Pervolaraki et al.

26 Address for Correspondence: Dr J Dachtler, Department of Psychology,

27 Durham University, South Road, Durham, DH1 3LE, UK. Email:

28 [james.dachtler@durham.ac.uk](mailto:james.dachtler@durham.ac.uk)

29

Pervolaraki et al.

30 **Abstract**

31 **Background**

32 Of the many genetic mutations known to increase the risk of autism spectrum  
33 disorder, a large proportion cluster upon synaptic proteins. One such family of  
34 presynaptic proteins are the neurexins (NRXN), and recent genetic and  
35 mouse evidence has suggested a causative role for *NRXN2* in generating  
36 altered social behaviours. Autism has been conceptualised as a disorder of  
37 atypical connectivity, yet how single-gene mutations affect such connectivity  
38 remains under-explored. To attempt to address this, we have developed a  
39 quantitative analysis of microstructure and connectivity leveraging diffusion  
40 tensor MRI (DTI) with high-resolution 3D imaging in optically cleared  
41 (CLARITY) brain tissue in the same mouse, applied here to the *Nrxn2 $\alpha$*   
42 knockout (KO) model.

43 **Methods**

44 Fixed brains of *Nrxn2 $\alpha$*  KO mice underwent DTI using 9.4T MRI, and diffusion  
45 properties of socially-relevant brain regions were quantified. The same tissue  
46 was then subjected to CLARITY to immunolabel axons and cell bodies, which  
47 were also quantified.

48 **Results** DTI revealed decreases in fractional anisotropy and increases in  
49 apparent diffusion coefficient in the amygdala (including the basolateral  
50 nuclei), the anterior cingulate cortex, the orbitofrontal cortex and the  
51 hippocampus. Radial diffusivity of the anterior cingulate cortex and  
52 orbitofrontal cortex was significantly increased in *Nrxn2 $\alpha$*  KO mice, as were  
53 tracts between the amygdala and the orbitofrontal cortex. Using CLARITY, we

Pervolaraki et al.

54 find significantly altered axonal orientation in the amygdala, orbitofrontal  
55 cortex and the anterior cingulate cortex, which was unrelated to cell density.

## 56 **Conclusions**

57 Our findings demonstrate that deleting a single neurexin gene (*Nrxn2α*)  
58 induces atypical connectivity within socially-relevant brain regions. More  
59 generally, our combined within-subject DTI and CLARITY approach presents  
60 a new, more sensitive method of revealing hitherto undetectable differences in  
61 the autistic brain.

62

## 63 **Key Words**

64 MRI, CLARITY, social, autism, axons, diffusion, structure, imaging

65

## 66 **Background**

67 Autism is a common neurodevelopmental disorder, which is highly heritable  
68 (1). While heritability is high, it is also clear that autism is highly polygenic.  
69 Around ~400-1000 genes are involved in autism susceptibility (2-5). Many of  
70 these genes cluster upon proteins relating to synaptic signaling (6). A family of  
71 presynaptic proteins garnering recent interest have been the neurexins  
72 (*NRXNs*). *NRXNs* are encoded by three genes (*NRXN1*, *NRXN2*, *NRXN3*;  
73 note that *CNTNAP1* and *CNTNAP2* are sometimes referred to as *NRXN4*), of  
74 which two major isoforms exist: the longer  $\alpha$  proteins with six  
75 laminin/neurexin/sex hormone (LNS) binding domains, and the shorter  $\beta$   
76 proteins with one LNS binding domain (7, 8).

77

Pervolaraki et al.

78 Mutations within all three *NRXN* genes have been linked to autism (6).  
79 Heterozygous deletions within *NRXN2* have been identified in a number of  
80 individuals with autistic phenotypes. These include an autistic boy and his  
81 father (who had severe language delay but not autism) who both had a  
82 frameshift mutation within exon 12 of *NRXN2* (9); a 570-kb de novo deletion  
83 of 24 genes at chromosome 11q13.1, including *NRXN2*, in a 21-year old man  
84 displaying a clinical phenotype including autistic traits (10); a 1.6Mb deletion  
85 at chromosome region 11q12.3-11q13.1, including *NRXN2*, in a 23-year old  
86 man with intellectual disability and behavioral problems (11); a de novo  
87 frameshift mutation identified in a Chinese man with autism spectrum disorder  
88 (ASD) (12), a 921 kb microdeletion at 11q13 in a 2 year old boy who had  
89 language and developmental delay (although did not meet the autism  
90 diagnosis criteria) (13) and a paternally inherited microRNA miR-873-5p  
91 variant in an ASD individual which altered binding affinity for several risk-  
92 genes including *NRXN2* and *CNTNAP2* (*NRXN4*) (14). Furthermore, recently,  
93 two large-scale reports have identified *NRXN2* with ASD risk. A study of 529  
94 ASD patients and 1,923 controls in a Chinese population identified two  
95 *NRXN2* variants which significantly increase ASD risk (15). The second study  
96 employed machine learning approaches across 5000 ASD families to rank the  
97 importance of ASD candidate genes, and ranks *NRXN2* in the top ~0.5% of  
98 genes, i.e. 113<sup>th</sup> (16). For comparison, *NRXN1*, for which the evidence base  
99 for its links to ASD is broader and stronger, ranks 45, and *CNTNAP2* ranks  
100 211<sup>th</sup> (16). Consistent with these association studies, we and others have  
101 previously found that homozygous or heterozygous deletion of *Nrxn2α*  
102 induces impairment in social approach and social recognition (17-19). In

Pervolaraki et al.

103 summary, although mutations within *NRXN2* are rare, understanding how they  
104 may drive social, ASD-relevant behavioural changes is important. One  
105 important goal is to help elucidate how apparently convergent  
106 pathophysiology in ASD emerges despite marked genetic heterogeneity  
107 (Insert ref Geschwind & State, 2015 cited above); mapping brain alterations  
108 driven by different single genes is thus a crucial task.

109

110 Currently it is unknown whether deletion of *Nrxn2 $\alpha$*  changes the brain's  
111 microstructure and connectivity. One previous study found coarse alterations  
112 to cell layer thickness within the hippocampus of *Nrxn2 $\alpha$*  homozygous KOs  
113 (20). However, cell density measurements are unlikely to reveal the true  
114 extent of changes within the autistic brain. Within the current study, we have  
115 addressed this by developing a dual imaging approach (DTI and CLARITY)  
116 that quantifies the alignment and density of white matter, applied here to brain  
117 regions known to support social behavior in a mouse model of autism.

118

119 Diffusion tensor MRI (or DTI) is based upon the movement of water  
120 molecules, a measure that is termed fractional anisotropy (FA). Apparent  
121 diffusion coefficient (ADC) is similar to FA, but quantifies diffusion restriction  
122 as opposed to the spatial symmetry of diffusion. This approach has been used  
123 to explore neuropathological markers in autistic patients; alterations in  
124 myelination, axonal abundance, size and orientation all modify FA and ADC  
125 values (21-23). Using the preferred direction of the diffusion of tensors  
126 between brain regions can be used to explore their potential connection.  
127 Quantification of those computed streamlines by FA and axial and/or radial

Pervolaraki et al.

128 diffusion can indicate impairments in regional connectivity. Since aberrant  
129 brain connectivity is likely a core feature of autism (24), we reasoned that the  
130 candidate method for probing the autistic brain should combine tractographic  
131 techniques. Accordingly, here, we combined high resolution imaging of  
132 labelled neuronal tracts in brains rendered transparent by CLARITY with DTI.

133

134 CLARITY is a recent development that renders tissue optically transparent  
135 and macromolecule permeable (25). This permits antibody staining and  
136 imaging of much larger tissue volumes than possible under traditional  
137 immunofluorescence techniques. By examining fiber orientation without  
138 sectioning-related artefacts and biases, axonal staining in cleared tissue  
139 affords a deeper understanding of the microstructure and connectivity of a  
140 brain region.

141

142 Given the social impairments found within *Nrxn2α* mice, we sought to  
143 examine those brain regions most closely linked with social behavior (See  
144 Supplemental Materials). Briefly, we identified four regions of interest (ROIs):  
145 the amygdala, and three brain regions strongly and directly connected to the  
146 amygdala; the hippocampus, orbitofrontal cortex (OFC), and anterior cingulate  
147 cortex (ACC). As predicted, connectivity was abnormal in *Nrxn2α* mice.

148

149 **Methods**

150 **Ethics**

151 All procedures were approved by the University of Leeds and Durham  
152 University Animal Ethical and Welfare Review Boards and were performed

Pervolaraki et al.

153 under UK Home Office Project and Personal Licenses in accordance with the  
154 Animals (Scientific Procedures) Act 1986.

155

#### 156 **Animals**

157 Full details of the animals, their background, genotyping and housing can be  
158 found elsewhere (17). In brief, male B6;129-  
159 *Nrxn3tm1Sud/Nrxn1tm1Sud/Nrxn2tm1Sud/J* mice (JAX #006377) were  
160 purchased from the Jackson Laboratory and outbred once to the  
161 C57BL/6NCrl strain (Charles River, Margate, United Kingdom) to obtain mice  
162 that were individually *Nrxn2α* KO heterozygotes. Subsequently, HET knockout  
163 males were bred with HET females (cousin mating).

164

#### 165 **Experimental animals**

166 6 adult wild-type males (Charles River, Margate, UK) and 6 age matched  
167 littermate *Nrxn2α* KO homozygotes (71 days  $\pm$  6 days old (SEM)) were  
168 perfused-fixed with 4% paraformaldehyde (PFA) in 0.1 M phosphate buffer  
169 saline (PBS) and the brains extracted. The brains were immersed in 4%  
170 PFA/0.1 M PBS for a minimum of 48 hours prior to imaging. During imaging,  
171 the samples were placed in custom-built MR-compatible tubes containing  
172 Fomblin Y (Sigma, Poole, Dorset, UK).

173

174 Due to the relatively low variance, and owing to the complexity and  
175 methodological nature in our experimental approach, we achieved  
176 significance by groups of 6 (power provided in Results). No data was



Pervolaraki et al.

177 excluded from the study. Sample randomisation was performed by JD, with  
178 experimenters (EP and ALT) blinded to genotype.

179

### 180 **Data Acquisition**

181 Image acquisition has been described elsewhere (26). Each brain was 3D  
182 imaged using the protocol TE: 35 ms, TR: 700 ms and 10 signal averages.

183 The field of view was set at 128 x 128 x 128, with a cubic resolution of 100  
184  $\mu\text{m}/\text{pixel}$  and a b value of 1200  $\text{s}/\text{mm}^2$ . Further details can be found in  
185 Supplemental Materials.

186

### 187 **Regions of Interest**

188 Our DTI approach was to undertake an *a posteriori* analysis of neural  
189 organization in regions of interest (ROIs) identified by previous literature as  
190 socially-relevant (see Supplemental Materials). We identified a canonical  
191 coronal slice (100  $\mu\text{m}$ ) for a given ROI from the standard mouse brain atlas  
192 (Figure 1A-D) (27). We analysed three coronal slices centred on the canonical  
193 slice, totalling 300  $\mu\text{m}$  in anterior/posterior extent.

194

### 195 **CLARITY**

196 Following MR imaging, the brains were washed in PBS to remove all Fomblin  
197 Y and then incubated for 7 days in hydrogel solution at 4°C prior to  
198 polymerisation at 37°C for 3.5 hours. The tissue was cut into 1.5 mm coronal  
199 sections using a custom 3D-printed brain-slicing matrix based on MRI scans  
200 of an adult C57BL/6 mouse brain (28) and incubated in clearing buffer for 24  
201 days at 37°C with shaking. The cleared tissue was then washed in PBSTN3

Pervolaraki et al.

202 (0.1% TritonX-100 and 1.5mM sodium azide in PBS) for 24 hours at room  
203 temperature and incubated in primary antibody solution (neurofilament (Aves  
204 NF-H) 1:100 in PBSTN<sub>3</sub>) at 37°C with shaking for 13 days. Samples were  
205 washed, and then incubated in secondary antibody (AlexaFluor 488 goat anti-  
206 chicken IgY) as per the primary. Sections were washed again, and incubated  
207 in 3.6 µM DAPI (4',6-diamidino-2-phenylindole) followed by 85% glycerol in  
208 PBS for refractive index matching.

209

210 Cleared samples were imaged using a Zeiss 7MP multiphoton microscope at  
211 770nm using a 20x objective lens (W Plan-Apochromat, NA 1.0, WD 1.7mm).  
212 Images (512 x 512 x 512 voxels or 265 x 265 x 265 µm with an isotropic  
213 resolution of 520 nm) were acquired in ACC, basolateral (BLA) and  
214 basomedial amygdala and OFC) in both hemispheres. DAPI and  
215 neurofilament signal was segmented into cell nuclei and axons, and the  
216 resulting binary images were used to generate values for cell density, axonal  
217 density and axonal alignment.

218

219 Full CLARITY methodological details are available within Supplemental  
220 Materials.

221

## 222 **Data Availability**

223 Codes to analyse CLARITY datasets are made available by author LCA by  
224 email request to either JD or LCA, subject to reference to the current paper.  
225 The datasets used and/or analysed during the current study are available  
226 from the corresponding author on reasonable request.

Pervolaraki et al.

227

## 228 **Data Analysis**

229 All data are expressed as mean  $\pm$  standard error of the mean (SEM). To  
230 assess the variance between genotypes within a single brain structure across  
231 hemispheres (given the importance of hemispheric differences in ASD (29)),  
232 data was analyzed by within subject repeated measures two-way ANOVAs,  
233 with Sidak multiple corrections employed on post hoc testing, or unpaired T-  
234 tests. To correct for multiple comparisons, we employed the Benjamini-  
235 Hochberg Procedure (corrected P values stated). Non-significant statistical  
236 results, particularly hemisphere comparisons, can be found in Supplemental  
237 Materials. Statistical testing and graphs were made using GraphPad Prism  
238 version 6 and SPSS v22.

239

## 240 **Results**

### 241 ***Nrxn2 $\alpha$* deletion disrupts DTI measures of microstructure in social brain** 242 **regions**

243 To assess whether *Nrxn2 $\alpha$*  deletion alters gross morphology, we quantified  
244 whole brain volume using DTI. We found total brain volume for wild-types and  
245 *Nrxn2 $\alpha$*  KOs was similar ( $456.0 \pm 14.76$  vs.  $466.2 \pm 11.0$  mm<sup>3</sup> (respectively);  
246  $t_{(10)} = 0.55$ ,  $p = 0.59$ ). Thus, *Nrxn2 $\alpha$*  deletion does not change total brain size.

247

248 To quantitatively measure DTI, we examined FA and ADC. FA analyses  
249 changes in the linear orientation (i.e. along an axonal tract), whereas ADC  
250 (mean diffusivity) averages diffusion in all directions (i.e. the X, Y and Z axis),  
251 which is sensitive to changes such as altered alignment. The amygdala is

Pervolaraki et al.

252 critically important for social behaviours. To assess whether amygdalar  
253 alterations might account for social impairments in *Nrxn2α* KO mice, we  
254 segmented the whole amygdala structure and the basolateral nuclei along the  
255 anterior-posterior axis.

256

257 The posterior amygdala showed a significant reduction in FA in *Nrxn2α* KO  
258 mice (Figure 2A-B) (anterior: genotype ( $F_{(1, 10)} = 5.81$ ,  $p = 0.056$ ); posterior:  
259 genotype ( $F_{(1, 10)} = 11.2$ ,  $p = 0.025$ , power = 85.4%). This FA reduction was  
260 also observed specifically in the BLA, a region strongly associated with social  
261 behaviours (Figure 2C; genotype ( $F_{(1, 10)} = 6.31$ ,  $p = 0.049$ , power = 62.1%).  
262 ADC was not significantly altered in the anterior amygdala, posterior  
263 amygdala or BLA (Figure 2D-F; all genotype:  $F_{(1, 10)} < 1$ ).

264

265 We conducted the same analysis for the two prefrontal regions implicated in  
266 social behaviour and autism: the OFC and ACC. The pattern of results was  
267 similar for both regions: FA was not altered, while ADC was increased in the  
268 OFC (Figure 3A-B) and the ACC (Figure 3C-D). FA for the OFC was not  
269 significantly altered (genotype: ( $F_{(1, 10)} = 3.04$ ,  $p = 0.079$ )) but ADC was  
270 significantly increased (genotype: ( $F_{(1, 10)} = 8.20$ ,  $p = 0.043$ , power = 73.3%).  
271 The ACC was unaltered in FA ( $t_{(10)} = 1.70$ ,  $p = 0.08$ ) but had significantly  
272 increased ADC ( $t_{(10)} = 7.52$ ,  $p = 0.002$ , power = 99.9%).

273

274 We sought to examine whether changes in the amygdala (Supp. Figure 3),  
275 OFC or ACC FA and ADC were driven by diffusion in the primary axis ( $\lambda_1$ ) or  
276 the radial orientations ( $\lambda_2$  and  $\lambda_3$ ) by characterisation of AD (primary) and RD

Pervolaraki et al.

277 (radial). Within the OFC (Figure 3E-F), AD was significantly increased  
278 (genotype: ( $F_{(1, 10)} = 10.74$ ,  $p = 0.029$ , power = 83.9%)), as was RD (genotype:  
279 ( $F_{(1, 10)} = 18.26$ ,  $p = 0.009$ , power = 97.0%)), suggesting that both along-tract  
280 diffusion and tract branching were affected. However, in the ACC (Figure 3G-  
281 H), only RD was significantly increased ( $t_{(10)} = 5.65$ ,  $p = 0.007$ , power =  
282 99.9%), with no alteration in AD ( $t_{(10)} = 1.69$ ,  $p = 0.09$ ). Increased RD is  
283 thought to reflect demyelination or changes in axonal density or orientation  
284 (30).

285

### 286 **DTI reveals altered hippocampal microstructure in *Nrxn2α* KO mice**

287 The hippocampus has recently been associated with social motivation and  
288 social recognition. Since the specific contributions of the dorsal and ventral  
289 hippocampal poles remain unclear, we segmented the whole hippocampus  
290 into anterior (Bregma -1.94 mm), middle (Bregma -2.46 mm) (both dorsal) and  
291 posterior (Bregma -3.28 mm) (incorporating ventral regions) levels.

292

293 FA values in the anterior, mid and posterior hippocampus were not  
294 significantly altered (see Supp. Table 1 for statistics and Supp. Figure 4A-C).  
295 Similarly, ADC was unaltered for the anterior and mid hippocampus (Supp.  
296 Table 1 for statistics and Supp. Figure 4D-E), but was significantly increased  
297 in *Nrxn2α* KO mice in the posterior hippocampus (genotype: ( $F_{(1, 10)} = 8.80$ ,  $p$   
298 = 0.036, power = 76.6%); Supp. Figure 4F). There were no significant  
299 genotype differences in AD in any of the hippocampal regions (Supp. Figure  
300 5A-C). However, RD was significantly increased in the posterior hippocampus  
301 in *Nrxn2α* KO mice (genotype: ( $F_{(1, 10)} = 10.83$ ,  $p = 0.027$ , power = 84.2%;

Pervolaraki et al.

302 Supp. Figure 5F) but not in anterior and mid regions (see Supp. Table 1;  
303 Supp. Figure 5D-E). In summary, the microstructural measures most altered  
304 by *Nrxn2α* deletion were increases in ADC and RD, and both these  
305 alterations occurred in the posterior hippocampus, in line with recent work  
306 suggesting a role for ventral hippocampus in social memory (31).

307

308 **DTI tractography reveals *Nrxn2α* deletion affects connectivity between**  
309 **the amygdala and orbitofrontal cortex**

310 The amygdala is strongly and bidirectionally connected to both the  
311 hippocampus (32) and the OFC (33). As all three regions are themselves  
312 important for social behaviour, and autism is thought to be related to abnormal  
313 connectivity (24), we performed tractography analysis between the amygdala  
314 (and specifically the BLA) and the hippocampus, and between the amygdala  
315 and the OFC.

316

317 From the anterior amygdala, we examined the diffusivity (AD and RD) of  
318 connections to the anterior and posterior hippocampus (Supp. Figure 6). We  
319 did not observe differences in RD in the tracts connecting the amygdala with  
320 the hippocampus (see Supp. Table 2 for non-significant statistics). Although  
321 AD between the anterior amygdala and anterior hippocampus did not differ by  
322 genotype, there was a significant interaction between genotype and  
323 hemisphere (genotype x hemisphere ( $F_{(1, 10)} = 12.12$ ,  $p = 0.023$ , power =  
324 88.0%; Figure 4A); post hoc analysis shows this was driven by larger right-vs-  
325 left hemisphere AD values within the *Nrxn2α* KOs only ( $p = 0.012$ ). This  
326 difference could be driven by the BLA; there was increased AD in both the

Pervolaraki et al.

327 BLA/anterior hippocampus tracts (genotype x hemisphere ( $F_{(1, 10)} = 10.53$ ,  $p =$   
328  $0.032$ , power = 83.2%) and the BLA/posterior hippocampus tracts (genotype x  
329 hemisphere ( $F_{(1, 10)} = 12.97$ ,  $p = 0.020$ , power = 90%), which again was  
330 related to larger right-vs-left hemisphere values in the *Nrxn2α* KOs  
331 (BLA/anterior Hippocampus:  $p = 0.004$  and BLA/posterior Hippocampus:  $p =$   
332  $0.001$ , (Figure 4C-D)) but not the wild-type (anterior:  $p = 0.87$ ; posterior:  $p =$   
333  $1.00$ ). These results indicate that there are differences for the connectivity of  
334 the amygdala with the hippocampus within the left and right hemisphere in  
335 *Nrxn2α* KO mice, with increased axial diffusivity in the right hemisphere. This  
336 finding is particularly interesting, as hemispheric differences in functional  
337 connectivity, particularly affecting connections from the right amygdala, have  
338 been found children with ASD (34, 35).

339

340 Finally, we tested connections between the amygdala and the orbitofrontal  
341 cortex. For AD, wild-type and *Nrxn2α* KO mice did not differ by genotype  
342 (Figure 4E: genotype: ( $F_{(1, 10)} = 2.85$ ,  $p = 0.09$ ), hemisphere: ( $F_{(1, 10)} = 6.38$ ,  $p =$   
343  $0.052$ ). RD was strikingly higher in *Nrxn2α* KO mice (Figure 4F: genotype:  
344 ( $F_{(1, 10)} = 26.06$ ,  $p = 0.023$ , power = 99.5%)), indicative of a change in  
345 demyelination, axonal density or orientation (30).

346

347 **CLARITY reveals fibre disruption in *Nrxn2α* KO mice in the amygdala,**  
348 **orbitofrontal cortex, and anterior cingulate cortex**

349 To further explore the differences as revealed by DTI, we performed CLARITY  
350 on the same brain tissue used in DTI, and stained with neurofilament and  
351 DAPI to label axons and cell bodies, respectively. We were then able to derive

Pervolaraki et al.

352 both the axonal alignment (as in, the geometric alignment of axons (from  
353 linear alignment to random) within 3D space (see Supp. Figure 2)) and  
354 density of the stained fibers, in addition to the cell density.

355

356 The pattern of results was broadly similar for both the prefrontal cortical ROIs.

357 That is, first, axonal alignment was increased in *Nrxn2α* KO mice in the ACC

358 (Figure 5D: genotype: ( $F_{(1, 10)} = 16.06$ ,  $p = 0.011$ , power = 94.9%) but not the

359 OFC (Figure 5G: genotype: ( $F_{(1, 10)} = 5.56$ ,  $p = 0.059$ ). Second, this could not

360 be explained by a difference in cell density, since that was similar between the

361 KO and wild-type mice in both the ACC (Figure 5F: genotype: ( $F_{(1, 10)} < 1$ ),

362 hemisphere: ( $F_{(1, 10)} = 1.73$ ,  $p = 0.11$ ) and the OFC (Figure 5H: genotype: ( $F_{(1,$

363  $_{10)} = 3.09$ ,  $p = 0.08$ ). An increase in axonal density in *Nrxn2α* KO mice was

364 reliable in the ACC (Figure 5E: genotype: ( $F_{(1, 10)} = 14.64$ ,  $p = 0.014$ , power =

365 93.0%), but not in the OFC (Figure 5H: genotype: ( $F_{(1, 10)} = 3.09$ ,  $p = 0.083$ ).

366

367 We further examined two regions of the anterior amygdala, the BLA and

368 basomedial (BMA) nuclei, where altered social cellular responses have been

369 reported in human autism (36). We did not observe any significant differences

370 for axonal alignment or fibre density in the BLA (see Supp. Figure 7A-C), but

371 whereas axonal alignment (Figure 5J, genotype:  $F_{(1, 10)} = 7.70$ ,  $p = 0.045$ ,

372 power = 70.6%) but not axonal density (Figure 5K: genotype: ( $F_{(1, 10)} = 6.10$ ,  $p$

373 = 0.054) was increased in *Nrxn2α* KO mice in the basomedial nuclei, while

374 cell density was unaffected (Figure 5L: genotype: ( $F_{(1, 10)} < 1$ ). Alterations in

375 axonal alignment and density as directly revealed by CLARITY could explain



Pervolaraki et al.

376 the increases in diffusivity and RD in the prefrontal regions, as measured by  
377 DTI.

378

379 To test the specificity of these alterations, we examined three further brain  
380 regions; the primary motor cortex (M1; Supp. Figure 7D-F), the primary  
381 somatosensory cortex (S1; Supp. Figure 7H-J) and the barrel field (BF; Supp.  
382 Figure 7K-M). Interestingly, although there were differences between the  
383 hemispheres, there were no statistical differences between the genotypes or  
384 genotype x hemisphere interactions for any measure (Supp. Table 3),  
385 suggesting some specificity of the alterations in social-relevant brain regions  
386 in *Nrxn2α* KO mice.

387

388 In summary, in both the prefrontal ROIs, namely the OFC, and the ACC, DTI  
389 showed that ADC and RD were increased in *Nrxn2α* KO mice, likely related to  
390 complementary analysis from CLARITY showing that axonal alignment was  
391 altered in *Nrxn2α* KO mice in both prefrontal ROIs.

392

### 393 **Discussion**

394 Interestingly, the single-gene deletion of *Nrxn2α* captures several key aspects  
395 of human ASD. In terms of behaviour, three studies have now found social  
396 deficits associated with *Nrxn2α* KO (17-19); in terms of brain structure, as  
397 reported here (summarised below), the *Nrxn2α* KO mouse model shows  
398 altered microstructure and connectivity patterns in socially-relevant brain  
399 regions reminiscent of changes in ASD.

400

Pervolaraki et al.

401 A DTI approach has been used for some time to explore neuropathological  
402 markers in autistic patients; alterations in myelination, axonal abundance, size  
403 and orientation all modify FA and ADC values (21, 37), specifically by  
404 reducing amygdala FA (23, 37), and have been used as a quantitative  
405 measure of changes to brain white matter integrity (23, 24). Increased cortical  
406 ADC typically indexes reduced functionality: e.g. increased hippocampal ADC  
407 is associated with mild cognitive impairment (38, 39) and predicts verbal and  
408 visuospatial memory in old healthy controls (40). Furthermore, both increased  
409 RD of various white matter tracts (41, 42) and increased whole-brain AD (42)  
410 have been observed in ASD. The *Nrxn2α* KO mouse reproduces many of  
411 these specific changes, including reduced FA and increases in ADC, AD and  
412 RD. Whole brain increases in ADC, AD and RD (but not FA) have been  
413 reported in ASD children, as have increases in ADC and RD in frontal cortex  
414 tracts (42). This is in agreement with other studies noting increased ADC in  
415 frontal cortex in ASD (37), as we observed here in both the prefrontal regions  
416 examined, the OFC and ACC. Likewise, FA was reduced in the amygdala in  
417 ASD children and adolescents (43), and right-sided lateralisation of abnormal  
418 amygdala/hippocampus-related connections, as seen in our *Nrxn2α* KO  
419 mouse, has been noted in high-functioning adolescents/adults with autism  
420 (44).

421

422 Our findings corroborate these quantifications of clinical autism, but highlights  
423 the question of what do the different measures of ADC, FA, AD and RD  
424 represent? Importantly, we observed these microstructural changes in various  
425 socially-relevant brain regions against a background of unchanged cell

Pervolaraki et al.

426 density in all our study's ROIs. Unexpectedly, this highlights the power of our  
427 new approach. Dudanova et al. (2007) concluded from measures of cell  
428 counting and cortical cell layer thickness that NRXN2 played little role in  
429 normal brain development (20). Indeed, in earlier studies, it was suggested  
430 that deletion of all *Nrxns* was unlikely to affect synaptic development but  
431 instead disrupts synaptic function (45). We propose that measures such as  
432 two-dimensional cell counting may be underestimating the impact of genetic  
433 mutations upon normal development. By staining cleared brain tissue with a  
434 nuclear marker and performing automated three-dimensional cell counting, we  
435 found no effect of *Nrxn2 $\alpha$*  deletion on cell density in any region of interest  
436 examined. But this belies the clear effects upon microstructure integrity across  
437 multiple regions as measured by both DTI and CLARITY, and its specificity;  
438 only the socially-relevant brain regions we tested were disrupted, and not  
439 primary sensory or motor regions. Future studies will benefit from employing  
440 more sensitive measures of brain structure and connectivity to determine the  
441 relevance of genetic mutations in development.

442

443 FA and ADC can be influenced by changes in axonal density and alignment  
444 (e.g. by myelination, demyelination, axonal damage, loss of white matter  
445 coherence (46)). It is likely that the axonal alignment metric used to quantify  
446 CLARITY more closely reflects the ADC measure of DTI, given that ADC (or  
447 mean diffusivity) equally weights diffusion across all eigenvectors and does  
448 not bias the primary eigenvector as FA does. Thus, it is likely that alterations  
449 in the properties of axons in *Nrxn2 $\alpha$*  KO mice are driving these changes in FA  
450 and ADC. Given we mostly see differences in RD, thought to reflect tract

Pervolaraki et al.

451 branching and myelination (as it measures  $\lambda_2$  and  $\lambda_3$ ), it is possible that the  
452 orientation in the perpendicular not parallel orientation of fibres is mostly  
453 affected. Given the differences in the amygdala, OFC and ACC, it is possible  
454 that even though neuronal densities are similar in the *Nrxn2 $\alpha$*  KO brain, it is  
455 the connections between neurones and brain regions that are perturbed. This  
456 would be consistent with the idea that connectivity disruption may represent a  
457 core feature of autism (47). A broader question is how does the loss of  
458 *Nrxn2 $\alpha$*  account for changes in axonal organisation? Ultimately, this question  
459 requires further studies. Others have shown that in *Nrxn2 $\alpha$*  KO mice,  
460 excitatory transmitter release is reduced, as is short-term plasticity (18).  
461 Reduced glutamatergic release, even at a relatively long range to the  
462 synapse, can change the complexity of dendritic arbors (48). As this is a gene  
463 deletion model, it is conceivable that altered glutamatergic signalling during  
464 early development impairs appropriate synapse maturation, leading to the  
465 structural changes we see herein. Further, how or whether these structural  
466 changes fully explain the social impairments of *Nrxn2 $\alpha$*  KO mice would require  
467 new studies. Conceivably, inducible knock-down of *Nrxn2* (by inducible  
468 knockout, siRNA, optogenetics etc.) within a specific brain region would  
469 provide evidence that social abnormalities are being driven by *Nrxn2* loss.  
470 However, developmentally-dependent altered connectivity would be harder to  
471 definitively manipulate to explain changes in social behaviours.

472

473 Here we have developed a new application of CLARITY to quantitatively  
474 investigate disease models by combining DTI with high resolution 3D imaging  
475 and automated analysis of axonal fibres in a within subject study. Inevitably,

Pervolaraki et al.

476 there are some technical limitations that will require future refinement as this  
477 technology matures.

478

479 First, while we used CLARITY and immunolabeling to identify axons, we  
480 cannot know whether axon-related changes alone reflect all the changes we  
481 observed for our DTI measures. Second, whilst we can segment entire brain  
482 regions for DTI analysis, it was not practical to image larger brain areas at the  
483 necessary resolution for CLARITY. While it is theoretically possible that we  
484 may bias sampling of each brain region by picking ROIs for multiphoton  
485 imaging, this was done using atlas-defined coordinates and by an  
486 experimenter blind to the DTI results, so minimising any bias. However, within  
487 the current study, we were only able to apply the CLARITY approach to the  
488 amygdala, OFC and ACC. It was not practical to apply this methodology to the  
489 hippocampus, due to its extremely heterogeneous structure. The small cubic  
490 ROIs could not be reproducibly positioned, and larger ROIs to average across  
491 larger areas of the hippocampus were not possible. Although imaging of fibre  
492 tracts in large volumes of cleared tissue is possible (49), fluorescent labelling  
493 limitations make it impractical for a study of this nature. Despite this, as the  
494 adoption of the CLARITY technique increases, we hope that the use of DTI  
495 and CLARITY to study connectivity across spatial scales will become  
496 commonplace.

497

498 As yet, no one DTI protocol has emerged as the standard for *in vivo* or *ex vivo*  
499 imaging. Indeed, there has been debate regarding the best number of  
500 diffusion gradients to use, among other parameters (50). Whilst some claim a

Pervolaraki et al.

501 minimum of 30 directions are required to estimate anisotropy (50), others  
502 claim that the benefits of using more than six are limited (51-54). A limitation  
503 of these studies is that these competing claims have not been complemented  
504 with standard neuroanatomical techniques. Our study provides further  
505 evidence that six directions are sufficient to detect genotypic differences.  
506 Where we found DTI differences, these were corroborated by the  
507 quantification of CLARITY (OFC, ACC, with BLA differences not reaching  
508 statistical significance after multiple-comparison correction). A further potential  
509 limitation of the current study is that groups of six animals may be  
510 underpowered. We argue for our approach here as follows. First, low variance  
511 in the datasets permits smaller group sizes. Second, for 18 of our 22  
512 significant results, the observed power was more than 80%. Third, given the  
513 technical complexity of this approach, particularly in its early adoption and  
514 refinement stages, large sample throughput of multiple brain regions is  
515 challenging.

516

517 In summary, our combined use of DTI and CLARITY has revealed changes in  
518 microstructure and connectivity of socially-relevant brain regions in *Nrxn2α*  
519 KO mice that may underlie their deficits in social behaviour. It is hard to  
520 conceive how these changes could have been observed using classical  
521 experimental approaches. We envisage this approach will deliver a new level  
522 of detail in the connectivity approaches to understanding autism.

523

## 524 **Abbreviations**

525 ACC: anterior cingulate cortex

Pervolaraki et al.

526 AD: axial diffusivity

527 ADC: apparent diffusion coefficient

528 ASD: autism spectrum disorder

529 BLA: basolateral amygdala

530 CLARITY: optically cleared brain tissue

531 DTI: diffusion tensor imaging

532 FA: fractional anisotropy

533 OFC: orbitofrontal cortex

534 Nrnx2: neurexin II

535 RD: radial diffusivity

536 ROI: region of interest

537

538 **Declarations**

539 **Ethics approval and consent to participate**

540 All experiments were performed under UK Home Office Project and Personal

541 Licenses in accordance with the Animals (Scientific Procedures) Act 1986,

542 and with the approval of the University of Leeds and Durham University

543 Animal Ethical and Welfare Review Boards.

544

545 **Consent for publication**

546 Not applicable

547

548 **Availability of data and material**

549 The codes used to quantify the CLARITY datasets are made available by

550 author LCA by email request to authors LCA or JD, subject to reference to the

Pervolaraki et al.

551 current paper. The datasets used and/or analysed during the current study  
552 are available from the corresponding author on reasonable request.

553

#### 554 **Competing interests**

555 The authors declare no competing interests.

556

#### 557 **Funding**

558 This work was supported by the Guy's and St. Thomas' Charity Prize PhD  
559 scholarship to ALT, a Medical Research Council (UK) grant (G0900625) to  
560 SJC and RJR, a University of Leeds Wellcome Trust ISSF (UK) Fellowship, a  
561 Royal Society (UK) grant (RG130316), an Alzheimer's Society Fellowship  
562 (AS-JF-15-008) to JD, a British Pharmacological Society (UK) grant to JD and  
563 CL, a BBSRC grant to LCA (BB/P000479/1) and a BBSRC grant to CL  
564 (BB/M008975/1). We acknowledge financial support from the Innovative  
565 Medicines Initiative Joint Undertaking under grant agreement no. 115300,  
566 resources of which are composed of financial contribution from the European  
567 Union's Seventh Framework Programme (FP7/2007–2013) and EFPIA  
568 companies' in kind contribution, the Mortimer D Sackler Foundation and the  
569 Sackler Institute for Translational Neurodevelopment (ALT and LCA). Some  
570 analysis scripts were provided to ALT at the Computational Image Analysis in  
571 Cellular and Developmental Biology course at the Marine Biological  
572 Laboratory (Woods Hole, MA, USA), funded by National Institutes of Health  
573 (R25 GM103792-01).

574

#### 575 **Authors' contribution**



Pervolaraki et al.

576 EP, ALT, LCA and JD conceived the study. EP and ALT performed the  
577 experiments. EP, ALT, LCA and JD analysed the data. SJC, RJR, LCA and  
578 JD funded the study. All authors contributed to writing the paper. All authors  
579 have read and approved the final manuscript.

580

## 581 **Acknowledgements**

582 Not applicable.

583

## 584 **References**

- 585 1. Sandin S, Lichtenstein P, Kuja-Halkola R, Larsson H, Hultman CM,  
586 Reichenberg A. The familial risk of autism. *Jama*. 2014;311(17):1770-7.
- 587 2. Cardno AG, Gottesman, II. Twin studies of schizophrenia: from bow-and-  
588 arrow concordances to star wars Mx and functional genomics. *American journal of*  
589 *medical genetics*. 2000;97(1):12-7.
- 590 3. Ronald A, Happe F, Bolton P, Butcher LM, Price TS, Wheelwright S, et al.  
591 Genetic heterogeneity between the three components of the autism spectrum: a twin  
592 study. *Journal of the American Academy of Child and Adolescent Psychiatry*.  
593 2006;45(6):691-9.
- 594 4. Ronemus M, Iossifov I, Levy D, Wigler M. The role of de novo mutations in  
595 the genetics of autism spectrum disorders. *Nature reviews Genetics*. 2014;15(2):133-  
596 41.
- 597 5. Geschwind DH, State MW. Gene hunting in autism spectrum disorder: on the  
598 path to precision medicine. *The Lancet Neurology*. 2015;14(11):1109-20.
- 599 6. Sahin M, Sur M. Genes, circuits, and precision therapies for autism and  
600 related neurodevelopmental disorders. *Science*. 2015;350(6263).
- 601 7. Lise MF, El-Husseini A. The neuroligin and neurexin families: from structure  
602 to function at the synapse. *Cellular and molecular life sciences : CMLS*.  
603 2006;63(16):1833-49.
- 604 8. Sudhof TC. Synaptic Neurexin Complexes: A Molecular Code for the Logic  
605 of Neural Circuits. *Cell*. 2017;171(4):745-69.
- 606 9. Gauthier J, Siddiqui TJ, Huashan P, Yokomaku D, Hamdan FF, Champagne  
607 N, et al. Truncating mutations in NRXN2 and NRXN1 in autism spectrum disorders  
608 and schizophrenia. *Human genetics*. 2011;130(4):563-73.
- 609 10. Mohrmann I, Gillessen-Kaesbach G, Siebert R, Caliebe A, Hellenbroich Y. A  
610 de novo 0.57 Mb microdeletion in chromosome 11q13.1 in a patient with speech  
611 problems, autistic traits, dysmorphic features and multiple endocrine neoplasia type 1.  
612 *European journal of medical genetics*. 2011;54(4):e461-4.
- 613 11. Boyle MI, Jespersgaard C, Nazaryan L, Ravn K, Brondum-Nielsen K,  
614 Bisgaard AM, et al. Deletion of 11q12.3-11q13.1 in a patient with intellectual  
615 disability and childhood facial features resembling Cornelia de Lange syndrome.  
616 *Gene*. 2015;572(1):130-4.

Pervolaraki et al.

- 617 12. Li J, Wang L, Gou H, Shi L, Zhang K, Tang M, et al. Targeted sequencing and  
618 functional analysis reveal brain-size-related genes and their networks in autism  
619 spectrum disorders. *Molecular Psychiatry*. 2017;22:1282–90.
- 620 13. Yuan H, Li X, Wang Q, Yang W, Song J, Hu X, et al. A de novo 921Kb  
621 microdeletion at 11q13.1 including neurexin 2 in a boy with developmental delay,  
622 deficits in speech and language without autistic behaviors. *European journal of  
623 medical genetics*. 2018.
- 624 14. Williams SM, An JY, Edson J, Watts M, Murigneux V, Whitehouse AJO, et  
625 al. An integrative analysis of non-coding regulatory DNA variations associated with  
626 autism spectrum disorder. *Molecular psychiatry*. 2018.
- 627 15. Wang J, Gong J, Li L, Chen Y, Liu L, Gu H, et al. Neurexin gene family  
628 variants as risk factors for autism spectrum disorder. *Autism research : official journal  
629 of the International Society for Autism Research*. 2018;11(1):37-43.
- 630 16. Duda M, Zhang H, Li HD, Wall DP, Burmeister M, Guan Y. Brain-specific  
631 functional relationship networks inform autism spectrum disorder gene prediction.  
632 *Translational psychiatry*. 2018;8(1):56.
- 633 17. Dachtler J, Glasper J, Cohen RN, Ivorra JL, Swiffen DJ, Jackson AJ, et al.  
634 Deletion of alpha-neurexin II results in autism-related behaviors in mice.  
635 *Translational psychiatry*. 2014;4:e484.
- 636 18. Born G, Grayton HM, Langhorst H, Dudanova I, Rohlmann A, Woodward  
637 BW, et al. Genetic targeting of NRXN2 in mice unveils role in excitatory cortical  
638 synapse function and social behaviors. *Frontiers in synaptic neuroscience*. 2015;7:3.
- 639 19. Dachtler J, Ivorra JL, Rowland TE, Lever C, Rodgers RJ, Clapcote SJ.  
640 Heterozygous deletion of alpha-neurexin I or alpha-neurexin II results in behaviors  
641 relevant to autism and schizophrenia. *Behavioral neuroscience*. 2015;129(6):765-76.
- 642 20. Dudanova I, Tabuchi K, Rohlmann A, Sudhof TC, Missler M. Deletion of  
643 alpha-neurexins does not cause a major impairment of axonal pathfinding or synapse  
644 formation. *The Journal of comparative neurology*. 2007;502(2):261-74.
- 645 21. Beaulieu C. The basis of anisotropic water diffusion in the nervous system - a  
646 technical review. *NMR in biomedicine*. 2002;15(7-8):435-55.
- 647 22. Barnea-Goraly N, Kwon H, Menon V, Eliez S, Lotspeich L, Reiss AL. White  
648 matter structure in autism: preliminary evidence from diffusion tensor imaging.  
649 *Biological psychiatry*. 2004;55(3):323-6.
- 650 23. Noriuchi M, Kikuchi Y, Yoshiura T, Kira R, Shigeto H, Hara T, et al. Altered  
651 white matter fractional anisotropy and social impairment in children with autism  
652 spectrum disorder. *Brain research*. 2010;1362:141-9.
- 653 24. Belmonte MK, Allen G, Beckel-Mitchener A, Boulanger LM, Carper RA,  
654 Webb SJ. Autism and abnormal development of brain connectivity. *The Journal of  
655 neuroscience : the official journal of the Society for Neuroscience*. 2004;24(42):9228-  
656 31.
- 657 25. Chung K, Wallace J, Kim SY, Kalyanasundaram S, Andalman AS, Davidson  
658 TJ, et al. Structural and molecular interrogation of intact biological systems. *Nature*.  
659 2013;497(7449):332-7.
- 660 26. Pervolaraki E, Anderson RA, Benson AP, Hayes-Gill B, Holden AV, Moore  
661 BJ, et al. Antenatal architecture and activity of the human heart. *Interface focus*.  
662 2013;3(2):20120065.
- 663 27. Paxinos G, Franklin K. *The Mouse Brain in Stereotaxic Coordinates*. Third ed:  
664 Academic Press; 2008.

Pervolaraki et al.

- 665 28. Tyson AL, Hilton ST, Andrae LC. Rapid, simple and inexpensive production  
666 of custom 3D printed equipment for large-volume fluorescence microscopy.  
667 *International journal of pharmaceutics*. 2015;494(2):651-6.
- 668 29. Herbert MR, Ziegler DA, Deutsch CK, O'Brien LM, Kennedy DN, Filipek  
669 PA, et al. Brain asymmetries in autism and developmental language disorder: a nested  
670 whole-brain analysis. *Brain : a journal of neurology*. 2005;128(Pt 1):213-26.
- 671 30. Alexander AL, Lee JE, Lazar M, Field AS. Diffusion tensor imaging of the  
672 brain. *Neurotherapeutics : the journal of the American Society for Experimental  
673 NeuroTherapeutics*. 2007;4(3):316-29.
- 674 31. Okuyama T, Kitamura T, Roy DS, Itohara S, Tonegawa S. Ventral CA1  
675 neurons store social memory. *Science*. 2016;353(6307):1536-41.
- 676 32. Pitkanen A, Pikkarainen M, Nurminen N, Ylinen A. Reciprocal connections  
677 between the amygdala and the hippocampal formation, perirhinal cortex, and  
678 postrhinal cortex in rat. A review. *Annals of the New York Academy of Sciences*.  
679 2000;911:369-91.
- 680 33. Cavada C, Company T, Tejedor J, Cruz-Rizzolo RJ, Reinoso-Suarez F. The  
681 anatomical connections of the macaque monkey orbitofrontal cortex. A review.  
682 *Cerebral cortex*. 2000;10(3):220-42.
- 683 34. Abrams DA, Lynch CJ, Cheng KM, Phillips J, Supekar K, Ryali S, et al.  
684 Underconnectivity between voice-selective cortex and reward circuitry in children  
685 with autism. *Proceedings of the National Academy of Sciences of the United States of  
686 America*. 2013;110(29):12060-5.
- 687 35. Murphy ER, Foss-Feig J, Kenworthy L, Gaillard WD, Vaidya CJ. Atypical  
688 Functional Connectivity of the Amygdala in Childhood Autism Spectrum Disorders  
689 during Spontaneous Attention to Eye-Gaze. *Autism research and treatment*.  
690 2012;2012:652408.
- 691 36. Rutishauser U, Tudusciuc O, Wang S, Mamelak AN, Ross IB, Adolphs R.  
692 Single-neuron correlates of atypical face processing in autism. *Neuron*.  
693 2013;80(4):887-99.
- 694 37. Sundaram SK, Kumar A, Makki MI, Behen ME, Chugani HT, Chugani DC.  
695 Diffusion tensor imaging of frontal lobe in autism spectrum disorder. *Cerebral cortex*.  
696 2008;18(11):2659-65.
- 697 38. Fellgiebel A, Wille P, Muller MJ, Winterer G, Scheurich A, Vucurevic G, et  
698 al. Ultrastructural hippocampal and white matter alterations in mild cognitive  
699 impairment: a diffusion tensor imaging study. *Dementia and geriatric cognitive  
700 disorders*. 2004;18(1):101-8.
- 701 39. Stebbins GT, Murphy CM. Diffusion tensor imaging in Alzheimer's disease  
702 and mild cognitive impairment. *Behavioural neurology*. 2009;21(1):39-49.
- 703 40. Carlesimo GA, Cherubini A, Caltagirone C, Spalletta G. Hippocampal mean  
704 diffusivity and memory in healthy elderly individuals: a cross-sectional study.  
705 *Neurology*. 2010;74(3):194-200.
- 706 41. Ameis SH, Fan J, Rockel C, Voineskos AN, Lobaugh NJ, Soorya L, et al.  
707 Impaired structural connectivity of socio-emotional circuits in autism spectrum  
708 disorders: a diffusion tensor imaging study. *PloS one*. 2011;6(11):e28044.
- 709 42. Shukla DK, Keehn B, Muller RA. Tract-specific analyses of diffusion tensor  
710 imaging show widespread white matter compromise in autism spectrum disorder.  
711 *Journal of child psychology and psychiatry, and allied disciplines*. 2011;52(3):286-95.
- 712 43. Jou RJ, Jackowski AP, Papademetris X, Rajeevan N, Staib LH, Volkmar FR.  
713 Diffusion tensor imaging in autism spectrum disorders: preliminary evidence of

Pervolaraki et al.

- 714 abnormal neural connectivity. The Australian and New Zealand journal of psychiatry.  
715 2011;45(2):153-62.
- 716 44. Conturo TE, Williams DL, Smith CD, Gultepe E, Akbudak E, Minshew NJ.  
717 Neuronal fiber pathway abnormalities in autism: an initial MRI diffusion tensor  
718 tracking study of hippocampo-fusiform and amygdalo-fusiform pathways. Journal of  
719 the International Neuropsychological Society : JINS. 2008;14(6):933-46.
- 720 45. Missler M, Zhang W, Rohlmann A, Kattenstroth G, Hammer RE, Gottmann  
721 K, et al. Alpha-neurexins couple Ca<sup>2+</sup> channels to synaptic vesicle exocytosis.  
722 Nature. 2003;423(6943):939-48.
- 723 46. Alba-Ferrara LM, de Erausquin GA. What does anisotropy measure? Insights  
724 from increased and decreased anisotropy in selective fiber tracts in schizophrenia.  
725 Frontiers in integrative neuroscience. 2013;7:9.
- 726 47. Minshew NJ, Williams DL. The new neurobiology of autism: cortex,  
727 connectivity, and neuronal organization. Archives of neurology. 2007;64(7):945-50.
- 728 48. Andreae LC, Burrone J. Spontaneous Neurotransmitter Release Shapes  
729 Dendritic Arbors via Long-Range Activation of NMDA Receptors. Cell reports. 2015.
- 730 49. Ye L, Allen WE, Thompson KR, Tian Q, Hsueh B, Ramakrishnan C, et al.  
731 Wiring and Molecular Features of Prefrontal Ensembles Representing Distinct  
732 Experiences. Cell. 2016;165(7):1776-88.
- 733 50. Jones DK. The effect of gradient sampling schemes on measures derived from  
734 diffusion tensor MRI: a Monte Carlo study. Magnetic resonance in medicine.  
735 2004;51(4):807-15.
- 736 51. Lebel C, Benner T, Beaulieu C. Six is enough? Comparison of diffusion  
737 parameters measured using six or more diffusion-encoding gradient directions with  
738 deterministic tractography. Magnetic resonance in medicine. 2012;68(2):474-83.
- 739 52. Hasan KM, Parker DL, Alexander AL. Comparison of gradient encoding  
740 schemes for diffusion-tensor MRI. Journal of magnetic resonance imaging : JMRI.  
741 2001;13(5):769-80.
- 742 53. Yao X, Yu T, Liang B, Xia T, Huang Q, Zhuang S. Effect of increasing  
743 diffusion gradient direction number on diffusion tensor imaging fiber tracking in the  
744 human brain. Korean journal of radiology. 2015;16(2):410-8.
- 745 54. Ni H, Kavcic V, Zhu T, Ekholm S, Zhong J. Effects of number of diffusion  
746 gradient directions on derived diffusion tensor imaging indices in human brain. AJNR  
747 American journal of neuroradiology. 2006;27(8):1776-81.
- 748

Pervolaraki et al.

749 **Figure Legends**

750 **Figure 1**

751 Quantification of CLARITY imaging. **A** Sections of DTI-scanned brain were  
752 segmented at different Bregma levels for (i) the orbitofrontal cortex, (ii) the  
753 anterior hippocampus and amygdala, (iii) the mid hippocampus and posterior  
754 amygdala and (iv) the posterior hippocampus. **B-D** DTI-scanned brains were  
755 computed for tracts. Tissue from wild-type and *Nrxn2α* KO mice were cleared  
756 and stained for neurofilament and DAPI (**E**). **F** Automated MATLAB scripts  
757 were used to segment the DAPI (blue) and neurofilament (purple) channels  
758 such that cell density and axonal density and orientation could be calculated.  
759 **G** is representative of a CLARITY-derived 3D stacked image of a DAPI and  
760 neurofilament of a region of interest, with **H** being the corresponding  
761 segmented image. Scale bar: 100 μm.

762

763 **Figure 2**

764 Deletion of *Nrxn2α* reduces amygdala fractional anisotropy (FA) but not  
765 apparent diffusion coefficient (ADC). DTI images of the amygdala was  
766 segmented at two regions; anterior (Bregma -1.94 mm) and posterior (Bregma  
767 -2.46 mm). FA of the whole amygdala structure was significantly reduced in  
768 the posterior (**B**) but not (**A**) region. FA was also significantly reduced in the  
769 anterior basolateral amygdala (BLA) (**C**). However, ADC was similar between  
770 the genotypes in the anterior (**D**), posterior (**E**) and BLA (**F**). \*\*= $P < 0.01$ ,  
771 \*= $P < 0.05$ . Error bars represent s.e.m. Wild-type n=6, *Nrxn2α* KO n=6.

772

773 **Figure 3**

Pervolaraki et al.

774 *Nrxn2α* KO mice have increased apparent diffusion coefficient (ADC) and  
775 axial (AD) and radial diffusivity (RD) in the orbitofrontal cortex (OFC) and the  
776 anterior cingulate cortex (ACC). Although reduced, there was no significant  
777 difference between wild-types and *Nrxn2α* KO mice for FA in the OFC (**A**) and  
778 ACC (**C**), but ADC was significantly increased in *Nrxn2α* KO mice in both  
779 prefrontal regions (**B** and **D**). The OFC has significantly increased AD and RD  
780 (**E-F**), whereas only RD was increased in the ACC (**G-H**). \*\*\*= $P=0.0005$ ,  
781 \*\*\*= $P<0.001$ , \*\*= $P<0.01$ , \*= $P<0.05$ . Error bars represent s.e.m. Wild-type  $n=6$ ,  
782 *Nrxn2α* KO  $n=6$ .

783

#### 784 **Figure 4**

785 Tractographic analysis of amygdala-hippocampus and amygdala-orbitofrontal  
786 cortex (OFC) connectivity. Amygdala-hippocampal connections are  
787 characterised by greater right hemisphere axial diffusivity (AD) *Nrxn2α* KO  
788 mice (**A**) but not radial diffusivity (RD) (**B**). Specific to the BLA, connections to  
789 the anterior hippocampus (**C**) and posterior hippocampus (**D**) have greater  
790 right hemisphere AD. Although the amygdala-OFC connection was similar  
791 between the genotypes for AD (**E**), *Nrxn2α* KO mice had significantly  
792 increased RD (**F**). \*= $P<0.05$ , \*\*\*= $P<0.001$ . Error bars represent s.e.m. Wild-  
793 type  $n=6$ , *Nrxn2α* KO  $n=6$ .

794

#### 795 **Figure 5**

796 CLARITY reveals differences in axonal alignment and fibre density in *Nrxn2α*  
797 KO mice. (**A-C**) Representative images of the CLARITY-treated brain, with  
798 ROI defined for the anterior cingulate cortex (ACC), orbitofrontal cortex

Pervolaraki et al.

799 (OFC), basomedial amygdala (BMA) and basolateral amygdala (BLA). For the  
800 ACC, the axonal alignment (**D**) and axon density (**E**) were significantly altered  
801 in KO mice, but cell density was unaltered (**F**). Within the medial OFC, only  
802 axonal alignment was significantly altered in KOs (**G**), with axon density (**H**)  
803 and cell density (**I**) being similar. For the BMA, both the axonal alignment (**J**)  
804 and axon density (**K**) were significantly increased, whilst cell density was  
805 unaltered (**L**). \*= $P < 0.05$ , \*\*= $P < 0.01$ . Error bars represent s.e.m. Wild-type  
806  $n=6$ , *Nrxn2* $\alpha$  KO  $n=6$ .  
807

# Figure 1

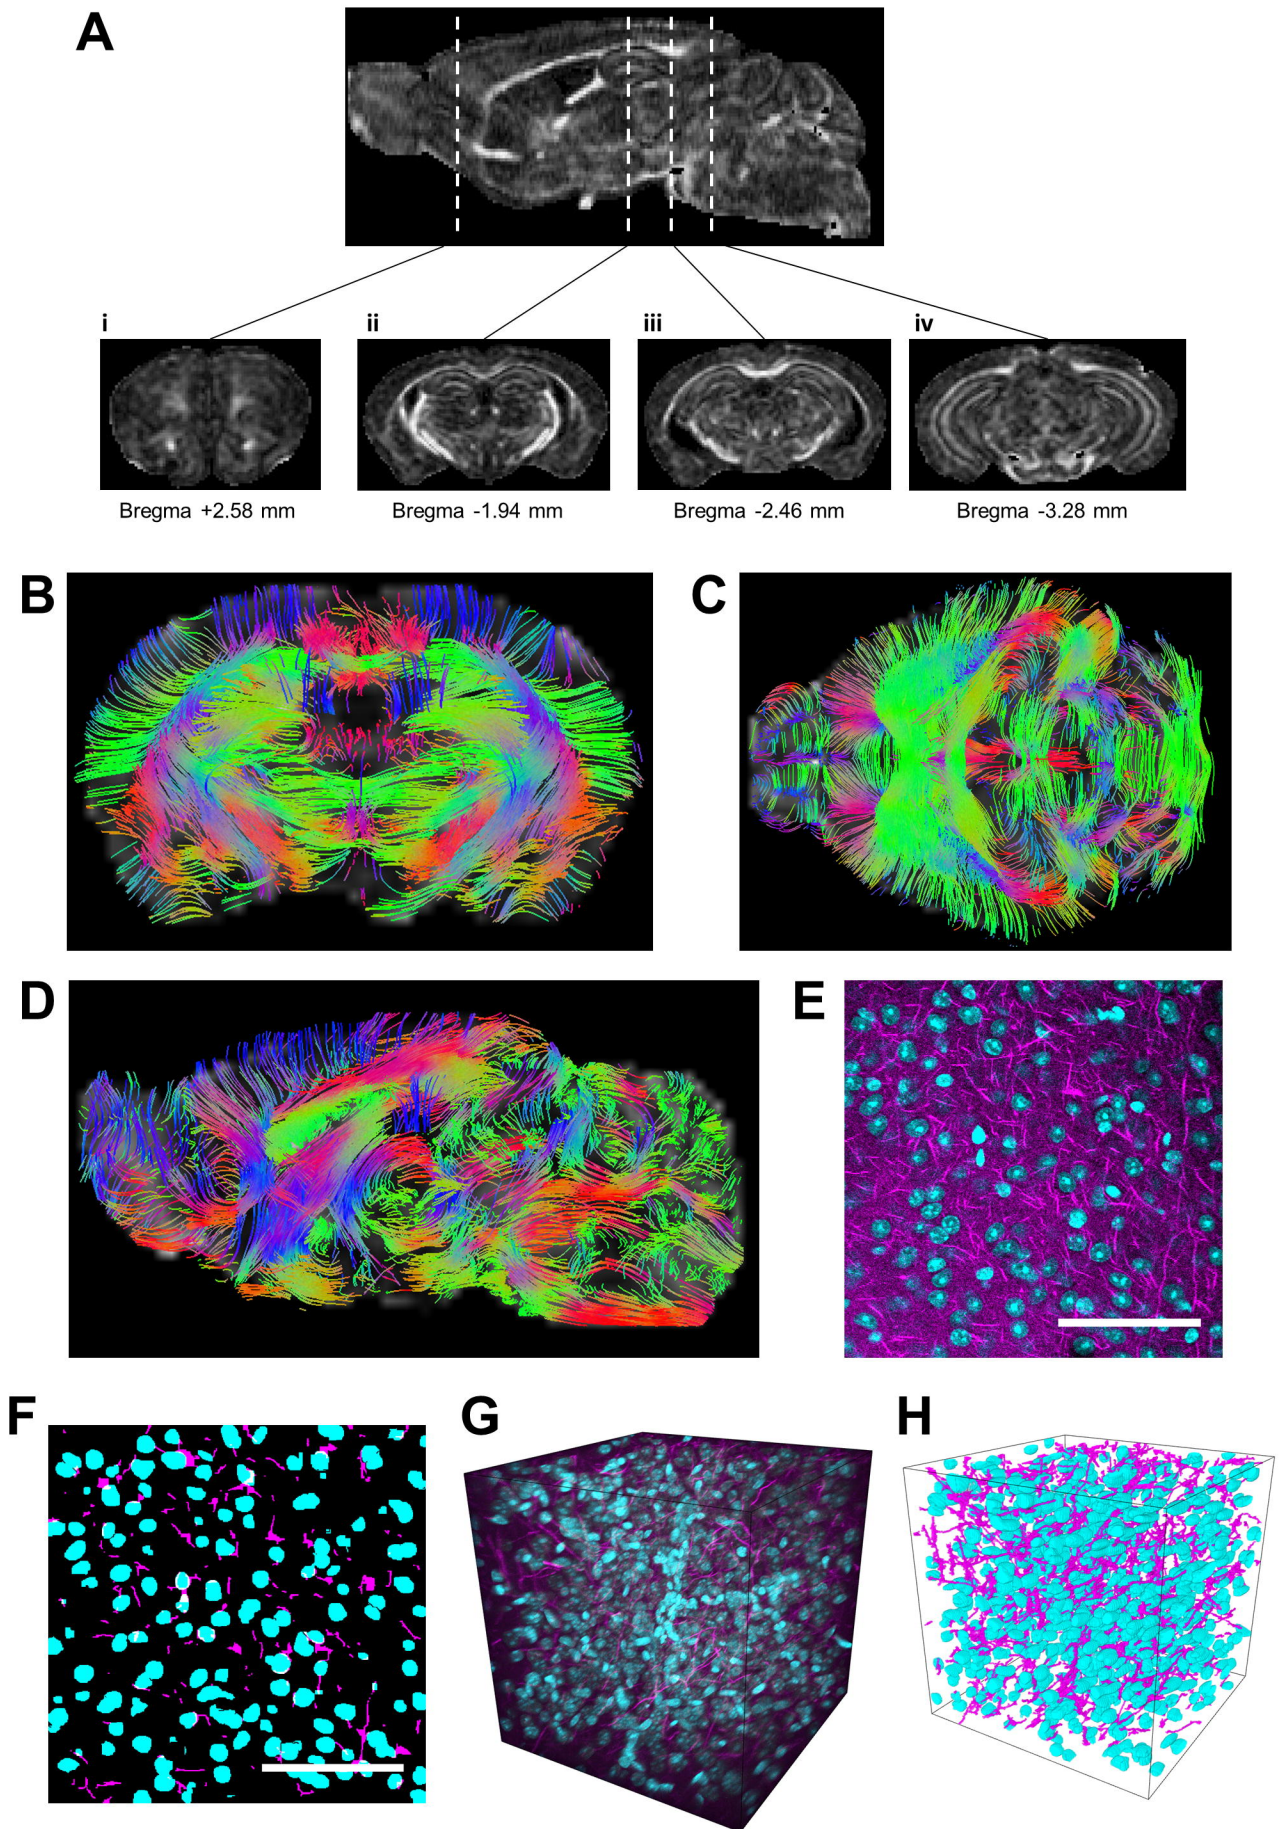



# Figure 2

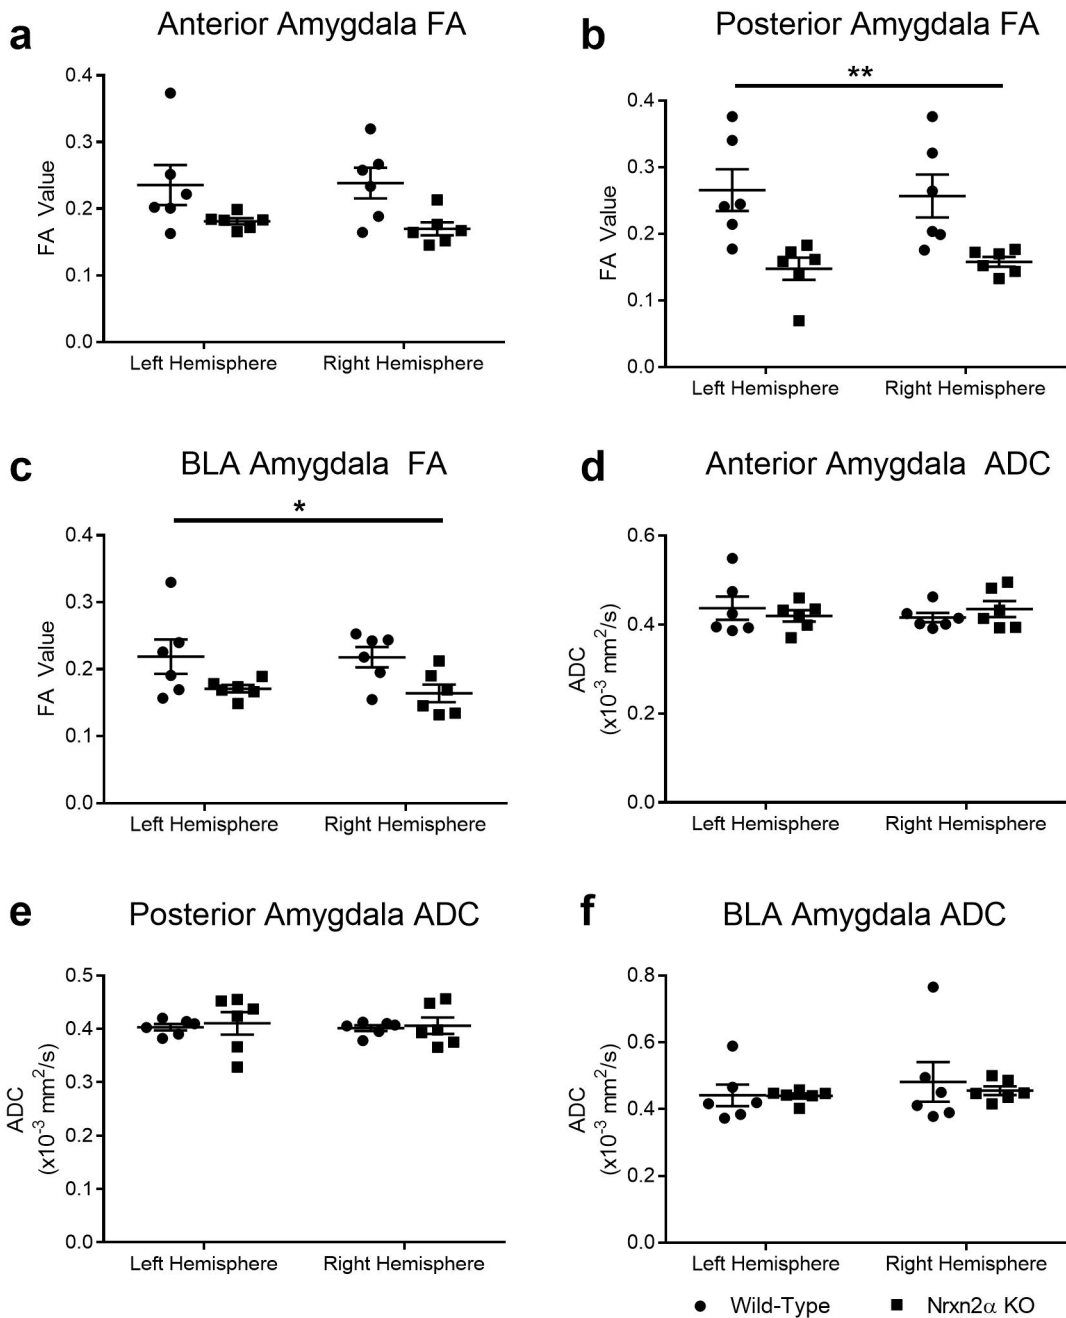

# Figure 3

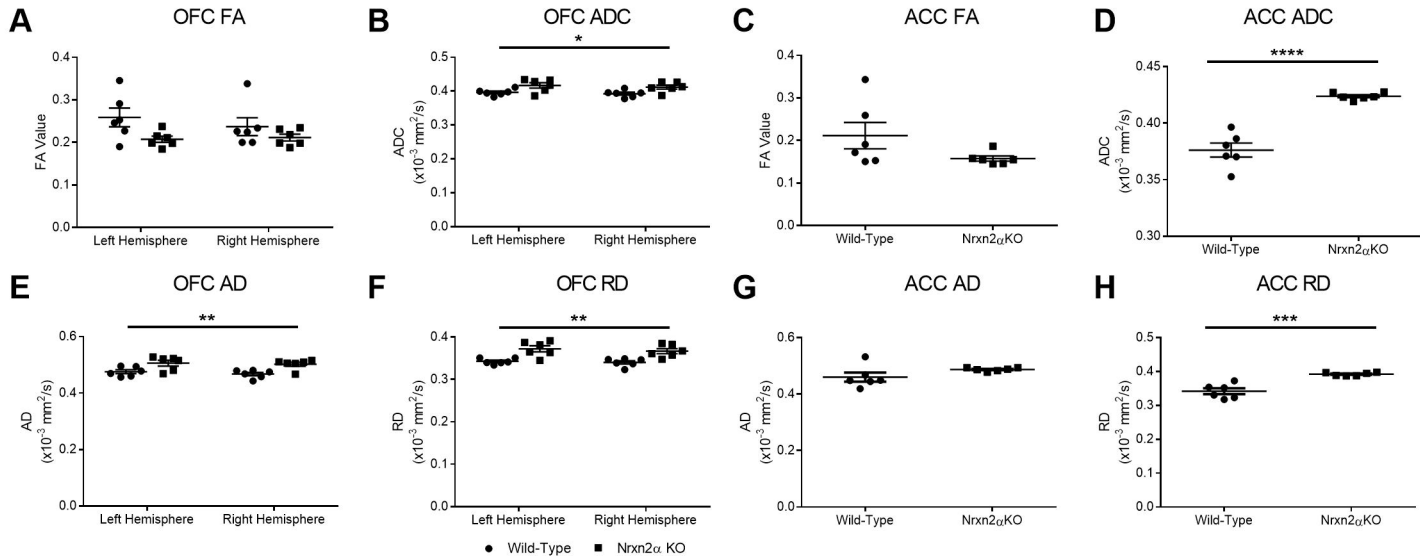

# Figure 4

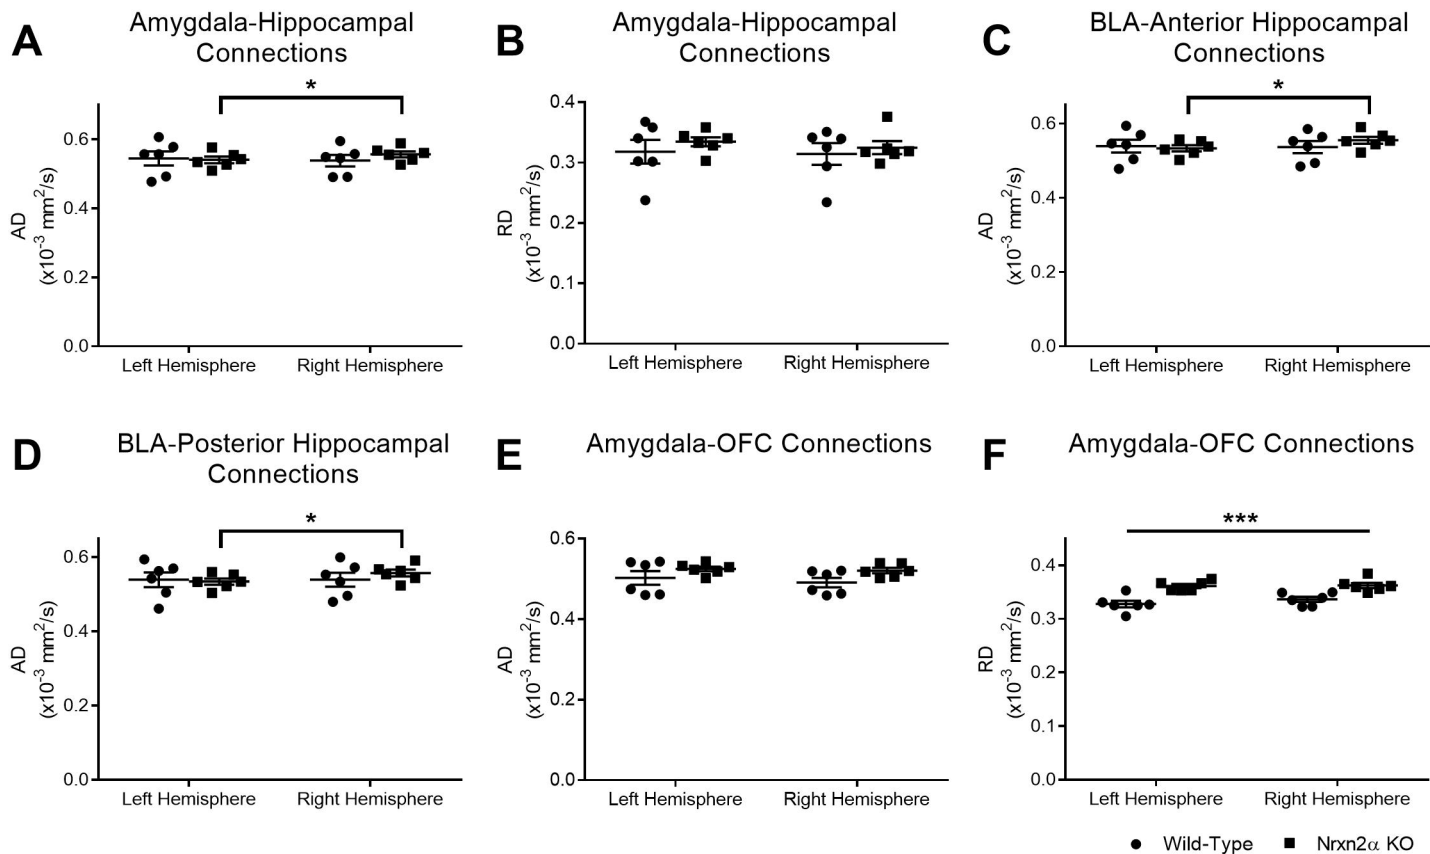

Figure 5

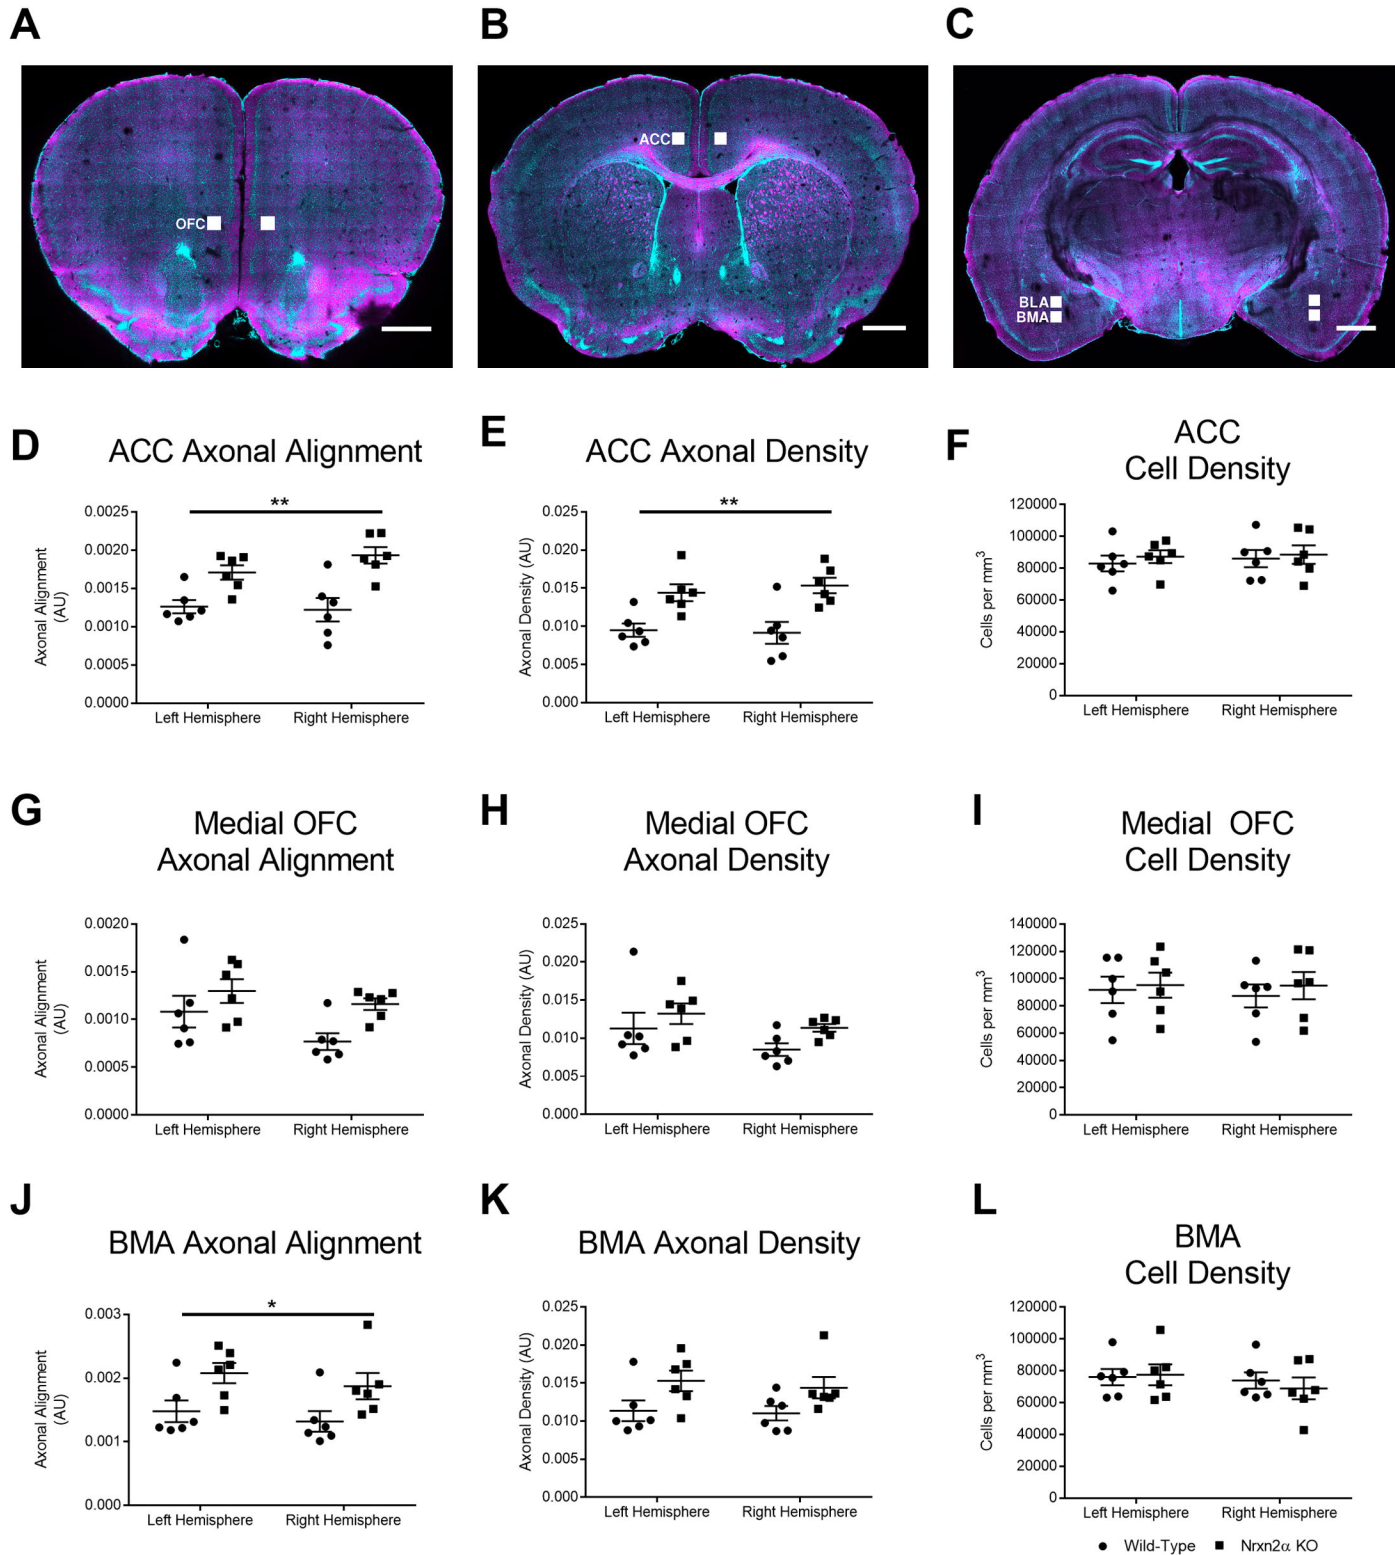

Source: https://www.biorxiv.org/content/biorxiv/early/2018/10/15/300806.full.pdf
