Pervolaraki et al.

1     **The within-subject application of diffusion tensor MRI and**  
2     **CLARITY reveals brain structural changes in *Nrxn2* deletion**  
3                                             **mice**

4  
5     Eleftheria Pervolaraki Ph.D<sup>1\*</sup>, Adam L. Tyson MRes<sup>2,3,4\*</sup>, Francesca Pibiri  
6     Ph.D<sup>5</sup>, Steven L. Poulter Ph.D<sup>5</sup>, Amy C. Reichelt Ph.D<sup>6</sup>, R. John Rodgers  
7     Ph.D<sup>7</sup>, Steven J. Clapcote Ph.D<sup>1</sup>, Colin Lever Ph.D<sup>5</sup>, Laura C. Andreae MBBS  
8                                             Ph.D<sup>2,3\*</sup>, James Dachtler Ph.D<sup>1,5\*</sup>

9  
10    <sup>1</sup>School of Biomedical Sciences, University of Leeds, LS2 9JT, UK

11    <sup>2</sup>Centre for Developmental Neurobiology, Institute of Psychiatry, Psychology  
12    and Neuroscience, King's College London, London SE1 1UL, UK

13    <sup>3</sup>MRC Centre for Neurodevelopmental Disorders, King's College London,  
14    London SE1 1UL, UK

15    <sup>4</sup>Department of Forensic and Neurodevelopmental Sciences, Institute of  
16    Psychiatry, Psychology and Neuroscience, King's College London, London  
17    SE5 8AF, UK

18    <sup>5</sup>Department of Psychology, Durham University, South Road, Durham, DH1  
19    3LE, UK

20    <sup>6</sup>Robarts Research Institute, Western University, London, Ontario, Canada,  
21    N6A 5B7, Canada

22    <sup>7</sup>School of Psychology, University of Leeds, LS2 9JT, UK

23  
24    \*These authors contributed equally.

25

Pervolaraki et al.

26 Address for Correspondence: Dr J Dachtler, Department of Psychology,

27 Durham University, South Road, Durham, DH1 3LE, UK. Email:

28 [james.dachtler@durham.ac.uk](mailto:james.dachtler@durham.ac.uk)

29

Pervolaraki et al.

30 **Abstract**

31 **Background**

32 Of the many genetic mutations known to increase the risk of autism spectrum  
33 disorder, a large proportion cluster upon synaptic proteins. One such family of  
34 presynaptic proteins are the neurexins (NRXN), and recent genetic and  
35 mouse evidence has suggested a causative role for *NRXN2* in generating  
36 altered social behaviours. Autism has been conceptualised as a disorder of  
37 atypical connectivity, yet how single-gene mutations affect such connectivity  
38 remains under-explored. To attempt to address this, we have developed a  
39 quantitative analysis of microstructure and structural connectivity leveraging  
40 diffusion tensor MRI (DTI) with high-resolution 3D imaging in optically cleared  
41 (CLARITY) brain tissue in the same mouse, applied here to the *Nrxn2α*  
42 knockout (KO) model.

43 **Methods**

44 Fixed brains of *Nrxn2α* KO mice underwent DTI using 9.4T MRI, and diffusion  
45 properties of socially-relevant brain regions were quantified. The same tissue  
46 was then subjected to CLARITY to immunolabel axons and cell bodies, which  
47 were also quantified.

48 **Results** DTI revealed decreases in fractional anisotropy and increases in  
49 apparent diffusion coefficient in the amygdala (including the basolateral  
50 nuclei), the anterior cingulate cortex, the orbitofrontal cortex and the  
51 hippocampus. Radial diffusivity of the anterior cingulate cortex and  
52 orbitofrontal cortex was significantly increased in *Nrxn2α* KO mice, as were  
53 tracts between the amygdala and the orbitofrontal cortex. Using CLARITY, we

Pervolaraki et al.

54 find significantly altered axonal orientation in the amygdala, orbitofrontal  
55 cortex and the anterior cingulate cortex, which was unrelated to cell density.

## 56 **Conclusions**

57 Our findings demonstrate that deleting a single neurexin gene (*Nrxn2a*)  
58 induces atypical structural connectivity within socially-relevant brain regions.  
59 More generally, our combined within-subject DTI and CLARITY approach  
60 presents a new, more sensitive method of revealing hitherto undetectable  
61 differences in the autistic brain.

62

## 63 **Key Words**

64 MRI, CLARITY, social, autism, axons, diffusion, structure, imaging

65

## 66 **Background**

67 Autism is a common neurodevelopmental disorder, which is highly heritable  
68 (1). While heritability is high, it is also clear that autism is highly polygenic.  
69 Around ~400-1000 genes are involved in autism susceptibility (2-5). Many of  
70 these genes cluster upon proteins relating to synaptic signaling (6). A family of  
71 presynaptic proteins garnering recent interest have been the neurexins  
72 (*NRXNs*). *NRXNs* are encoded by three genes (*NRXN1*, *NRXN2*, *NRXN3*;  
73 note that *CNTNAP1* and *CNTNAP2* are sometimes referred to as *NRXN4*), of  
74 which two major isoforms exist: the longer  $\alpha$  proteins with six  
75 laminin/neurexin/sex hormone (LNS) binding domains, and the shorter  $\beta$   
76 proteins with one LNS binding domain (7, 8).

77

Pervolaraki et al.

78 Mutations within all three *NRXN* genes have been linked to autism (6).  
79 Heterozygous deletions within *NRXN2* have been identified in a number of  
80 individuals with autistic phenotypes. These include an autistic boy and his  
81 father (who had severe language delay but not autism) who both had a  
82 frameshift mutation within exon 12 of *NRXN2* (9); a 570-kb de novo deletion  
83 of 24 genes at chromosome 11q13.1, including *NRXN2*, in a 21-year old man  
84 displaying a clinical phenotype including autistic traits (10); a 1.6Mb deletion  
85 at chromosome region 11q12.3-11q13.1, including *NRXN2*, in a 23-year old  
86 man with intellectual disability and behavioral problems (11); a de novo  
87 frameshift mutation identified in a Chinese man with autism spectrum disorder  
88 (ASD) (12), a 921 kb microdeletion at 11q13 in a 2 year old boy who had  
89 language and developmental delay (although did not meet the autism  
90 diagnosis criteria) (13) and a paternally inherited microRNA miR-873-5p  
91 variant in an ASD individual which altered binding affinity for several risk-  
92 genes including *NRXN2* and *CNTNAP2* (*NRXN4*) (14). Furthermore, recently,  
93 two large-scale reports have identified *NRXN2* with ASD risk. A study of 529  
94 ASD patients and 1,923 controls in a Chinese population identified two  
95 *NRXN2* variants which significantly increase ASD risk (15). The second study  
96 employed machine learning approaches across 5000 ASD families to rank the  
97 importance of ASD candidate genes, and ranks *NRXN2* in the top ~0.5% of  
98 genes, i.e. 113<sup>th</sup> (16). For comparison, *NRXN1*, for which the evidence base  
99 for its links to ASD is broader and stronger, ranks 45, and *CNTNAP2* ranks  
100 211<sup>th</sup> (16). Consistent with these association studies, we and others have  
101 previously found that homozygous or heterozygous deletion of *Nrxn2α*  
102 induces impairment in social approach and social recognition (17-19). In

Pervolaraki et al.

103 summary, although mutations within *NRXN2* are rare, understanding how they  
104 may drive social, ASD-relevant behavioural changes is important. One  
105 important goal is to help elucidate how apparently convergent  
106 pathophysiology in ASD emerges despite marked genetic heterogeneity  
107 (Insert ref Geschwind & State, 2015 cited above); mapping brain alterations  
108 driven by different single genes is thus a crucial task.

109

110 Currently it is unknown whether deletion of *Nrxn2 $\alpha$*  changes the brain's  
111 microstructure and connectivity. One previous study found coarse alterations  
112 to cell layer thickness within the hippocampus of *Nrxn2 $\alpha$*  homozygous KOs  
113 (20). However, cell density measurements are unlikely to reveal the true  
114 extent of changes within the autistic brain. Within the current study, we have  
115 addressed this by developing a dual imaging approach (DTI and CLARITY)  
116 that quantifies the alignment and density of white matter, applied here to brain  
117 regions known to support social behavior in a mouse model of autism.

118

119 Diffusion tensor MRI (or DTI) is based upon the movement of water  
120 molecules, a measure that is termed fractional anisotropy (FA). Apparent  
121 diffusion coefficient (ADC) is similar to FA, but quantifies diffusion restriction  
122 as opposed to the spatial symmetry of diffusion. This approach has been used  
123 to explore neuropathological markers in autistic patients; alterations in  
124 myelination, axonal abundance, size and orientation all modify FA and ADC  
125 values (21-23). Using the preferred direction of the diffusion of tensors  
126 between brain regions can be used to explore their potential connection.  
127 Quantification of those computed streamlines by FA and axial and/or radial

Pervolaraki et al.

128 diffusion can indicate impairments in regional structural connectivity. Since  
129 aberrant brain connectivity is likely a core feature of autism (24), we reasoned  
130 that the candidate method for probing the autistic brain should combine  
131 tractographic techniques. Accordingly, here, we combined high resolution  
132 imaging of labelled neuronal tracts in brains rendered transparent by  
133 CLARITY with DTI.

134

135 CLARITY is a recent development that renders tissue optically transparent  
136 and macromolecule permeable (25). This permits antibody staining and  
137 imaging of much larger tissue volumes than possible under traditional  
138 immunofluorescence techniques. By examining fiber orientation without  
139 sectioning-related artefacts and biases, axonal staining in cleared tissue  
140 affords a deeper understanding of the microstructure and structural  
141 connectivity of a brain region.

142

143 Given the social impairments found within *Nrxn2 $\alpha$*  mice, we sought to  
144 examine those brain regions most closely linked with social behavior (See  
145 Supplemental Materials). Briefly, we identified four regions of interest (ROIs):  
146 the amygdala, and three brain regions strongly and directly connected to the  
147 amygdala; the hippocampus, orbitofrontal cortex (OFC), and anterior cingulate  
148 cortex (ACC). As predicted, structural connectivity was abnormal in *Nrxn2 $\alpha$*   
149 mice.

150

151 **Methods**

152 **Ethics**

Pervolaraki et al.

153 All procedures were approved by the University of Leeds and Durham  
154 University Animal Ethical and Welfare Review Boards and were performed  
155 under UK Home Office Project and Personal Licenses in accordance with the  
156 Animals (Scientific Procedures) Act 1986.

157

## 158 **Animals**

159 Full details of the animals, their background, genotyping and housing can be  
160 found elsewhere (17). In brief, male B6;129-  
161 *Nrxn3tm1Sud/Nrxn1tm1Sud/Nrxn2tm1Sud/J* mice (JAX #006377) were  
162 purchased from the Jackson Laboratory and outbred once to the  
163 C57BL/6NCrl strain (Charles River, Margate, United Kingdom) to obtain mice  
164 that were individually *Nrxn2α* KO heterozygotes. Subsequently, HET knockout  
165 males were bred with HET females (cousin mating).

166

## 167 **Experimental animals**

168 6 adult wild-type males (Charles River, Margate, UK) and 6 age matched  
169 littermate *Nrxn2α* KO homozygotes (71 days  $\pm$  6 days old (SEM)) were  
170 perfused-fixed with 4% paraformaldehyde (PFA) in 0.1 M phosphate buffer  
171 saline (PBS) and the brains extracted. The brains were immersed in 4%  
172 PFA/0.1 M PBS for a minimum of 48 hours prior to imaging. During imaging,  
173 the samples were placed in custom-built MR-compatible tubes containing  
174 Fomblin Y (Sigma, Poole, Dorset, UK).

175

176 Due to the relatively low variance, and owing to the complexity and  
177 methodological nature in our experimental approach, we achieved



Pervolaraki et al.

178 significance by groups of 6 (power provided in Results). No data was  
179 excluded from the study. Sample randomisation was performed by JD, with  
180 experimenters (EP and ALT) blinded to genotype.

181

## 182 **Data Acquisition**

183 Image acquisition has been described elsewhere (26). Each brain was 3D  
184 imaged using the protocol TE: 35 ms, TR: 700 ms and 10 signal averages.  
185 The field of view was set at 128 x 128 x 128, with a cubic resolution of 100  
186  $\mu\text{m}/\text{pixel}$  and a b value of 1200  $\text{s}/\text{mm}^2$ . Further details can be found in  
187 Supplemental Materials.

188

189

## 190 **Image Processing**

191 Parsing of the raw data was semi-automated using DSI Studio, in order to  
192 obtain b-values for every normalized gradient vector on the x, y and z  
193 orientations. Unwanted background, setting a threshold, smoothing of the  
194 data and definition of tissue boundaries was performed prior to the  
195 reconstruction of the final 3D image. DTI analysis parameters were calculated  
196 as previously described (28).

197

198 The *ex vivo* mouse brain 3D diffusion-weighted images were reconstructed  
199 from the Bruker binary file using DSI Studio (<http://dsi-studio.labsolver.org>)  
200 (29). Direction Encoded Colour Map (DEC) images were generated by  
201 combining the information from the primary eigenvectors, diffusion images  
202 and the FA. Images of the primary vectors and their orientation were

Pervolaraki et al.

203 reconstructed and superimposed on corresponding FA images to guide the  
204 segmentation of discrete anatomical locations according to the brain atlas  
205 (Figure 1B-D). Region of interest definition was performed by author EP and  
206 corroborated independently by JD, with region area compared between the  
207 experimenters (data not shown). We identified a canonical coronal slice (100  
208  $\mu\text{m}$ ) for a given ROI from the standard mouse brain atlas (Figure 1A-D; Supp.  
209 Figure 1) (27). We analysed three coronal slices centred on the canonical  
210 slice, totalling 300  $\mu\text{m}$  in anterior/posterior extent. For whole brain region  
211 analysis, we used a similar approach, except regions were segmented for  
212 every other slice in the anterior to posterior extent. The DSI Studio DTI  
213 reconstruction characterizes the major diffusion direction of the fibre within the  
214 brain (30, 31). Extraction of FA (calculated (26)) and ADC was performed  
215 within selected segmented brain areas for every 3D reconstructed mouse  
216 brain.

217

### 218 **Regions of Interest (ROIs)**

219 Our DTI approach was to undertake an *a posteriori* analysis of neural  
220 organization in regions of interest (ROIs) identified by previous literature as  
221 socially-relevant. Given the social impairments found within *Nrxn2 $\alpha$*  mice, for  
222 the current study, we identified the brain regions of interest (ROIs) most  
223 closely linked with social behavior, using previously published reports of brain  
224 region involvement in social behaviour. Quantification of c-Fos  
225 immunoreactivity has highlighted the importance of several amygdala nuclei  
226 (including the basolateral) following social exposure (32), but also the anterior  
227 cingulate cortex (ACC), prefrontal cortex and the hippocampus (33). Lesions

Pervolaraki et al.

228 to the primate amygdala alter social interactions (34, 35), and amygdala  
229 neurons in primates including humans increase firing rates during social  
230 scenarios (36-38). Consistent with these animal studies, amygdala damage in  
231 humans (39) and amygdala dysfunction in ASD patients (40) impair social  
232 responses. Other socially-important brain regions have also been proposed.  
233 Notably, several studies have implicated the rodent hippocampus in social  
234 behavior, including social memory and sociability (41-43). For instance,  
235 intrahippocampal administration of neurolide-2, which interacts with  $\alpha$ -  
236 neurexin, specifically impairs sociability, but not anxiety and spatial learning in  
237 rats (44). These findings are consistent with reports of social deficits in  
238 humans with hippocampal damage (45) and hippocampal abnormalities in  
239 ASD (46, 47). Finally, several studies link the frontal cortex, particularly the  
240 orbitofrontal cortex, which is strongly anatomically connected with the  
241 amygdala(48), to social processing (49, 50), consistent with findings of  
242 abnormalities in orbitofrontal cortex in ASD (48, 51). Control regions of the  
243 primary motor cortex (M1), primary sensory cortex (S1) and the barrel field  
244 were chosen for CLARITY (Supp. Figure 12N-O).

245

## 246 **CLARITY**

247 Following MR imaging, the brains were washed in PBS to remove all Fomblin  
248 Y and then incubated for 7 days in hydrogel solution at 4°C prior to  
249 polymerisation at 37°C for 3.5 hours. The tissue was cut into 1.5 mm coronal  
250 sections using a custom 3D-printed brain-slicing matrix based on MRI scans  
251 of an adult C57BL/6 mouse brain (52) and incubated in clearing buffer for 24  
252 days at 37°C with shaking. The cleared tissue was then washed in PBSTN<sub>3</sub>

Pervolaraki et al.

253 (0.1% TritonX-100 and 1.5 mM sodium azide in PBS) for 24 hours at room  
254 temperature and incubated in primary antibody solution (neurofilament (Aves  
255 NF-H) 1:100 in PBSTN<sub>3</sub>) at 37°C with shaking for 13 days. Samples were  
256 washed, and then incubated in secondary antibody (AlexaFluor 488 goat anti-  
257 chicken IgY) as per the primary. Sections were washed again, and incubated  
258 in 3.6 µM DAPI (4',6-diamidino-2-phenylindole) followed by 85% glycerol in  
259 PBS for refractive index matching.

260

261 Cleared samples were imaged using a Zeiss 7MP multiphoton microscope at  
262 770 nm using a 20x objective lens (W Plan-Apochromat, NA 1.0, WD 1.7  
263 mm). Images (512 x 512 x 512 voxels or 265 x 265 x 265 µm with an isotropic  
264 resolution of 520 nm) were acquired in ACC, basolateral (BLA) and  
265 basomedial amygdala and OFC) in both hemispheres. DAPI and  
266 neurofilament signal was segmented into cell nuclei and axons, and the  
267 resulting binary images were used to generate values for cell density, axonal  
268 density and axonal alignment.

269

270 Full CLARITY methodological details are available within Supplemental  
271 Materials.

272

### 273 **Data Availability**

274 Codes to analyse CLARITY datasets are made available by author LCA by  
275 email request to either JD or LCA, subject to reference to the current paper.  
276 The datasets used and/or analysed during the current study are available  
277 from the corresponding author on reasonable request.

Pervolaraki et al.

278

## 279 **Data Analysis**

280 All data are expressed as mean  $\pm$  standard error of the mean (SEM). To  
281 assess the variance between genotypes within a single brain structure across  
282 hemispheres (given the importance of hemispheric differences in ASD (53)),  
283 data was analyzed by within subject repeated measures two-way ANOVAs,  
284 with Sidak multiple corrections employed on post hoc testing, or unpaired T-  
285 tests. To correct for multiple comparisons, we employed the Benjamini-  
286 Hochberg Procedure (corrected P values stated). Non-significant statistical  
287 results, particularly hemisphere comparisons, can be found in Supplemental  
288 Materials. Statistical testing and graphs were made using GraphPad Prism  
289 version 6 and SPSS v22.

290

## 291 **Results**

### 292 ***Nrxn2* $\alpha$ deletion disrupts DTI measures of microstructure in social brain** 293 **regions**

294 To assess whether *Nrxn2* $\alpha$  deletion alters gross morphology, we quantified  
295 whole brain volume using DTI. We found total brain volume for wild-types and  
296 *Nrxn2* $\alpha$  KOs was similar ( $456.0 \pm 14.76$  vs.  $466.2 \pm 11.0$  mm<sup>3</sup> (respectively);  
297  $t_{(10)} = 0.55$ ,  $p = 0.59$ ). Thus, *Nrxn2* $\alpha$  deletion does not change total brain size.

298

299 To quantitatively measure DTI, we examined FA and ADC. FA analyses  
300 changes in the linear orientation (i.e. along an axonal tract), whereas ADC  
301 (mean diffusivity) averages diffusion in all directions (i.e. the X, Y and Z axis),  
302 which is sensitive to changes such as altered alignment. The amygdala is

Pervolaraki et al.

303 critically important for social behaviours. To assess whether amygdalar  
304 alterations might account for social impairments in *Nrxn2α* KO mice, we  
305 segmented the whole amygdala structure and the basolateral nuclei along the  
306 anterior-posterior axis.

307

308 The posterior amygdala showed a significant reduction in FA in *Nrxn2α* KO  
309 mice (Figure 2A-B) (anterior: genotype ( $F_{(1, 10)} = 5.81$ ,  $p = 0.056$ ); posterior:  
310 genotype ( $F_{(1, 10)} = 11.2$ ,  $p = 0.025$ , power = 85.4%)). This FA reduction was  
311 also observed specifically in the BLA, a region strongly associated with social  
312 behaviours (Figure 2C; genotype ( $F_{(1, 10)} = 6.31$ ,  $p = 0.049$ , power = 62.1%)).  
313 ADC was not significantly altered in the anterior amygdala, posterior  
314 amygdala or BLA (Figure 2D-F; all genotype:  $F_{(1, 10)} < 1$ ).

315

316 We conducted the same analysis for the two prefrontal regions implicated in  
317 social behaviour and autism: the OFC and ACC. The pattern of results was  
318 similar for both regions: FA was not altered, while ADC was increased in the  
319 OFC (Figure 3A-B) and the ACC (Figure 3C-D). FA for the OFC was not  
320 significantly altered (genotype: ( $F_{(1, 10)} = 3.04$ ,  $p = 0.079$ )) but ADC was  
321 significantly increased (genotype: ( $F_{(1, 10)} = 8.20$ ,  $p = 0.043$ , power = 73.3%)).  
322 The ACC was unaltered in FA ( $t_{(10)} = 1.70$ ,  $p = 0.08$ ) but had significantly  
323 increased ADC ( $t_{(10)} = 7.52$ ,  $p = 0.002$ , power = 99.9%).

324

325 We sought to examine whether changes in the amygdala (Supp. Figure 4),  
326 OFC or ACC FA and ADC were driven by diffusion in the primary axis ( $\lambda_1$ ) or  
327 the radial orientations ( $\lambda_2$  and  $\lambda_3$ ) by characterisation of AD (primary) and RD

Pervolaraki et al.

328 (radial). Within the OFC (Figure 3E-F), AD was significantly increased  
329 (genotype: ( $F_{(1, 10)} = 10.74$ ,  $p = 0.029$ , power = 83.9%)), as was RD (genotype:  
330 ( $F_{(1, 10)} = 18.26$ ,  $p = 0.009$ , power = 97.0%)), suggesting that both along-tract  
331 diffusion and tract branching were affected. However, in the ACC (Figure 3G-  
332 H), only RD was significantly increased ( $t_{(10)} = 5.65$ ,  $p = 0.007$ , power =  
333 99.9%), with no alteration in AD ( $t_{(10)} = 1.69$ ,  $p = 0.09$ ). Increased RD is  
334 thought to reflect demyelination or changes in axonal density or orientation  
335 (54).

336

### 337 **DTI reveals altered hippocampal microstructure in *Nrxn2α* KO mice**

338 The hippocampus has recently been associated with social motivation and  
339 social recognition. Since the specific contributions of the dorsal and ventral  
340 hippocampal poles remain unclear, we segmented the whole hippocampus  
341 into anterior (Bregma -1.94 mm), middle (Bregma -2.46 mm) (both dorsal) and  
342 posterior (Bregma -3.28 mm) (incorporating ventral regions) levels.

343

344 FA values in the anterior, mid and posterior hippocampus were not  
345 significantly altered (see Supp. Table 1 for statistics and Supp. Figure 5A-C).  
346 Similarly, ADC was unaltered for the anterior and mid hippocampus (Supp.  
347 Table 1 for statistics and Supp. Figure 5D-E), but was significantly increased  
348 in *Nrxn2α* KO mice in the posterior hippocampus (genotype: ( $F_{(1, 10)} = 8.80$ ,  $p$   
349 = 0.036, power = 76.6%); Supp. Figure 5F). There were no significant  
350 genotype differences in AD in any of the hippocampal regions (Supp. Figure  
351 6A-C). However, RD was significantly increased in the posterior hippocampus  
352 in *Nrxn2α* KO mice (genotype: ( $F_{(1, 10)} = 10.83$ ,  $p = 0.027$ , power = 84.2%;

Pervolaraki et al.

353 Supp. Figure 6F) but not in anterior and mid regions (see Supp. Table 1;  
354 Supp. Figure 6D-E). The theoretical approach undertaken hitherto was to  
355 segment ROIs using a single coronal plane (as outlined in the Methods),  
356 which subsequently allowed for the same anterior/posterior region to be  
357 analysed by CLARITY. However, this restricted analysis could theoretically  
358 miss diffusion differences across a whole brain region (as in, for example, the  
359 entire anterior to posterior ACC). As a further quantification, we segmented  
360 whole regions for the amygdala (Supp. Figure 7), the anterior and posterior  
361 hippocampus (Supp. Figure 8) and the OFC and ACC (Supp. Figure 9). We  
362 found that although there were more statistical differences between the  
363 genotypes for the ‘whole’ anterior hippocampus region compared to the  
364 ‘single plane’ analysis, overall the two analysis methods suggested broadly  
365 similar structural alterations.

366

367 Lastly, given DTI is most commonly associated with analysis of white matter  
368 tracts, we also quantified the corpus callosum. Changes within the corpus  
369 callosum have repeatedly been highlighted in autism (55, 56), including  
370 mouse models of autism (57, 58). Here, we found significantly increased FA  
371 and reduced ADC in *Nrxn2α* KO mice, which were driven by a significant  
372 reduction in RD (Supp. Figure 10).

373

374 In summary, the microstructural measures most altered by *Nrxn2α* deletion  
375 were increases in ADC and RD, including in the hippocampus, in line with  
376 recent work suggesting a role for ventral hippocampus in social memory (43).

377



Pervolaraki et al.

378 **DTI tractography reveals *Nrxn2α* deletion affects structural connectivity**  
379 **between the amygdala and orbitofrontal cortex**

380 The amygdala is strongly and bidirectionally connected to both the  
381 hippocampus (59) and the OFC (60). As all three regions are themselves  
382 important for social behaviour, and autism is thought to be, at least in part,  
383 related to abnormal structural connectivity (24), we performed tractography  
384 analysis between the amygdala (and specifically the BLA) and the  
385 hippocampus, and between the amygdala and the OFC.

386

387 From the anterior amygdala, we examined the diffusivity (AD and RD) of  
388 connections to the anterior and posterior hippocampus (Supp. Figure 11). We  
389 did not observe differences in RD in the tracts connecting the amygdala with  
390 the hippocampus (see Supp. Table 2 for non-significant statistics). Although  
391 AD between the anterior amygdala and anterior hippocampus did not differ by  
392 genotype, there was a significant interaction between genotype and  
393 hemisphere (genotype x hemisphere ( $F_{(1, 10)} = 12.12$ ,  $p = 0.023$ , power =  
394 88.0%; Figure 4A); post hoc analysis shows this was driven by larger right-vs-  
395 left hemisphere AD values within the *Nrxn2α* KOs only ( $p = 0.012$ ). This  
396 difference could be driven by the BLA; there was increased AD in both the  
397 BLA/anterior hippocampus tracts (genotype x hemisphere ( $F_{(1, 10)} = 10.53$ ,  $p =$   
398 0.032, power = 83.2%) and the BLA/posterior hippocampus tracts (genotype x  
399 hemisphere ( $F_{(1, 10)} = 12.97$ ,  $p = 0.020$ , power = 90%), which again was  
400 related to larger right-vs-left hemisphere values in the *Nrxn2α* KOs  
401 (BLA/anterior hippocampus:  $p = 0.004$  and BLA/posterior hippocampus:  $p =$   
402 0.001, (Figure 4C-D)) but not the wild-type (anterior:  $p = 0.87$ ; posterior:  $p =$

Pervolaraki et al.

403 1.00). These results indicate that there are differences for the structural  
404 connectivity of the amygdala with the hippocampus within the left and right  
405 hemisphere in *Nrxn2α* KO mice, with increased axial diffusivity in the right  
406 hemisphere. This finding is particularly interesting, as hemispheric differences  
407 in functional connectivity, particularly affecting connections from the right  
408 amygdala, have been found children with ASD (61, 62).

409

410 Finally, we tested connections between the amygdala and the OFC. For AD,  
411 wild-type and *Nrxn2α* KO mice did not differ by genotype (Figure 4E:  
412 genotype: ( $F_{(1, 10)} = 2.85$ ,  $p = 0.09$ ), hemisphere: ( $F_{(1, 10)} = 6.38$ ,  $p = 0.052$ ). RD  
413 was strikingly higher in *Nrxn2α* KO mice (Figure 4F: genotype: ( $F_{(1, 10)} = 26.06$ ,  
414  $p = 0.023$ , power = 99.5%)), indicative of a change in demyelination, axonal  
415 density or orientation (54).

416

417 **CLARITY reveals fibre disruption in *Nrxn2α* KO mice in the amygdala,**  
418 **orbitofrontal cortex, and anterior cingulate cortex**

419 To further explore the differences as revealed by DTI, we performed CLARITY  
420 on the same brain tissue used in DTI, and stained with neurofilament and  
421 DAPI to label axons and cell bodies, respectively. We were then able to derive  
422 both the axonal alignment (as in, the geometric alignment of axons (from  
423 linear alignment to random) within 3D space (see Supp. Figure 2)) and  
424 density of the stained fibers, in addition to the cell density.

425

426 The pattern of results was broadly similar for both the prefrontal cortical ROIs.

427 That is, first, axonal alignment was increased in *Nrxn2α* KO mice in the ACC

Pervolaraki et al.

428 (Figure 5D: genotype: ( $F_{(1, 10)} = 16.06$ ,  $p = 0.011$ , power = 94.9%) but not the  
429 OFC (Figure 5G: genotype: ( $F_{(1, 10)} = 5.56$ ,  $p = 0.059$ ). Second, this could not  
430 be explained by a difference in cell density, since that was similar between the  
431 KO and wild-type mice in both the ACC (Figure 5F: genotype: ( $F_{(1, 10)} < 1$ ),  
432 hemisphere: ( $F_{(1, 10)} = 1.73$ ,  $p = 0.11$ ) and the OFC (Figure 5H: genotype: ( $F_{(1,$   
433  $10) = 3.09$ ,  $p = 0.08$ ). An increase in axonal density in *Nrxn2α* KO mice was  
434 reliable in the ACC (Figure 5E: genotype: ( $F_{(1, 10)} = 14.64$ ,  $p = 0.014$ , power =  
435 93.0%), but not in the OFC (Figure 5H: genotype: ( $F_{(1, 10)} = 3.09$ ,  $p = 0.083$ ).

436

437 We further examined two regions of the anterior amygdala, the BLA and  
438 basomedial (BMA) nuclei, where altered social cellular responses have been  
439 reported in human autism (38). We did not observe any significant differences  
440 for axonal alignment or fibre density in the BLA (see Supp. Figure 12A-C), but  
441 whereas axonal alignment (Figure 5J, genotype:  $F_{(1, 10)} = 7.70$ ,  $p = 0.045$ ,  
442 power = 70.6%) but not axonal density (Figure 5K: genotype: ( $F_{(1, 10)} = 6.10$ ,  $p$   
443 = 0.054) was increased in *Nrxn2α* KO mice in the basomedial nuclei, while  
444 cell density was unaffected (Figure 5L: genotype: ( $F_{(1, 10)} < 1$ ). Alterations in  
445 axonal alignment and density as directly revealed by CLARITY could explain  
446 the increases in diffusivity and RD in the prefrontal regions, as measured by  
447 DTI.

448

449 To test the specificity of these alterations, we examined three further brain  
450 regions; the primary motor cortex (M1; Supp. Figure 12D-F), the primary  
451 somatosensory cortex (S1; Supp. Figure 12H-J) and the barrel field (BF;  
452 Supp. Figure 12K-M). Interestingly, although there were differences between

Pervolaraki et al.

453 the hemispheres, there were no statistical differences between the genotypes  
454 or genotype x hemisphere interactions for any measure (Supp. Table 3),  
455 suggesting some specificity of the alterations in social-relevant brain regions  
456 in *Nrxn2α* KO mice.

457

458 In summary, in both the prefrontal ROIs, namely the OFC, and the ACC, DTI  
459 showed that ADC and RD were increased in *Nrxn2α* KO mice, likely related to  
460 complementary analysis from CLARITY showing that axonal alignment was  
461 altered in *Nrxn2α* KO mice in both prefrontal ROIs.

462

## 463 **Discussion**

464 Interestingly, the single-gene deletion of *Nrxn2α* captures several key aspects  
465 of human ASD. In terms of behaviour, three studies have now found social  
466 deficits associated with *Nrxn2α* KO (17-19); in terms of brain structure, as  
467 reported here (summarised below), the *Nrxn2α* KO mouse model shows  
468 altered microstructure and structural connectivity patterns in socially-relevant  
469 brain regions reminiscent of changes in ASD.

470

471 A DTI approach has been used for some time to explore neuropathological  
472 markers in autistic patients; alterations in myelination, axonal abundance, size  
473 and orientation all modify FA and ADC values (21, 63), specifically by  
474 reducing amygdala FA (23, 63), and have been used as a quantitative  
475 measure of changes to brain white matter integrity (23, 24). Increased cortical  
476 ADC typically indexes reduced functionality: e.g. increased hippocampal ADC  
477 is associated with mild cognitive impairment (64, 65) and predicts verbal and

Pervolaraki et al.

478 visuospatial memory in old healthy controls (66). Furthermore, both increased  
479 RD of various white matter tracts (67, 68) and increased whole-brain AD (68)  
480 have been observed in ASD. The *Nrxn2α* KO mouse reproduces many of  
481 these specific changes, including reduced FA and increases in ADC, AD and  
482 RD. Whole brain increases in ADC, AD and RD (but not FA) have been  
483 reported in ASD children, as have increases in ADC and RD in frontal cortex  
484 tracts (68). This is in agreement with other studies noting increased ADC in  
485 frontal cortex in ASD (63), as we observed here in both the prefrontal regions  
486 examined, the OFC and ACC. Likewise, FA was reduced in the amygdala in  
487 ASD children and adolescents (69), and right-sided lateralisation of abnormal  
488 amygdala/hippocampus-related connections, as seen in our *Nrxn2α* KO  
489 mouse, has been noted in high-functioning adolescents/adults with autism  
490 (70).

491

492 Whilst the current study specifically explores structural connectivity, it is  
493 difficult to extrapolate as to what these structural changes mean for functional  
494 connectivity in the *Nrxn2α* KO mouse. Hyper and hypo connectivity theories of  
495 autism have remained contentious, and vary in humans by cohort studied  
496 (e.g. by age of participant) (71). Further, in studies that have combined resting  
497 state functional MRI (rsfMRI) and DTI, functional and structural connectivity  
498 do not always overlap (72-74). Our current data suggests that DTI differences  
499 can be explained by altered axonal patterning (i.e. CLARITY). Others have  
500 explored the biological mechanisms linking structural connectivity to altered  
501 functional connectivity. Zhan et al. (2014) found that deletion of the  
502 chemokine receptor *Cx3cr1* resulted in impaired synaptic pruning of long-

Pervolaraki et al.

503 range connections during development, which manifested as impaired social  
504 behavior caused by decreased frontal functional connectivity, reduced  
505 synaptic multiplicity and weakened coherence of local field potentials (75).  
506 Thus, it is possible that impairments in neuronal structural maturation can  
507 generate functional connectivity deficits that encapsulate core autism  
508 phenotypes.

509

510 Our findings corroborate these quantifications of clinical autism, but highlights  
511 the question of what do the different measures of ADC, FA, AD and RD  
512 represent? Importantly, we observed these microstructural changes in various  
513 socially-relevant brain regions against a background of unchanged cell  
514 density in all our study's ROIs. Unexpectedly, this highlights the power of our  
515 new approach. Dudanova et al. (2007) concluded from measures of cell  
516 counting and cortical cell layer thickness that *NRXN2* played little role in  
517 normal brain development (20). Indeed, in earlier studies, it was suggested  
518 that deletion of all *Nrxns* was unlikely to affect synaptic development but  
519 instead disrupts synaptic function (76). We propose that measures such as  
520 two-dimensional cell counting may be underestimating the impact of genetic  
521 mutations upon normal development. By staining cleared brain tissue with a  
522 nuclear marker and performing automated three-dimensional cell counting, we  
523 found no effect of *Nrxn2a* deletion on cell density in any region of interest  
524 examined. But this belies the clear effects upon microstructure integrity across  
525 multiple regions as measured by both DTI and CLARITY, and its specificity;  
526 only the socially-relevant brain regions we tested were disrupted, and not  
527 primary sensory or motor regions. Future studies will benefit from employing

Pervolaraki et al.

528 more sensitive measures of brain structural connectivity to determine the  
529 relevance of genetic mutations in development.

530

531 FA and ADC can be influenced by changes in axonal density and alignment  
532 (e.g. by myelination, demyelination, axonal damage, loss of white matter  
533 coherence (77)). It is likely that the axonal alignment metric used to quantify  
534 CLARITY more closely reflects the ADC measure of DTI, given that ADC (or  
535 mean diffusivity) equally weights diffusion across all eigenvectors and does  
536 not bias the primary eigenvector as FA does. Thus, it is likely that alterations  
537 in the properties of axons in *Nrxn2a* KO mice are driving these changes in FA  
538 and ADC. Given we mostly see differences in RD, thought to reflect tract  
539 branching and myelination (as it measures  $\lambda_2$  and  $\lambda_3$ ), it is possible that the  
540 orientation in the perpendicular not parallel orientation of fibres is mostly  
541 affected. Given the differences in the amygdala, OFC and ACC, it is possible  
542 that even though neuronal densities are similar in the *Nrxn2a* KO brain, it is  
543 the connections between neurones and brain regions that are perturbed. This  
544 would be consistent with the idea that structural connectivity disruption may  
545 represent a core feature of autism (78). A broader question is how does the  
546 loss of *Nrxn2a* account for changes in axonal organisation? Ultimately, this  
547 question requires further studies. Others have shown that in *Nrxn2a* KO mice,  
548 excitatory transmitter release is reduced, as is short-term plasticity (18).  
549 Reduced glutamatergic release, even at a relatively long range to the  
550 synapse, can change the complexity of dendritic arbors (79). As this is a gene  
551 deletion model, it is conceivable that altered glutamatergic signalling during  
552 early development impairs appropriate synapse maturation, leading to the

Pervolaraki et al.

553 structural changes we see herein. Further, how or whether these structural  
554 changes fully explain the social impairments of *Nrxn2* $\alpha$  KO mice would require  
555 new studies. Conceivably, inducible knock-down of *Nrxn2* (by inducible  
556 knockout, siRNA, optogenetics etc.) within a specific brain region would  
557 provide evidence that social abnormalities are being driven by *Nrxn2* loss.  
558 However, developmentally-dependent altered structural connectivity would be  
559 harder to definitively manipulate to explain changes in social behaviours.

560

561 Here we have developed a new application of CLARITY to quantitatively  
562 investigate disease models by combining DTI with high resolution 3D imaging  
563 and automated analysis of axonal fibres in a within subject study. Inevitably,  
564 there are some technical limitations that will require future refinement as this  
565 technology matures.

566

567 First, while we used CLARITY and immunolabeling to identify axons, we  
568 cannot know whether axon-related changes alone reflect all the changes we  
569 observed for our DTI measures. Second, whilst we can segment entire brain  
570 regions for DTI analysis, it was not practical to image larger brain areas at the  
571 necessary resolution for CLARITY. While it is theoretically possible that we  
572 may bias sampling of each brain region by picking ROIs for multiphoton  
573 imaging, this was done using atlas-defined coordinates and by an  
574 experimenter blind to the DTI results, so minimising any bias. However, within  
575 the current study, we were only able to apply the CLARITY approach to the  
576 amygdala, OFC and ACC. It was not practical to apply this methodology to the  
577 hippocampus, due to its extremely heterogeneous structure. The small cubic



Pervolaraki et al.

578 ROIs could not be reproducibly positioned, and larger ROIs to average across  
579 larger areas of the hippocampus were not possible. Although imaging of fibre  
580 tracts in large volumes of cleared tissue is possible (80), fluorescent labelling  
581 limitations make it impractical for a study of this nature. Despite this, as the  
582 adoption of the CLARITY technique increases, we hope that the use of DTI  
583 and CLARITY to study structural connectivity across spatial scales will  
584 become commonplace.

585

586 As yet, no one DTI protocol has emerged as the standard for *in vivo* or *ex vivo*  
587 imaging. Indeed, there has been debate regarding the best number of  
588 diffusion gradients to use, among other parameters (81). Whilst some claim a  
589 minimum of 30 directions are required to estimate anisotropy (81), others  
590 claim that the benefits of using more than six are limited (82-85). A limitation  
591 of these studies is that these competing claims have not been complemented  
592 with standard neuroanatomical techniques. Where we found DTI differences,  
593 these were corroborated by the quantification of CLARITY (OFC, ACC, with  
594 BLA differences not reaching statistical significance after multiple-comparison  
595 correction). A further potential limitation of the current study is that groups of  
596 six animals may be underpowered. We argue for our approach here as  
597 follows. First, low variance in the datasets permits smaller group sizes.  
598 Second, for 18 of our 22 significant results, the observed power was more  
599 than 80%. Third, given the technical complexity of this approach, particularly  
600 in its early adoption and refinement stages, large sample throughput of  
601 multiple brain regions is challenging.

602

Pervolaraki et al.

603 In summary, our combined use of DTI and CLARITY has revealed changes in  
604 microstructure and structural connectivity of socially-relevant brain regions in  
605 *Nrxn2a* KO mice that may underlie their deficits in social behaviour. It is hard  
606 to conceive how these changes could have been observed using classical  
607 experimental approaches. We envisage this approach will deliver a new level  
608 of detail in structural connectivity approaches to understanding autism.

609

## 610 **Abbreviations**

611 ACC: anterior cingulate cortex

612 AD: axial diffusivity

613 ADC: apparent diffusion coefficient

614 ASD: autism spectrum disorder

615 BLA: basolateral amygdala

616 CLARITY: optically cleared brain tissue

617 DTI: diffusion tensor imaging

618 FA: fractional anisotropy

619 OFC: orbitofrontal cortex

620 *Nrxn2*: neurexin II

621 RD: radial diffusivity

622 ROI: region of interest

623

## 624 **Declarations**

### 625 **Ethics approval and consent to participate**

626 All experiments were performed under UK Home Office Project and Personal  
627 Licenses in accordance with the Animals (Scientific Procedures) Act 1986,

Pervolaraki et al.

628 and with the approval of the University of Leeds and Durham University  
629 Animal Ethical and Welfare Review Boards.

630

631 **Consent for publication**

632 Not applicable

633

634 **Availability of data and material**

635 The codes used to quantify the CLARITY datasets are made available by  
636 author LCA by email request to authors LCA or JD, subject to reference to the  
637 current paper. The datasets used and/or analysed during the current study  
638 are available from the corresponding author on reasonable request.

639

640 **Competing interests**

641 The authors declare no competing interests.

642

643 **Funding**

644 This work was supported by the Guy's and St. Thomas' Charity Prize PhD  
645 scholarship to ALT, a Medical Research Council (UK) grant (G0900625) to  
646 SJC and RJR, a University of Leeds Wellcome Trust ISSF (UK) Fellowship, a  
647 Royal Society (UK) grant (RG130316), an Alzheimer's Society Fellowship  
648 (AS-JF-15-008) to JD, a British Pharmacological Society (UK) grant to JD and  
649 CL, a BBSRC grant to LCA (BB/P000479/1) and a BBSRC grant to CL  
650 (BB/M008975/1). We acknowledge financial support from the Innovative  
651 Medicines Initiative Joint Undertaking under grant agreement no. 115300,  
652 resources of which are composed of financial contribution from the European

Pervolaraki et al.

653 Union's Seventh Framework Programme (FP7/2007–2013) and EFPIA  
654 companies' in kind contribution, the Mortimer D Sackler Foundation and the  
655 Sackler Institute for Translational Neurodevelopment (ALT and LCA). Some  
656 analysis scripts were provided to ALT at the Computational Image Analysis in  
657 Cellular and Developmental Biology course at the Marine Biological  
658 Laboratory (Woods Hole, MA, USA), funded by National Institutes of Health  
659 (R25 GM103792-01).

660

### 661 **Authors' contribution**

662 EP, ALT, LCA and JD conceived the study. EP and ALT performed the  
663 experiments. EP, ALT, LCA and JD analysed the data. SJC, RJR, LCA and  
664 JD funded the study. All authors contributed to writing the paper. All authors  
665 have read and approved the final manuscript.

666

### 667 **Acknowledgements**

668 Not applicable.

669

### 670 **References**

- 671 1. Sandin S, Lichtenstein P, Kuja-Halkola R, Larsson H, Hultman CM,  
672 Reichenberg A. The familial risk of autism. *Jama*. 2014;311(17):1770-7.
- 673 2. Cardno AG, Gottesman, II. Twin studies of schizophrenia: from bow-and-  
674 arrow concordances to star wars Mx and functional genomics. *American journal of*  
675 *medical genetics*. 2000;97(1):12-7.
- 676 3. Ronald A, Happe F, Bolton P, Butcher LM, Price TS, Wheelwright S, et al.  
677 Genetic heterogeneity between the three components of the autism spectrum: a twin  
678 study. *Journal of the American Academy of Child and Adolescent Psychiatry*.  
679 2006;45(6):691-9.
- 680 4. Ronemus M, Iossifov I, Levy D, Wigler M. The role of de novo mutations in  
681 the genetics of autism spectrum disorders. *Nature reviews Genetics*. 2014;15(2):133-  
682 41.
- 683 5. Geschwind DH, State MW. Gene hunting in autism spectrum disorder: on the  
684 path to precision medicine. *The Lancet Neurology*. 2015;14(11):1109-20.

- 685 6. Sahin M, Sur M. Genes, circuits, and precision therapies for autism and  
686 related neurodevelopmental disorders. *Science*. 2015;350(6263).
- 687 7. Lise MF, El-Husseini A. The neuroligin and neuroligin families: from structure  
688 to function at the synapse. *Cellular and molecular life sciences : CMLS*.  
689 2006;63(16):1833-49.
- 690 8. Sudhof TC. Synaptic Neurexin Complexes: A Molecular Code for the Logic  
691 of Neural Circuits. *Cell*. 2017;171(4):745-69.
- 692 9. Gauthier J, Siddiqui TJ, Huashan P, Yokomaku D, Hamdan FF, Champagne  
693 N, et al. Truncating mutations in NRXN2 and NRXN1 in autism spectrum disorders  
694 and schizophrenia. *Human genetics*. 2011;130(4):563-73.
- 695 10. Mohrmann I, Gillessen-Kaesbach G, Siebert R, Caliebe A, Hellenbroich Y. A  
696 de novo 0.57 Mb microdeletion in chromosome 11q13.1 in a patient with speech  
697 problems, autistic traits, dysmorphic features and multiple endocrine neoplasia type 1.  
698 *European journal of medical genetics*. 2011;54(4):e461-4.
- 699 11. Boyle MI, Jespersgaard C, Nazaryan L, Ravn K, Brondum-Nielsen K,  
700 Bisgaard AM, et al. Deletion of 11q12.3-11q13.1 in a patient with intellectual  
701 disability and childhood facial features resembling Cornelia de Lange syndrome.  
702 *Gene*. 2015;572(1):130-4.
- 703 12. Li J, Wang L, Gou H, Shi L, Zhang K, Tang M, et al. Targeted sequencing and  
704 functional analysis reveal brain-size-related genes and their networks in autism  
705 spectrum disorders. *Molecular Psychiatry*. 2017;22:1282-90.
- 706 13. Yuan H, Li X, Wang Q, Yang W, Song J, Hu X, et al. A de novo 921Kb  
707 microdeletion at 11q13.1 including neuroligin 2 in a boy with developmental delay,  
708 deficits in speech and language without autistic behaviors. *European journal of  
709 medical genetics*. 2018.
- 710 14. Williams SM, An JY, Edson J, Watts M, Murigneux V, Whitehouse AJO, et  
711 al. An integrative analysis of non-coding regulatory DNA variations associated with  
712 autism spectrum disorder. *Molecular psychiatry*. 2018.
- 713 15. Wang J, Gong J, Li L, Chen Y, Liu L, Gu H, et al. Neuroligin gene family  
714 variants as risk factors for autism spectrum disorder. *Autism research : official journal  
715 of the International Society for Autism Research*. 2018;11(1):37-43.
- 716 16. Duda M, Zhang H, Li HD, Wall DP, Burmeister M, Guan Y. Brain-specific  
717 functional relationship networks inform autism spectrum disorder gene prediction.  
718 *Translational psychiatry*. 2018;8(1):56.
- 719 17. Dachtler J, Gasper J, Cohen RN, Ivorra JL, Swiffen DJ, Jackson AJ, et al.  
720 Deletion of alpha-neurexin II results in autism-related behaviors in mice.  
721 *Translational psychiatry*. 2014;4:e484.
- 722 18. Born G, Grayton HM, Langhorst H, Dudanova I, Rohlmann A, Woodward  
723 BW, et al. Genetic targeting of NRXN2 in mice unveils role in excitatory cortical  
724 synapse function and social behaviors. *Frontiers in synaptic neuroscience*. 2015;7:3.
- 725 19. Dachtler J, Ivorra JL, Rowland TE, Lever C, Rodgers RJ, Clapcote SJ.  
726 Heterozygous deletion of alpha-neurexin I or alpha-neurexin II results in behaviors  
727 relevant to autism and schizophrenia. *Behavioral neuroscience*. 2015;129(6):765-76.
- 728 20. Dudanova I, Tabuchi K, Rohlmann A, Sudhof TC, Missler M. Deletion of  
729 alpha-neurexins does not cause a major impairment of axonal pathfinding or synapse  
730 formation. *The Journal of comparative neurology*. 2007;502(2):261-74.
- 731 21. Beaulieu C. The basis of anisotropic water diffusion in the nervous system - a  
732 technical review. *NMR in biomedicine*. 2002;15(7-8):435-55.

Pervolaraki et al.

- 733 22. Barnea-Goraly N, Kwon H, Menon V, Eliez S, Lotspeich L, Reiss AL. White  
734 matter structure in autism: preliminary evidence from diffusion tensor imaging.  
735 *Biological psychiatry*. 2004;55(3):323-6.
- 736 23. Noriuchi M, Kikuchi Y, Yoshiura T, Kira R, Shigeto H, Hara T, et al. Altered  
737 white matter fractional anisotropy and social impairment in children with autism  
738 spectrum disorder. *Brain research*. 2010;1362:141-9.
- 739 24. Belmonte MK, Allen G, Beckel-Mitchener A, Boulanger LM, Carper RA,  
740 Webb SJ. Autism and abnormal development of brain connectivity. *The Journal of  
741 neuroscience : the official journal of the Society for Neuroscience*. 2004;24(42):9228-  
742 31.
- 743 25. Chung K, Wallace J, Kim SY, Kalyanasundaram S, Andalman AS, Davidson  
744 TJ, et al. Structural and molecular interrogation of intact biological systems. *Nature*.  
745 2013;497(7449):332-7.
- 746 26. Pervolaraki E, Anderson RA, Benson AP, Hayes-Gill B, Holden AV, Moore  
747 BJ, et al. Antenatal architecture and activity of the human heart. *Interface focus*.  
748 2013;3(2):20120065.
- 749 27. Paxinos G, Franklin K. *The Mouse Brain in Stereotaxic Coordinates*. Third ed:  
750 Academic Press; 2008.
- 751 28. Pervolaraki E, Dachtler J, Anderson RA, Holden AV. Ventricular myocardium  
752 development and the role of connexins in the human fetal heart. *Scientific reports*.  
753 2017;7(1):12272.
- 754 29. Yeh FC, Verstynen TD, Wang Y, Fernandez-Miranda JC, Tseng WY.  
755 Deterministic diffusion fiber tracking improved by quantitative anisotropy. *PloS one*.  
756 2013;8(11):e80713.
- 757 30. Basser PJ, Mattiello J, LeBihan D. Estimation of the effective self-diffusion  
758 tensor from the NMR spin echo. *Journal of magnetic resonance Series B*.  
759 1994;103(3):247-54.
- 760 31. Jiang H, van Zijl PC, Kim J, Pearlson GD, Mori S. DtiStudio: resource  
761 program for diffusion tensor computation and fiber bundle tracking. *Computer  
762 methods and programs in biomedicine*. 2006;81(2):106-16.
- 763 32. Ferguson JN, Aldag JM, Insel TR, Young LJ. Oxytocin in the medial  
764 amygdala is essential for social recognition in the mouse. *The Journal of neuroscience  
765 : the official journal of the Society for Neuroscience*. 2001;21(20):8278-85.
- 766 33. Tanimizu T, Kenney JW, Okano E, Kadoma K, Frankland PW, Kida S.  
767 Functional Connectivity of Multiple Brain Regions Required for the Consolidation of  
768 Social Recognition Memory. *The Journal of neuroscience : the official journal of the  
769 Society for Neuroscience*. 2017;37(15):4103-16.
- 770 34. Emery NJ, Capitanio JP, Mason WA, Machado CJ, Mendoza SP, Amaral DG.  
771 The effects of bilateral lesions of the amygdala on dyadic social interactions in rhesus  
772 monkeys (*Macaca mulatta*). *Behavioral neuroscience*. 2001;115(3):515-44.
- 773 35. Rosvold HE, Mirsky AF, Pribram KH. Influence of amygdectomy on social  
774 behavior in monkeys. *Journal of comparative and physiological psychology*.  
775 1954;47(3):173-8.
- 776 36. Mosher CP, Zimmerman PE, Gothard KM. Neurons in the monkey amygdala  
777 detect eye contact during naturalistic social interactions. *Current biology : CB*.  
778 2014;24(20):2459-64.
- 779 37. Rutishauser U, Mamelak AN, Adolphs R. The primate amygdala in social  
780 perception - insights from electrophysiological recordings and stimulation. *Trends in  
781 neurosciences*. 2015;38(5):295-306.

- 782 38. Rutishauser U, Tudusciuc O, Wang S, Mamelak AN, Ross IB, Adolphs R.  
783 Single-neuron correlates of atypical face processing in autism. *Neuron*.  
784 2013;80(4):887-99.
- 785 39. Adolphs R, Tranel D, Damasio AR. The human amygdala in social judgment.  
786 *Nature*. 1998;393(6684):470-4.
- 787 40. Baron-Cohen S, Ring HA, Bullmore ET, Wheelwright S, Ashwin C, Williams  
788 SC. The amygdala theory of autism. *Neuroscience and biobehavioral reviews*.  
789 2000;24(3):355-64.
- 790 41. Maaswinkel H, Baars AM, Gispen WH, Spruijt BM. Roles of the basolateral  
791 amygdala and hippocampus in social recognition in rats. *Physiology & behavior*.  
792 1996;60(1):55-63.
- 793 42. Kogan JH, Frankland PW, Silva AJ. Long-term memory underlying  
794 hippocampus-dependent social recognition in mice. *Hippocampus*. 2000;10(1):47-56.
- 795 43. Okuyama T, Kitamura T, Roy DS, Itohara S, Tonegawa S. Ventral CA1  
796 neurons store social memory. *Science*. 2016;353(6307):1536-41.
- 797 44. van der Kooij MA, Fantin M, Kraev I, Korshunova I, Grosse J, Zanoletti O, et  
798 al. Impaired hippocampal neurotrophin-2 function by chronic stress or synthetic peptide  
799 treatment is linked to social deficits and increased aggression.  
800 *Neuropsychopharmacology : official publication of the American College of*  
801 *Neuropsychopharmacology*. 2014;39(5):1148-58.
- 802 45. Rubin RD, Watson PD, Duff MC, Cohen NJ. The role of the hippocampus in  
803 flexible cognition and social behavior. *Frontiers in human neuroscience*. 2014;8:742.
- 804 46. Nicolson R, DeVito TJ, Vidal CN, Sui Y, Hayashi KM, Drost DJ, et al.  
805 Detection and mapping of hippocampal abnormalities in autism. *Psychiatry research*.  
806 2006;148(1):11-21.
- 807 47. Schumann CM, Hamstra J, Goodlin-Jones BL, Lotspeich LJ, Kwon H,  
808 Buonocore MH, et al. The amygdala is enlarged in children but not adolescents with  
809 autism; the hippocampus is enlarged at all ages. *The Journal of neuroscience : the*  
810 *official journal of the Society for Neuroscience*. 2004;24(28):6392-401.
- 811 48. Bachevalier J, Loveland KA. The orbitofrontal-amygdala circuit and self-  
812 regulation of social-emotional behavior in autism. *Neuroscience and biobehavioral*  
813 *reviews*. 2006;30(1):97-117.
- 814 49. Beer JS, John OP, Scabini D, Knight RT. Orbitofrontal cortex and social  
815 behavior: integrating self-monitoring and emotion-cognition interactions. *Journal of*  
816 *cognitive neuroscience*. 2006;18(6):871-9.
- 817 50. Watson KK, Platt ML. Social signals in primate orbitofrontal cortex. *Current*  
818 *biology : CB*. 2012;22(23):2268-73.
- 819 51. Girgis RR, Minshew NJ, Melhem NM, Nutche JJ, Keshavan MS, Hardan AY.  
820 Volumetric alterations of the orbitofrontal cortex in autism. *Progress in neuro-*  
821 *psychopharmacology & biological psychiatry*. 2007;31(1):41-5.
- 822 52. Tyson AL, Hilton ST, Andraea LC. Rapid, simple and inexpensive production  
823 of custom 3D printed equipment for large-volume fluorescence microscopy.  
824 *International journal of pharmaceutics*. 2015;494(2):651-6.
- 825 53. Herbert MR, Ziegler DA, Deutsch CK, O'Brien LM, Kennedy DN, Filipek  
826 PA, et al. Brain asymmetries in autism and developmental language disorder: a nested  
827 whole-brain analysis. *Brain : a journal of neurology*. 2005;128(Pt 1):213-26.
- 828 54. Alexander AL, Lee JE, Lazar M, Field AS. Diffusion tensor imaging of the  
829 brain. *Neurotherapeutics : the journal of the American Society for Experimental*  
830 *NeuroTherapeutics*. 2007;4(3):316-29.

Pervolaraki et al.

- 831 55. Alexander AL, Lee JE, Lazar M, Boudos R, DuBray MB, Oakes TR, et al.  
832 Diffusion tensor imaging of the corpus callosum in Autism. *NeuroImage*.  
833 2007;34(1):61-73.
- 834 56. Travers BG, Tromp do PM, Adluru N, Lange N, Destiche D, Ennis C, et al.  
835 Atypical development of white matter microstructure of the corpus callosum in males  
836 with autism: a longitudinal investigation. *Molecular autism*. 2015;6:15.
- 837 57. Ellegood J, Babineau BA, Henkelman RM, Lerch JP, Crawley JN.  
838 Neuroanatomical analysis of the BTBR mouse model of autism using magnetic  
839 resonance imaging and diffusion tensor imaging. *NeuroImage*. 2013;70:288-300.
- 840 58. Kumar M, Kim S, Pickup S, Chen R, Fairless AH, Ittyerah R, et al.  
841 Longitudinal in-vivo diffusion tensor imaging for assessing brain developmental  
842 changes in BALB/cJ mice, a model of reduced sociability relevant to autism. *Brain*  
843 *research*. 2012;1455:56-67.
- 844 59. Pitkanen A, Pikkarainen M, Nurminen N, Ylinen A. Reciprocal connections  
845 between the amygdala and the hippocampal formation, perirhinal cortex, and  
846 postrhinal cortex in rat. A review. *Annals of the New York Academy of Sciences*.  
847 2000;911:369-91.
- 848 60. Cavada C, Company T, Tejedor J, Cruz-Rizzolo RJ, Reinoso-Suarez F. The  
849 anatomical connections of the macaque monkey orbitofrontal cortex. A review.  
850 *Cerebral cortex*. 2000;10(3):220-42.
- 851 61. Abrams DA, Lynch CJ, Cheng KM, Phillips J, Supekar K, Ryali S, et al.  
852 Underconnectivity between voice-selective cortex and reward circuitry in children  
853 with autism. *Proceedings of the National Academy of Sciences of the United States of*  
854 *America*. 2013;110(29):12060-5.
- 855 62. Murphy ER, Foss-Feig J, Kenworthy L, Gaillard WD, Vaidya CJ. Atypical  
856 Functional Connectivity of the Amygdala in Childhood Autism Spectrum Disorders  
857 during Spontaneous Attention to Eye-Gaze. *Autism research and treatment*.  
858 2012;2012:652408.
- 859 63. Sundaram SK, Kumar A, Makki MI, Behen ME, Chugani HT, Chugani DC.  
860 Diffusion tensor imaging of frontal lobe in autism spectrum disorder. *Cerebral cortex*.  
861 2008;18(11):2659-65.
- 862 64. Fellgiebel A, Wille P, Muller MJ, Winterer G, Scheurich A, Vucurevic G, et  
863 al. Ultrastructural hippocampal and white matter alterations in mild cognitive  
864 impairment: a diffusion tensor imaging study. *Dementia and geriatric cognitive*  
865 *disorders*. 2004;18(1):101-8.
- 866 65. Stebbins GT, Murphy CM. Diffusion tensor imaging in Alzheimer's disease  
867 and mild cognitive impairment. *Behavioural neurology*. 2009;21(1):39-49.
- 868 66. Carlesimo GA, Cherubini A, Caltagirone C, Spalletta G. Hippocampal mean  
869 diffusivity and memory in healthy elderly individuals: a cross-sectional study.  
870 *Neurology*. 2010;74(3):194-200.
- 871 67. Ameis SH, Fan J, Rockel C, Voineskos AN, Lobaugh NJ, Soorya L, et al.  
872 Impaired structural connectivity of socio-emotional circuits in autism spectrum  
873 disorders: a diffusion tensor imaging study. *PloS one*. 2011;6(11):e28044.
- 874 68. Shukla DK, Keehn B, Muller RA. Tract-specific analyses of diffusion tensor  
875 imaging show widespread white matter compromise in autism spectrum disorder.  
876 *Journal of child psychology and psychiatry, and allied disciplines*. 2011;52(3):286-95.
- 877 69. Jou RJ, Jackowski AP, Papademetris X, Rajeevan N, Staib LH, Volkmar FR.  
878 Diffusion tensor imaging in autism spectrum disorders: preliminary evidence of  
879 abnormal neural connectivity. *The Australian and New Zealand journal of psychiatry*.  
880 2011;45(2):153-62.



- 881 70. Conturo TE, Williams DL, Smith CD, Gultepe E, Akbudak E, Minshew NJ.  
882 Neuronal fiber pathway abnormalities in autism: an initial MRI diffusion tensor  
883 tracking study of hippocampo-fusiform and amygdalo-fusiform pathways. *Journal of*  
884 *the International Neuropsychological Society : JINS*. 2008;14(6):933-46.
- 885 71. Stanfield AC, McIntosh AM, Spencer MD, Philip R, Gaur S, Lawrie SM.  
886 Towards a neuroanatomy of autism: a systematic review and meta-analysis of  
887 structural magnetic resonance imaging studies. *European psychiatry : the journal of*  
888 *the Association of European Psychiatrists*. 2008;23(4):289-99.
- 889 72. Vissers ME, Cohen MX, Geurts HM. Brain connectivity and high functioning  
890 autism: a promising path of research that needs refined models, methodological  
891 convergence, and stronger behavioral links. *Neuroscience and biobehavioral reviews*.  
892 2012;36(1):604-25.
- 893 73. Rudie JD, Brown JA, Beck-Pancer D, Hernandez LM, Dennis EL, Thompson  
894 PM, et al. Altered functional and structural brain network organization in autism.  
895 *NeuroImage Clinical*. 2012;2:79-94.
- 896 74. Uddin LQ, Supekar K, Menon V. Reconceptualizing functional brain  
897 connectivity in autism from a developmental perspective. *Frontiers in human*  
898 *neuroscience*. 2013;7:458.
- 899 75. Zhan Y, Paolicelli RC, Sforazzini F, Weinhard L, Bolasco G, Pagani F, et al.  
900 Deficient neuron-microglia signaling results in impaired functional brain connectivity  
901 and social behavior. *Nature neuroscience*. 2014;17(3):400-6.
- 902 76. Missler M, Zhang W, Rohlmann A, Kattenstroth G, Hammer RE, Gottmann  
903 K, et al. Alpha-neurexins couple Ca<sup>2+</sup> channels to synaptic vesicle exocytosis.  
904 *Nature*. 2003;423(6943):939-48.
- 905 77. Alba-Ferrara LM, de Erausquin GA. What does anisotropy measure? Insights  
906 from increased and decreased anisotropy in selective fiber tracts in schizophrenia.  
907 *Frontiers in integrative neuroscience*. 2013;7:9.
- 908 78. Minshew NJ, Williams DL. The new neurobiology of autism: cortex,  
909 connectivity, and neuronal organization. *Archives of neurology*. 2007;64(7):945-50.
- 910 79. Andrae LC, Burrone J. Spontaneous Neurotransmitter Release Shapes  
911 Dendritic Arbors via Long-Range Activation of NMDA Receptors. *Cell reports*. 2015.
- 912 80. Ye L, Allen WE, Thompson KR, Tian Q, Hsueh B, Ramakrishnan C, et al.  
913 Wiring and Molecular Features of Prefrontal Ensembles Representing Distinct  
914 Experiences. *Cell*. 2016;165(7):1776-88.
- 915 81. Jones DK. The effect of gradient sampling schemes on measures derived from  
916 diffusion tensor MRI: a Monte Carlo study. *Magnetic resonance in medicine*.  
917 2004;51(4):807-15.
- 918 82. Lebel C, Benner T, Beaulieu C. Six is enough? Comparison of diffusion  
919 parameters measured using six or more diffusion-encoding gradient directions with  
920 deterministic tractography. *Magnetic resonance in medicine*. 2012;68(2):474-83.
- 921 83. Hasan KM, Parker DL, Alexander AL. Comparison of gradient encoding  
922 schemes for diffusion-tensor MRI. *Journal of magnetic resonance imaging : JMRI*.  
923 2001;13(5):769-80.
- 924 84. Yao X, Yu T, Liang B, Xia T, Huang Q, Zhuang S. Effect of increasing  
925 diffusion gradient direction number on diffusion tensor imaging fiber tracking in the  
926 human brain. *Korean journal of radiology*. 2015;16(2):410-8.
- 927 85. Ni H, Kavcic V, Zhu T, Ekholm S, Zhong J. Effects of number of diffusion  
928 gradient directions on derived diffusion tensor imaging indices in human brain. *AJNR*  
929 *American journal of neuroradiology*. 2006;27(8):1776-81.
- 930

Pervolaraki et al.

931 **Figure Legends**

932 **Figure 1**

933 Quantification of CLARITY imaging. **A** Sections of DTI-scanned brain were  
934 segmented at different Bregma levels for (i) the orbitofrontal cortex, (ii) the  
935 anterior hippocampus and amygdala, (iii) the mid hippocampus and posterior  
936 amygdala and (iv) the posterior hippocampus. **B-D** DTI-scanned brains were  
937 computed for tracts. Tissue from wild-type and *Nrxn2α* KO mice were cleared  
938 and stained for neurofilament and DAPI (**E**). **F** Automated MATLAB scripts  
939 were used to segment the DAPI (blue) and neurofilament (purple) channels  
940 such that cell density and axonal density and orientation could be calculated.  
941 **G** is representative of a CLARITY-derived 3D stacked image of a DAPI and  
942 neurofilament of a region of interest, with **H** being the corresponding  
943 segmented image. Scale bar: 100 μm.

944

945 **Figure 2**

946 Deletion of *Nrxn2α* reduces amygdala fractional anisotropy (FA) but not  
947 apparent diffusion coefficient (ADC). DTI images of the amygdala was  
948 segmented at two regions; anterior (Bregma -1.94 mm) and posterior (Bregma  
949 -2.46 mm). FA of the whole amygdala structure was significantly reduced in  
950 the posterior (**B**) but not (**A**) region. FA was also significantly reduced in the  
951 anterior basolateral amygdala (BLA) (**C**). However, ADC was similar between  
952 the genotypes in the anterior (**D**), posterior (**E**) and BLA (**F**). \*\*= $P < 0.01$ ,  
953 \*= $P < 0.05$ . Error bars represent s.e.m. Wild-type n=6, *Nrxn2α* KO n=6.

954

955 **Figure 3**

Pervolaraki et al.

956 *Nrxn2α* KO mice have increased apparent diffusion coefficient (ADC) and  
957 axial (AD) and radial diffusivity (RD) in the orbitofrontal cortex (OFC) and the  
958 anterior cingulate cortex (ACC). Although reduced, there was no significant  
959 difference between wild-types and *Nrxn2α* KO mice for FA in the OFC (**A**) and  
960 ACC (**C**), but ADC was significantly increased in *Nrxn2α* KO mice in both  
961 prefrontal regions (**B** and **D**). The OFC has significantly increased AD and RD  
962 (**E-F**), whereas only RD was increased in the ACC (**G-H**). \*\*\*=P=0.0005,  
963 \*\*\*=P<0.001, \*\*=P<0.01, \*=P<0.05. Error bars represent s.e.m. Wild-type n=6,  
964 *Nrxn2α* KO n=6.

965

#### 966 **Figure 4**

967 Tractographic analysis of amygdala-hippocampus and amygdala-orbitofrontal  
968 cortex (OFC) connectivity. Amygdala-hippocampal connections are  
969 characterised by greater right hemisphere axial diffusivity (AD) *Nrxn2α* KO  
970 mice (**A**) but not radial diffusivity (RD) (**B**). Specific to the BLA, connections to  
971 the anterior hippocampus (**C**) and posterior hippocampus (**D**) have greater  
972 right hemisphere AD. Although the amygdala-OFC connection was similar  
973 between the genotypes for AD (**E**), *Nrxn2α* KO mice had significantly  
974 increased RD (**F**). \*=P<0.05, \*\*\*=P<0.001. Error bars represent s.e.m. Wild-  
975 type n=6, *Nrxn2α* KO n=6.

976

#### 977 **Figure 5**

978 CLARITY reveals differences in axonal alignment and fibre density in *Nrxn2α*  
979 KO mice. (**A-C**) Representative images of the CLARITY-treated brain, with  
980 ROI defined for the anterior cingulate cortex (ACC), orbitofrontal cortex

Pervolaraki et al.

981 (OFC), basomedial amygdala (BMA) and basolateral amygdala (BLA). For the  
982 ACC, the axonal alignment (**D**) and axon density (**E**) were significantly altered  
983 in KO mice, but cell density was unaltered (**F**). Within the medial OFC, only  
984 axonal alignment was significantly altered in KOs (**G**), with axon density (**H**)  
985 and cell density (**I**) being similar. For the BMA, both the axonal alignment (**J**)  
986 and axon density (**K**) were significantly increased, whilst cell density was  
987 unaltered (**L**). \*=P<0.05, \*\*=P<0.01. Error bars represent s.e.m. Wild-type  
988 n=6, *Nrxn2α* KO n=6.  
989

**The within-subject application of diffusion tensor MRI and CLARITY  
reveals brain structural changes in *Nrxn2* deletion mice**

**Supplemental Material**

Eleftheria Pervolaraki Ph.D, Adam L. Tyson MRes, Francesca Pibiri Ph.D, Steven L. Poulter Ph.D, Amy C. Reichelt Ph.D, R. John Rodgers Ph.D, Steven J. Clapcote Ph.D, Colin Lever Ph.D, Laura C. Andreae M.D. Ph.D, James Dachtler Ph.D

## **Supplemental Materials and Methods**

### **Diffusion Tensor MRI**

#### **Data Acquisition**

Brain MR imaging was performed on a vertical 9.4 Tesla spectrometer (Bruker AVANCE II NMR, Ettlingen, Germany) with an 89 mm wide bore, 3 radio frequency channels with digital broadband frequency synthesis (6-620 MHz) and an imaging coil with diameter of 25 mm for hydrogen ( $^1\text{H}$ ). 3D images for each brain were obtained using a DT-MRI protocol (TE: 35 ms, TR: 700 ms, 10 signal averages). The field of view was set at 128 x 128 x 128, with a cubic resolution of 100  $\mu\text{m}/\text{pixel}$  and a b value of 1200  $\text{s}/\text{mm}^2$ . For each brain, diffusion weighted images were obtained in 6 directions, based upon recent published protocols (1-5). The subject of the number of diffusions gradients has been debated (6), with studies suggesting limited benefits of using more than 6 directions in biological tissue (7-9). The imaging time for each brain was 60 hours.

### **CLARITY**

#### **Solutions:**

**Hydrogel solution:** 2% PFA 2% acrylamide 0.05% bis-acrylamide and 0.25% VA-044 thermal initiator (2,2'-Azobis[2-(2-imidazolyl) propane] dihydrochloride) in PBS, pH 7.4.

**Clearing buffer:** 8% Sodium dodecyl sulfate in 200mM boric acid, pH 8.5.

#### **Multiphoton imaging – methodological outline**

Cleared samples were mounted in custom 3D printed chambers for two-photon imaging. Images were acquired using ZEN Black (Zeiss, Germany). DAPI signal was detected using a 485 nm short pass filter, and neurofilament using a 500-550 nm band pass filter. The power of the excitation laser was varied to maximise the dynamic range for each image, but all other parameters were kept constant. The images were analysed using custom MATLAB (version 9.1, The Mathworks Inc.) scripts. Two-dimensional images were visualised using ImageJ (10) and three-dimensional images using Vaa3D (11).

#### **Multiphoton imaging and analysis – image analysis method**

##### **Pre-processing**

Image files were loaded into MATLAB (The Mathworks Ltd.) using the BioFormats toolbox (12), and the raw image data were obtained along with the precise voxel dimensions from the metadata. Each two-dimensional (2D) image from the three-dimensional (3D) stack was initially corrected for uneven background illumination by element-wise division by a 2D reference image. This reference image was calculated as the mean 2D image through the 3D stack, which was smoothed using a 2D Gaussian kernel with a full-width at half maximum (FWHM) of 20 % of the geometric mean of the dimensions of the 2D image (mean dimension). The image was denoised by filtering the image with a Gaussian kernel with a standard deviation of one pixel. Background subtraction was carried out by subtracting a smoothed, filtered image (FWHM 10 % of the mean dimension). Each pixel was then smoothed using a 3D Gaussian kernel with FWHM of 1.5  $\mu\text{m}$  (the largest axonal diameter expected according to Perge et al. (13)).

### **Segmentation**

The numerical gradient of the image in each dimension ( $\Delta X, \Delta Y, \Delta Z$ ) was calculated, and these were combined to calculate the magnitude of the gradient ( $\sqrt{\Delta X^2 + \Delta Y^2 + \Delta Z^2}$ ). The resulting image was thresholded, using a combination of the Otsu (1979) and Rosin (2001) methods (Rosin threshold + 2/5 Otsu threshold) (14, 15). The gradient image highlights the edge of each axon; to combine these into a single object, the image was dilated and then eroded with a cubic structuring element (each side being 1.5  $\mu\text{m}$ , to 'close' the largest axons as per Perge et al. (13)). Very small objects (less than 50  $\mu\text{m}^3$ ) were removed from the image as they reflected noise, very small neuronal processes and gradients around cells.

Owing to variations in staining intensity of different axons, the thresholding produced segmented axons of various thicknesses that did not necessarily reflect the true structure. To remove this bias, the thresholded image was skeletonised using a homotopic thinning algorithm (16) implemented in MATLAB(17). The resulting image was dilated and then eroded using a cubic structuring element (10 pixels on each side for dilation, 9 for erosion) to produce connected processes with a uniform two-pixel diameter. This dilation ensured that the voxels in the binary image were connected via their faces (6-connected) rather than just their corners (26-connected), which better reflects the true structure of biological processes. This method detects

most large axons at the expense of smaller processes, and the loss of any information about axon diameter. These steps are outlined in Supp. Figure 2.

### **Analysis**

The density of axons was calculated as the fraction of the image volume taken up by the segmented axons. A measure of axonal alignment was calculated by determining the mean axonal alignment along each dimension. This alignment was calculated by moving along the 3D image in a single dimension, keeping the coordinates in the other dimensions constant, and counting the number of times the pixel intensity did not change (i.e. how many times an axon was not entered or left). This number was averaged across each face of the image volume and scaled to the length of each dimension to produce a metric of how constant the image intensity is in that dimension. The perfect case of no intensity change (i.e. all axons are aligned perfectly with a particular dimension) gives a value of 1. The greater the difference between this measure in each three dimensions, the more aligned the axons must be (i.e. their directions are anisotropic). The standard deviation of this measure across the three dimensions was calculated as the axonal alignment.

The alignment calculation is illustrated in Supp. Figure 3 for a simple, two-dimensional case. Supp. Figure 3a shows the case of low axonal alignment, and Supp. Figure 3b shows the case of high axonal alignment. In each case, for illustration, each pixel represented by a small square on the grid is classed as either containing an axon or not. In the real images, the pixels are smaller, and are actually binary. In each axis, the number of pixel transitions in which the presence of an axon does not change is divided by the number of transitions, and the average is calculated. The standard deviation of this average for all axes is the measure of axonal alignment. When the alignment is low, the two averages are similar, and the standard deviation is low. When the alignment is high the two averages are very different, and the standard deviation is high. To analyse the real data, this same calculation is carried out in 3D, but in a much larger grid of voxels. Cell density was calculated as the number of cells per mm<sup>3</sup>.



**Supp. Table 1**

| <b>Brain Region</b>   | <b>DTI Measure</b> | <b>ANOVA Comparison</b> | <b>F Value</b>                         | <b>P Value</b>                |
|-----------------------|--------------------|-------------------------|----------------------------------------|-------------------------------|
| Anterior Hippocampus  | FA                 | Genotype                | $F_{(1,10)} = 3.91$                    | $P = 0.063$                   |
|                       |                    | Hemisphere              | $F_{(1,10)} = 3.89$                    | $P = 0.065$                   |
| Mid Hippocampus       | FA                 | Genotype                | $F_{(1,10)} = 3.12$                    | $P = 0.07$                    |
|                       |                    | Hemisphere              | $F_{(1,10)} < 1$                       | $P = 0.146$                   |
| Posterior Hippocampus | FA                 | Genotype                | $F_{(1,10)} = 1.99$                    | $P = 0.104$                   |
|                       |                    | Hemisphere              | $F_{(1,10)} = 1.95$                    | $P = 0.101$                   |
| Anterior Hippocampus  | ADC                | Genotype                | $F_{(1,10)} = 3.17$                    | $P = 0.073$                   |
|                       |                    | Hemisphere              | $F_{(1,10)} = 2.20$                    | $P = 0.095$                   |
| Mid Hippocampus       | ADC                | Genotype                | $F_{(1,10)} < 1$                       | $P = 0.160$                   |
|                       |                    | Hemisphere              | $F_{(1,10)} = 1.62$                    | $P = 0.115$                   |
| Posterior Hippocampus | ADC                | <b>Genotype</b>         | <b><math>F_{(1,10)} = 8.88</math></b>  | <b><math>P = 0.036</math></b> |
|                       |                    | Hemisphere              | $F_{(1,10)} < 1$                       | $P = 0.180$                   |
| Anterior Hippocampus  | AD                 | Genotype                | $F_{(1,10)} < 1$                       | $P = 0.187$                   |
|                       |                    | Hemisphere              | $F_{(1,10)} = 1.07$                    | $P = 0.121$                   |
| Mid Hippocampus       | AD                 | Genotype                | $F_{(1,10)} < 1$                       | $P = 0.153$                   |
|                       |                    | Hemisphere              | $F_{(1,10)} = 1.04$                    | $P = 0.124$                   |
| Posterior Hippocampus | AD                 | Genotype                | $F_{(1,10)} = 3.45$                    | $P = 0.07$                    |
|                       |                    | <b>Hemisphere</b>       | <b><math>F_{(1,10)} = 6.19</math></b>  | $P = 0.052$                   |
| Anterior Hippocampus  | RD                 | Genotype                | $F_{(1,10)} = 3.03$                    | $P = 0.086$                   |
|                       |                    | Hemisphere              | $F_{(1,10)} < 1$                       | $P = 0.137$                   |
| Mid Hippocampus       | RD                 | Genotype                | $F_{(1,10)} < 1$                       | $P = 0.140$                   |
|                       |                    | Hemisphere              | $F_{(1,10)} = 1.33$                    | $P = 0.119$                   |
| Posterior Hippocampus | RD                 | <b>Genotype</b>         | <b><math>F_{(1,10)} = 10.83</math></b> | <b><math>P = 0.027</math></b> |
|                       |                    | Hemisphere              | $F_{(1,10)} = 3.48$                    | $P = 0.07$                    |

Statistical analysis of the anterior (Bregma -1.94 mm), mid (Bregma -2.46 mm) and posterior (Bregma -3.28 mm) hippocampus for fractional anisotropy (FA), apparent diffusion coefficient (ADC), axial diffusion (AD) and radial diffusion (RD). Analysis was performed using repeated measure two-way ANOVAs for genotype and hemisphere (Benjamini-Hochberg corrected (corrected P values stated)).

**Supp. Table 2**

| <b>Brain Region</b>            | <b>DTI Measure</b> | <b>ANOVA Comparison</b>      | <b>F Value</b>                         | <b>P Value</b>   |
|--------------------------------|--------------------|------------------------------|----------------------------------------|------------------|
| Amygdala-Anterior Hippocampus  | AD                 | Genotype                     | $F_{(1,10)} < 1$                       | P = 0.164        |
|                                |                    | Hemisphere                   | $F_{(1,10)} = 2.10$                    | P = 0.097        |
|                                |                    | <b>Genotype x Hemisphere</b> | <b><math>F_{(1,10)} = 12.12</math></b> | <b>P = 0.023</b> |
| Amygdala-Anterior Hippocampus  | RD                 | Genotype                     | $F_{(1,10)} < 1$                       | P = 0.149        |
|                                |                    | Hemisphere                   | $F_{(1,10)} = 1.32$                    | P = 0.106        |
|                                |                    | Genotype x Hemisphere        | $F_{(1,10)} < 1$                       | P = 0.155        |
| Amygdala-Posterior Hippocampus | AD                 | Genotype                     | $F_{(1,10)} < 1$                       | P = 0.142        |
|                                |                    | Hemisphere                   | $F_{(1,10)} < 1$                       | P = 0.189        |
|                                |                    | Genotype x Hemisphere        | $F_{(1,10)} = 4.54$                    | P = 0.061        |
| Amygdala-Posterior Hippocampus | RD                 | Genotype                     | $F_{(1,10)} < 1$                       | P = 0.151        |
|                                |                    | Hemisphere                   | $F_{(1,10)} < 1$                       | P = 0.135        |
|                                |                    | Genotype x Hemisphere        | $F_{(1,10)} < 1$                       | P = 0.128        |
| BLA-Anterior Hippocampus       | AD                 | Genotype                     | $F_{(1,10)} < 1$                       | P = 0.167        |
|                                |                    | <b>Hemisphere</b>            | <b><math>F_{(1,10)} = 6.59</math></b>  | <b>P = 0.047</b> |
|                                |                    | <b>Genotype x Hemisphere</b> | <b><math>F_{(1,10)} = 10.53</math></b> | <b>P = 0.032</b> |
| BLA-Anterior Hippocampus       | RD                 | Genotype                     | $F_{(1,10)} < 1$                       | P = 0.158        |
|                                |                    | Hemisphere                   | $F_{(1,10)} = 2.59$                    | P = 0.092        |
|                                |                    | Genotype x Hemisphere        | $F_{(1,10)} < 1$                       | P = 0.173        |
| BLA-Posterior Hippocampus      | AD                 | Genotype                     | $F_{(1,10)} < 1$                       | P = 0.169        |
|                                |                    | <b>Hemisphere</b>            | <b><math>F_{(1,10)} = 12.79</math></b> | <b>P = 0.018</b> |
|                                |                    | <b>Genotype x Hemisphere</b> | <b><math>F_{(1,10)} = 12.97</math></b> | <b>P = 0.02</b>  |
| BLA-Posterior Hippocampus      | RD                 | Genotype                     | $F_{(1,10)} < 1$                       | P = 0.162        |
|                                |                    | Hemisphere                   | $F_{(1,10)} = 3.11$                    | P = 0.077        |
|                                |                    | Genotype x Hemisphere        | $F_{(1,10)} < 1$                       | P = 0.178        |

Statistical analysis of the anterior (Bregma -1.94 mm), and posterior (Bregma -3.28 mm) amygdala-hippocampal connections, analysed for axial diffusion (AD) and radial diffusion (RD). Analysis was performed using repeated measure two-way ANOVAs for genotype and hemisphere (Benjamini-Hochberg corrected (corrected P values stated)).

Supp. Table 3

| Brain Region | CLARITY Measure | ANOVA Comparison  | F Value                                | P Value          |
|--------------|-----------------|-------------------|----------------------------------------|------------------|
| M1           | OI              | Genotype          | $F_{(1,10)} < 1$                       | P = 0.182        |
|              |                 | Hemisphere        | $F_{(1,10)} = 1.74$                    | P = 0.108        |
| M1           | Cell Density    | Genotype          | $F_{(1,10)} = 2.04$                    | P = 0.099        |
|              |                 | Hemisphere        | $F_{(1,10)} = 1.41$                    | P = 0.117        |
| M1           | Fibre Density   | Genotype          | $F_{(1,10)} < 1$                       | P = 0.171        |
|              |                 | Hemisphere        | $F_{(1,10)} < 1$                       | P = 0.176        |
| S1           | OI              | Genotype          | $F_{(1,10)} < 1$                       | P = 0.185        |
|              |                 | <b>Hemisphere</b> | <b><math>F_{(1,10)} = 36.86</math></b> | <b>P = 0.005</b> |
| S1           | Cell Density    | Genotype          | $F_{(1,10)} < 1$                       | P = 0.131        |
|              |                 | <b>Hemisphere</b> | <b><math>F_{(1,10)} = 13.73</math></b> | <b>P = 0.016</b> |
| S1           | Fibre Density   | Genotype          | $F_{(1,10)} = 1.73$                    | P = 0.110        |
|              |                 | <b>Hemisphere</b> | <b><math>F_{(1,10)} = 8.51</math></b>  | <b>P = 0.038</b> |
| BF           | OI              | Genotype          | $F_{(1,10)} < 1$                       | P = 0.191        |
|              |                 | <b>Hemisphere</b> | <b><math>F_{(1,10)} = 10.59</math></b> | <b>P = 0.034</b> |
| BF           | Cell Density    | Genotype          | $F_{(1,10)} < 1$                       | P = 0.133        |
|              |                 | <b>Hemisphere</b> | <b><math>F_{(1,10)} = 8.70</math></b>  | <b>P = 0.041</b> |
| BF           | Fibre Density   | Genotype          | $F_{(1,10)} < 1$                       | P = 0.144        |
|              |                 | Hemisphere        | $F_{(1,10)} < 1$                       | P = 0.126        |

Statistical analysis of the primary motor cortex (M1), primary somatosensory cortex (S1) and the barrel field (BF). CLARITY imaged regions were then analysed for orientation index (OI), cell density and fibre density. Analysis was performed using repeated measure two-way ANOVAs for genotype and hemisphere (Benjamini-Hochberg corrected (corrected P values stated)).

**Supp. Figure 1**

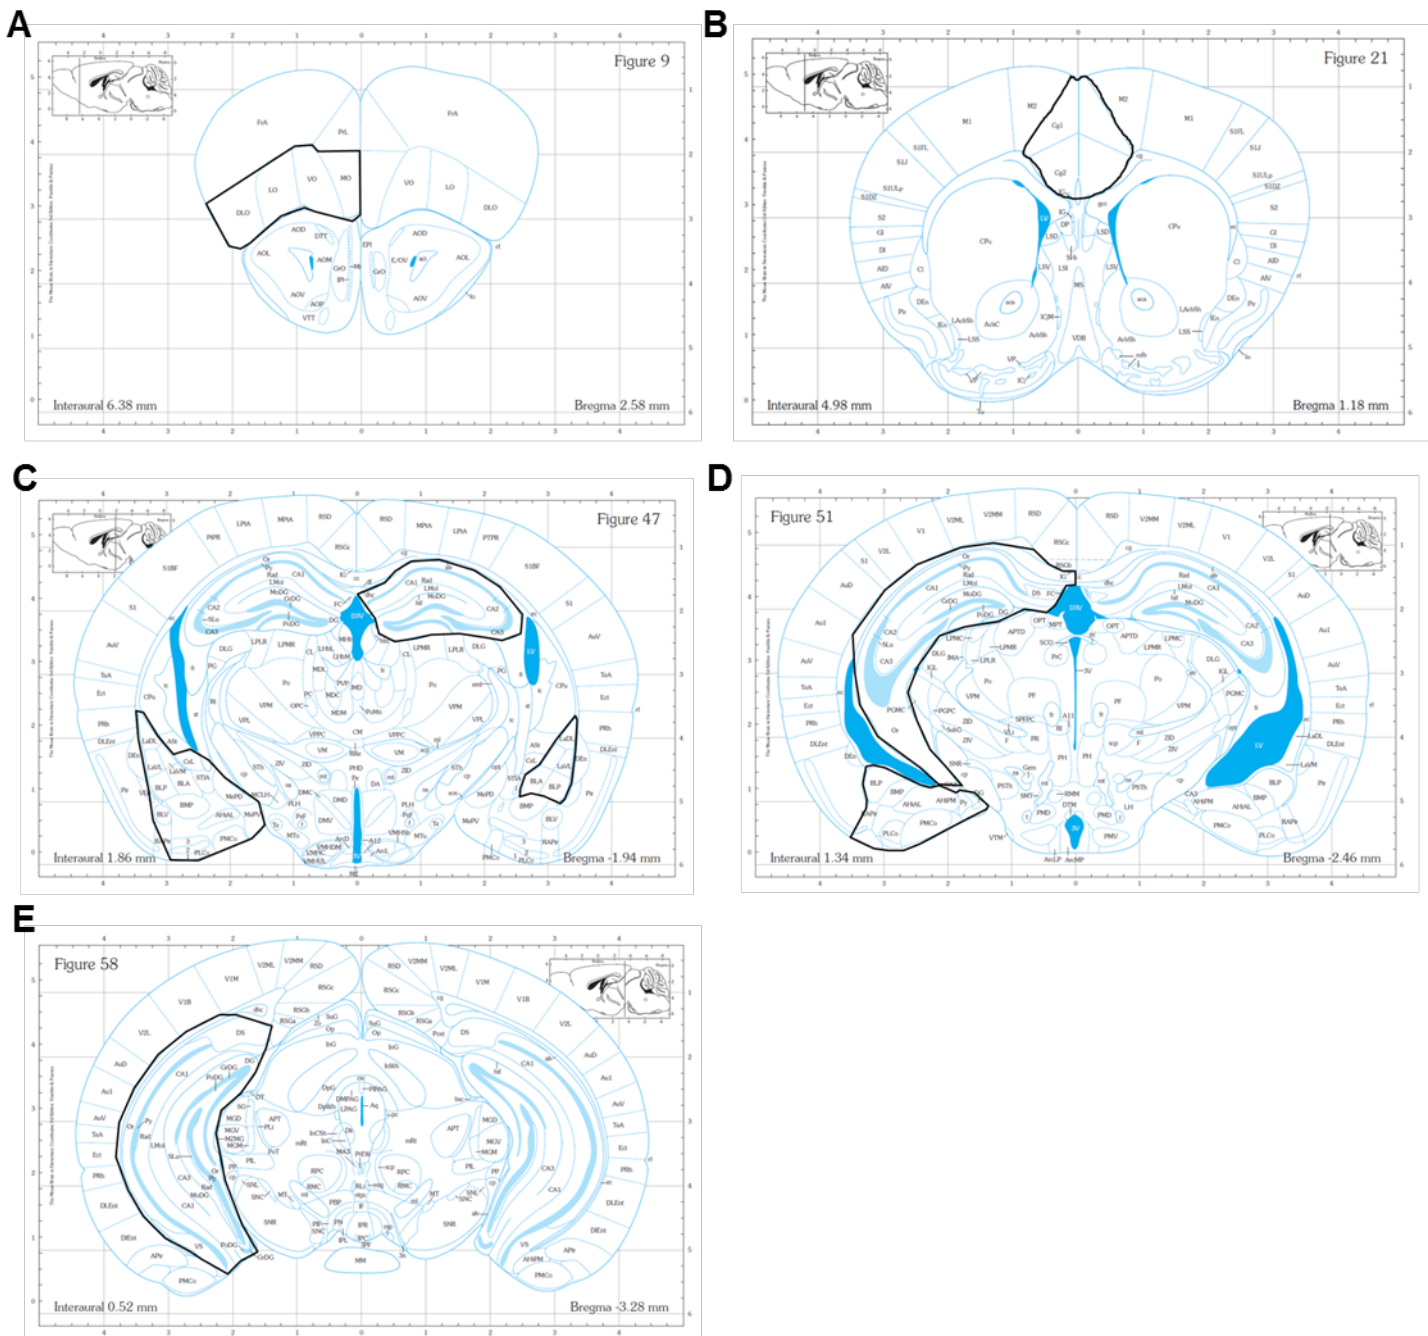

Atlas maps representing manual segmentation of regions of interest (ROI). (A) The orbitofrontal cortex ROI. (B) The ACC ROI. (C) The anterior hippocampus, anterior amygdala and basolateral amygdala ROI. (D) The mid hippocampus and posterior amygdala ROI. (E) The posterior hippocampus ROI. The atlas maps were used with the permission of the Authors (18).

## Supp. Figure 2

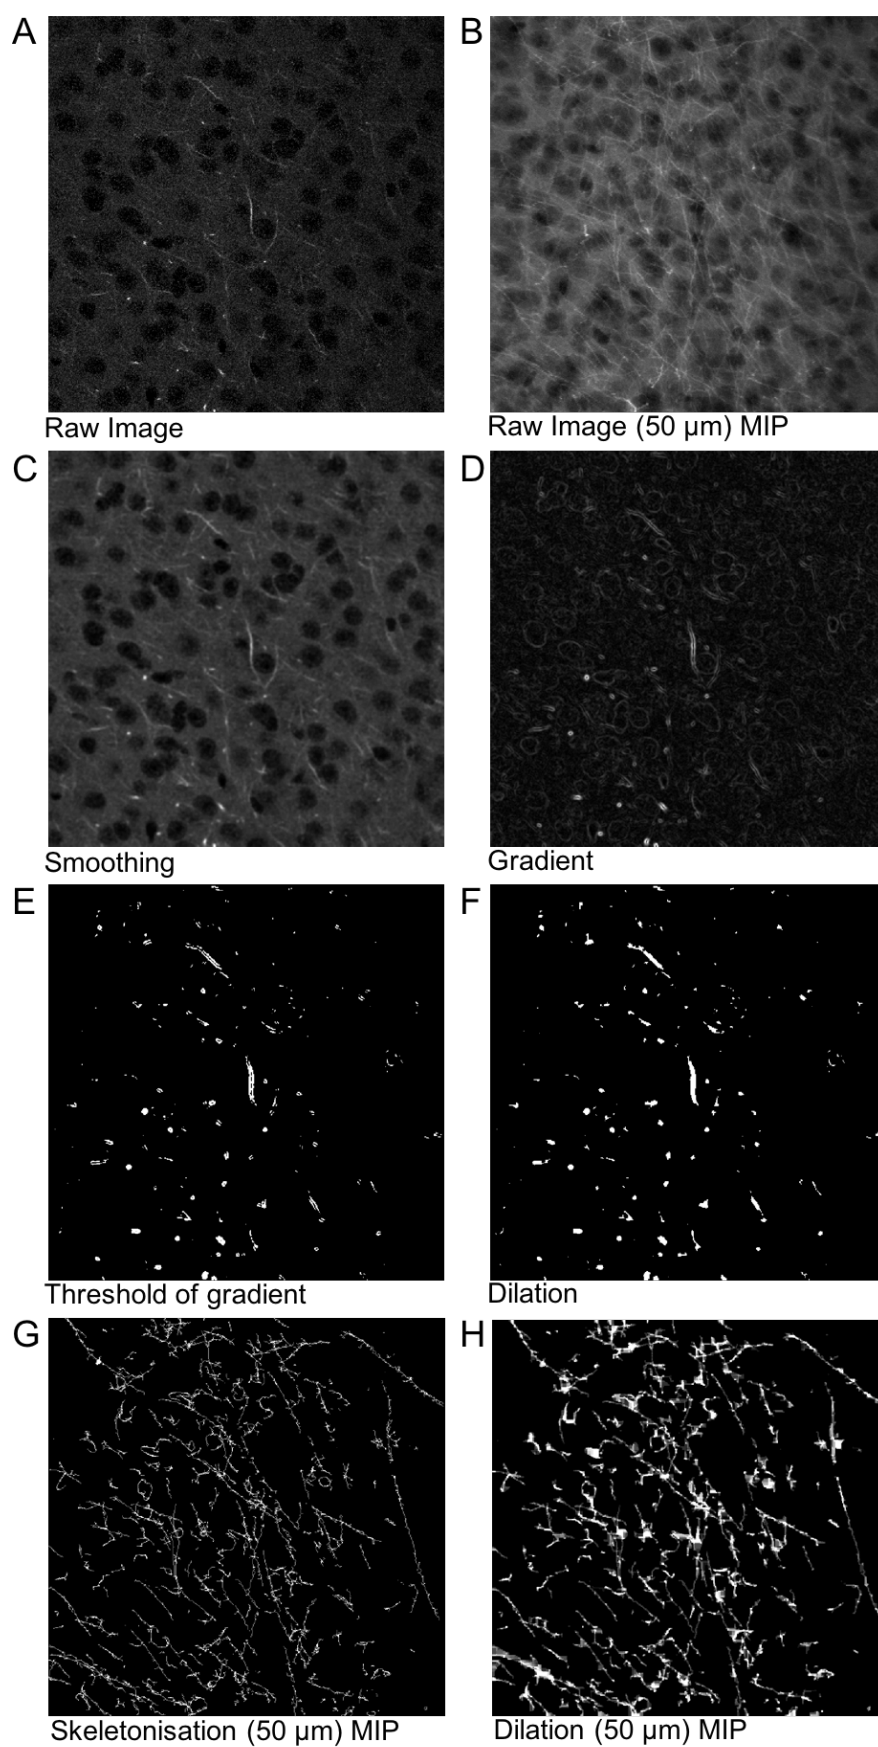

Analysis methodology of axonal segmentation from multiphoton images.

### Supp. Figure 3

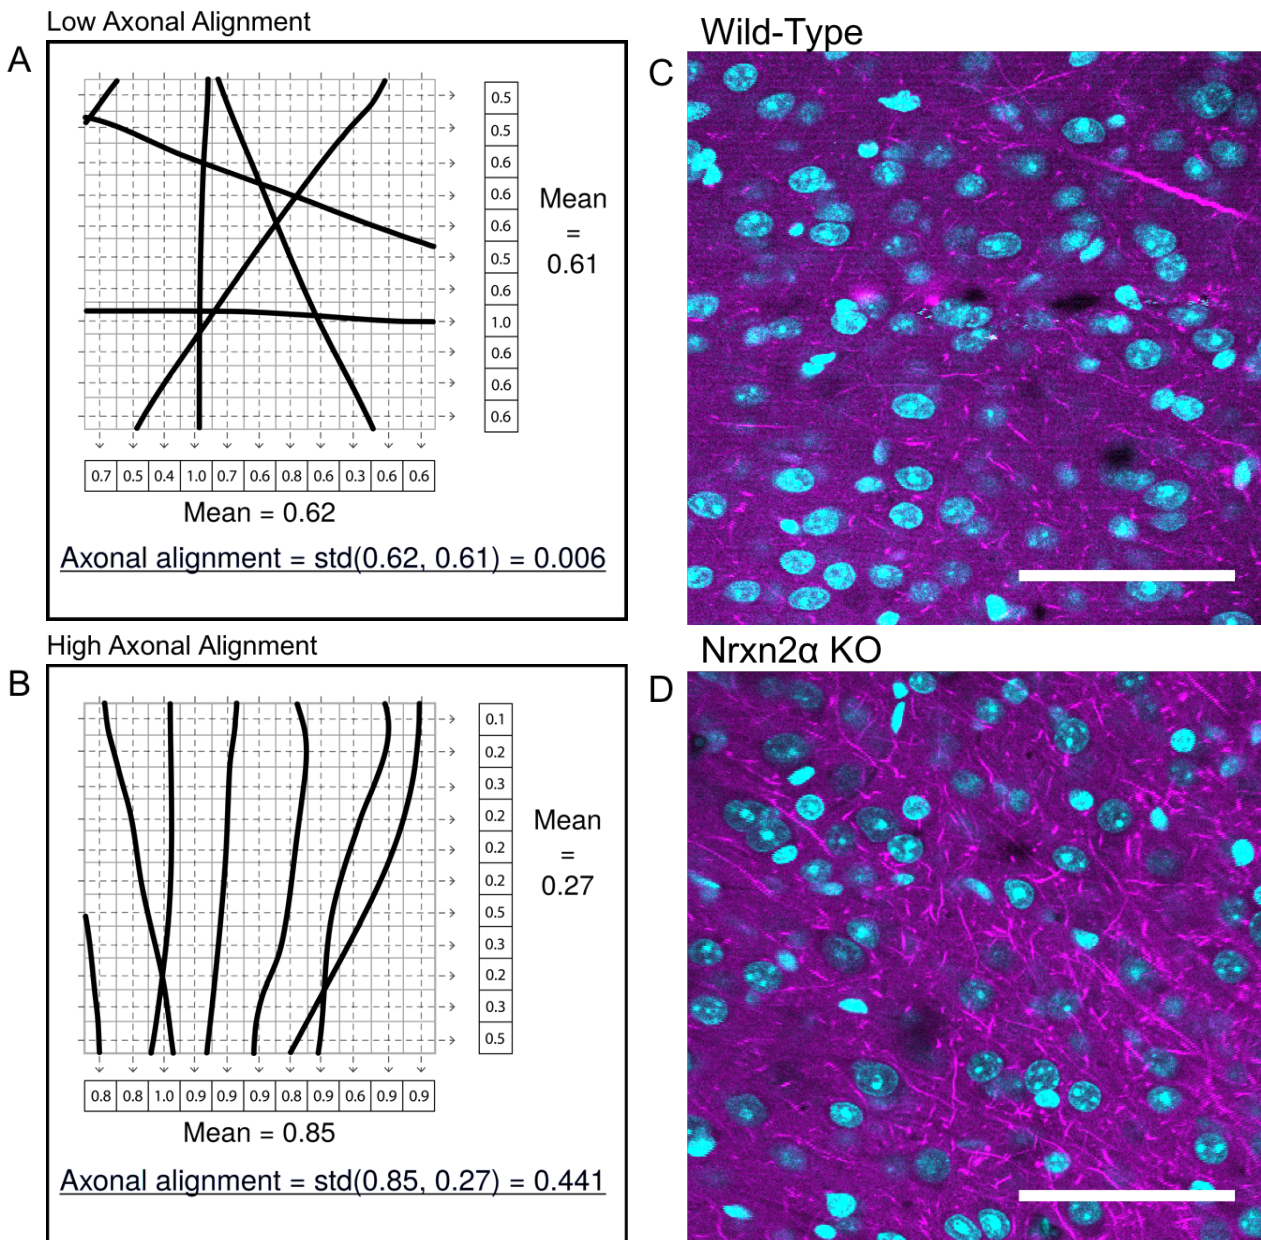

**A and B.** Illustration of the axonal alignment calculation in a simple two-dimensional case. The grey grid represents the image pixels, the black lines axons and the dashed lines represent the calculation process. Standard deviation denoted as *std.* **C and D.** Cingulate cortex images taken from wild-type and Nrnx2 $\alpha$  KO mice, visually representing the greater axonal alignment and density in KO mice.

## Supp. Figure 4

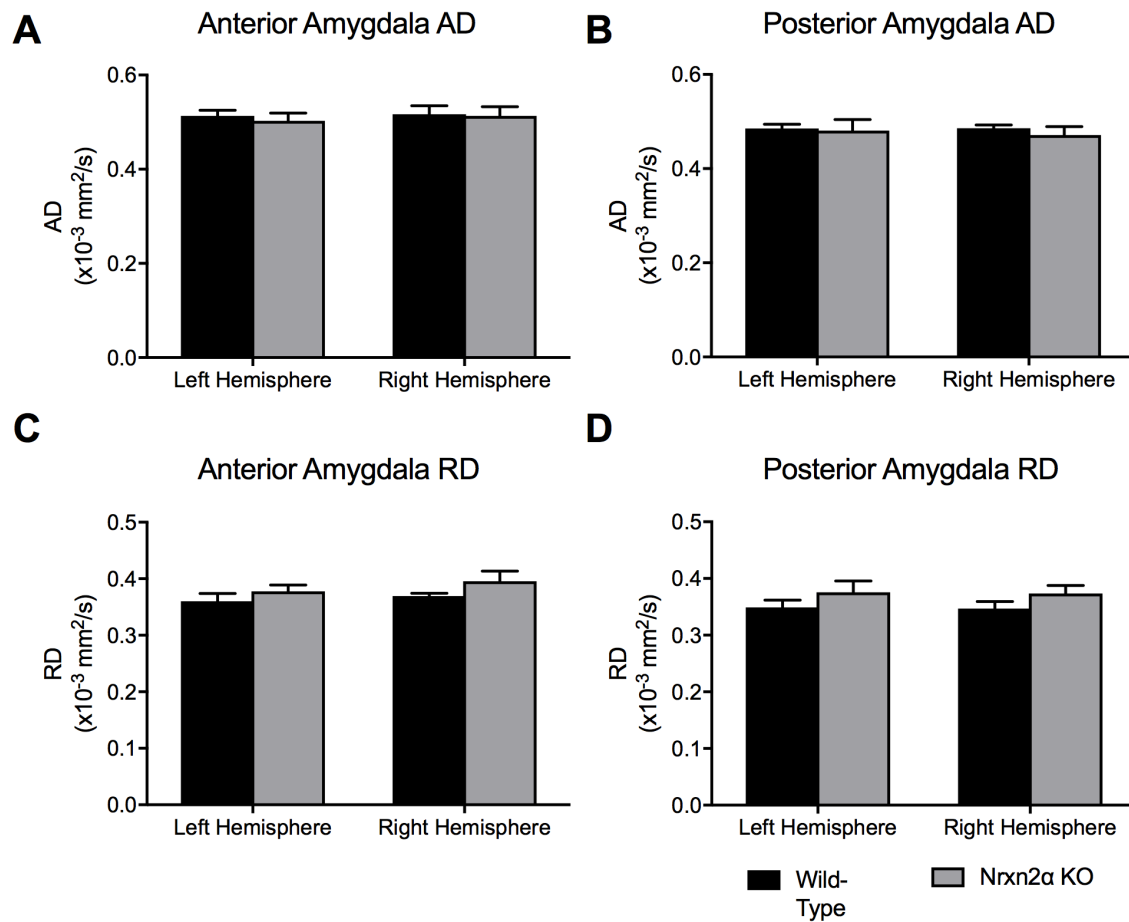

Axial diffusivity (AD) and radial diffusivity (RD) in the amygdala. The entire amygdala was segmented from DTI images at two regions; anterior (**A** and **C**: Bregma -1.94 mm) and posterior (**B** and **D**: Bregma -2.46 mm). No significant differences were observed between the genotypes for anterior or posterior regions. Error bars represent s.e.m. Wild-type n=6, Nrnx2 $\alpha$  KO n=6.

## Supp. Figure 5

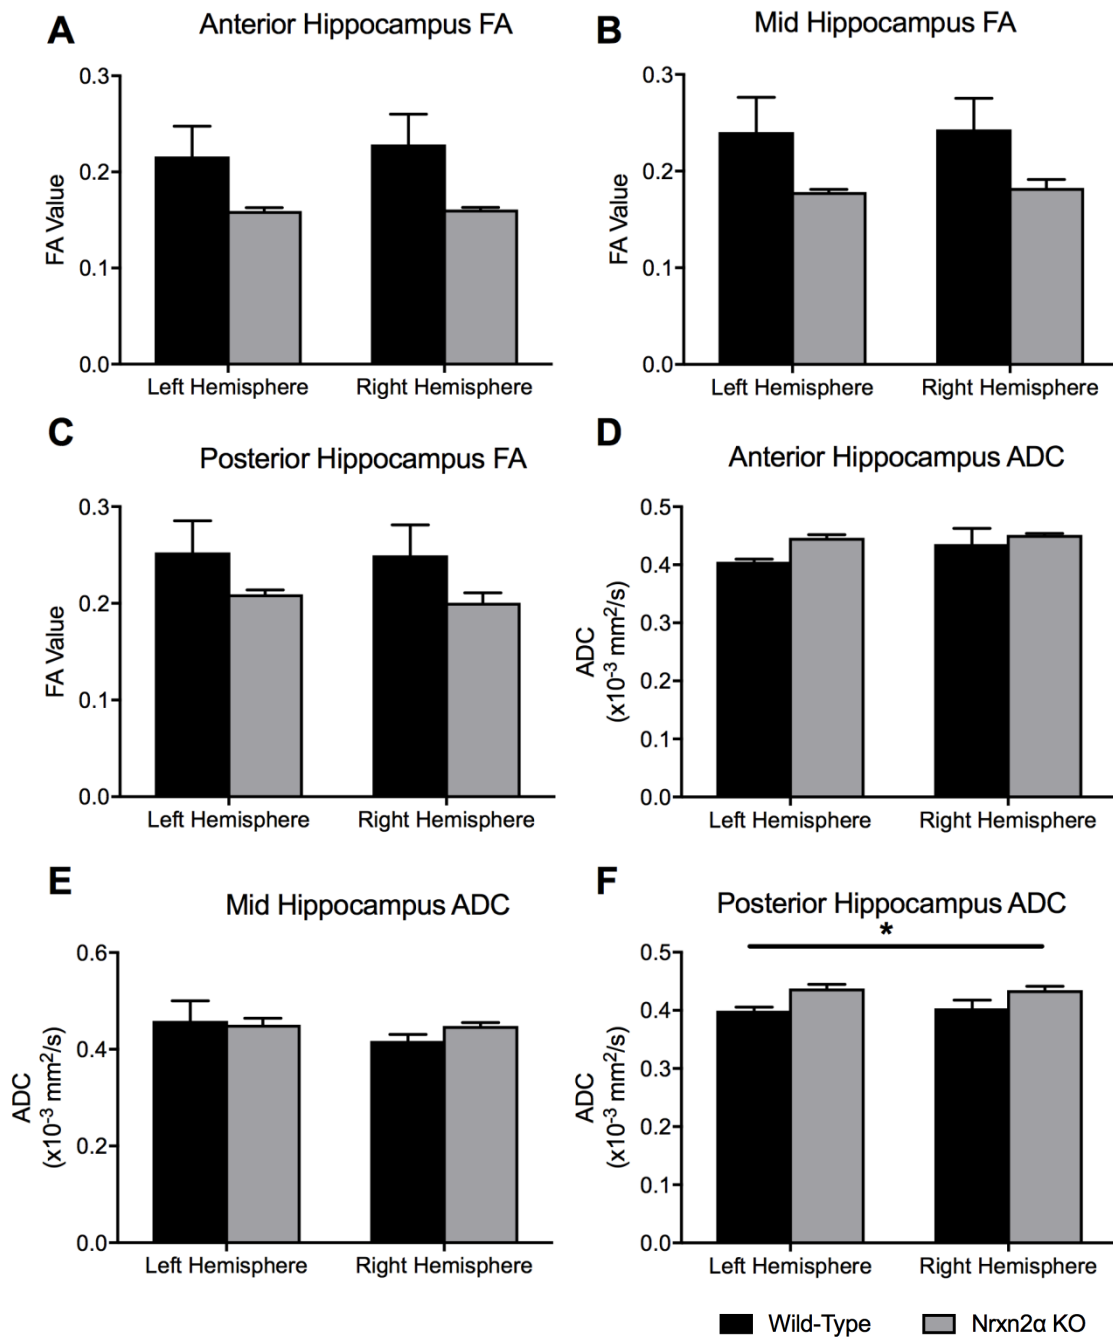

Fractional anisotropy (FA) and apparent diffusion coefficient (ADC) of the anterior to posterior hippocampus. Although Nrnx2 $\alpha$  KO had trends towards lower FA in the anterior (A), mid (B) and posterior (C) hippocampus, there were no significant differences. Similarly, anterior (D) and mid (E) hippocampal regions did not vary between the genotypes, the posterior hippocampus (F) had significantly increased ADC (f). \* = P<0.05. Error bars represent s.e.m. Wild-type n=6, Nrnx2 $\alpha$  KO n=6.



## Supp. Figure 6

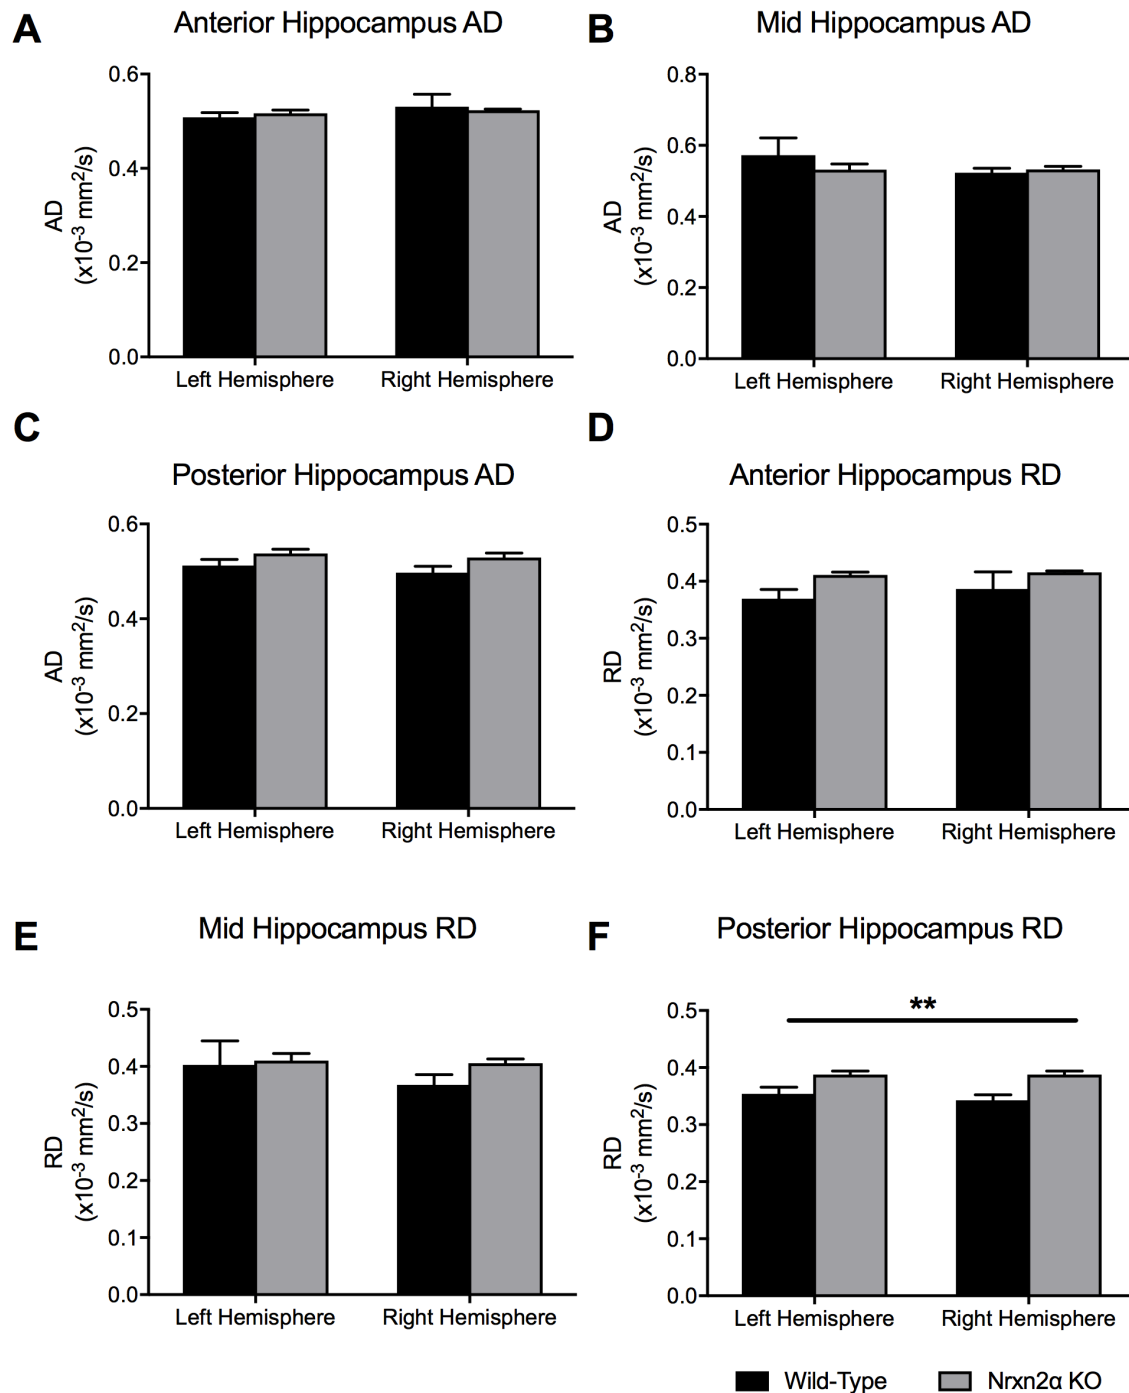

Axial diffusivity (AD) and radial diffusivity (RD) of the anterior to posterior hippocampus. AD did not differ in either the anterior (A), mid (B) and posterior (C) hippocampus. Although the anterior (D) and mid (E) hippocampal regions did not vary between the genotypes, the posterior hippocampus (F) had significantly increased RD (f). \*\* = P < 0.01. Error bars represent s.e.m. Wild-type n=6, Nrnx2 $\alpha$  KO n=6.

## Supp. Figure 7

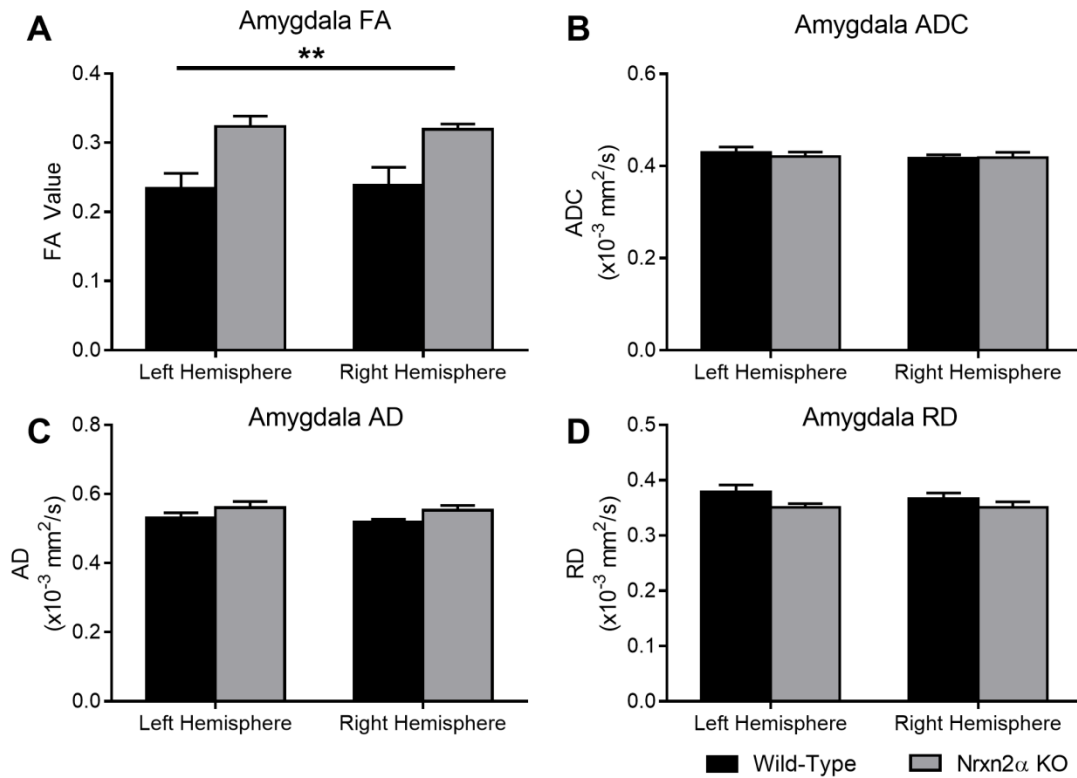

DTI quantified for the whole amygdala volume. **(A)** Fractional anisotropy (FA) was significantly increased in Nrnx2 $\alpha$  KO mice (genotype:  $F_{(1,10)} = 11.15$ ,  $p = 0.008$ ). However, **(B)** apparent diffusion coefficient (ADC) was not significantly altered (genotype:  $F_{(1,10)} < 1$ ,  $p = 0.782$ ), nor was **(C)** axial diffusivity (AD) (genotype:  $F_{(1,10)} = 3.06$ ,  $p = 0.111$ ) or **(D)** radial diffusivity (RD) (genotype:  $F_{(1,10)} = 2.47$ ,  $p = 0.147$ ). Error bars represent s.e.m. \*\* =  $P < 0.01$ . Wild-type  $n=6$ , Nrnx2 $\alpha$  KO  $n=6$ .

## Supp. Figure 8

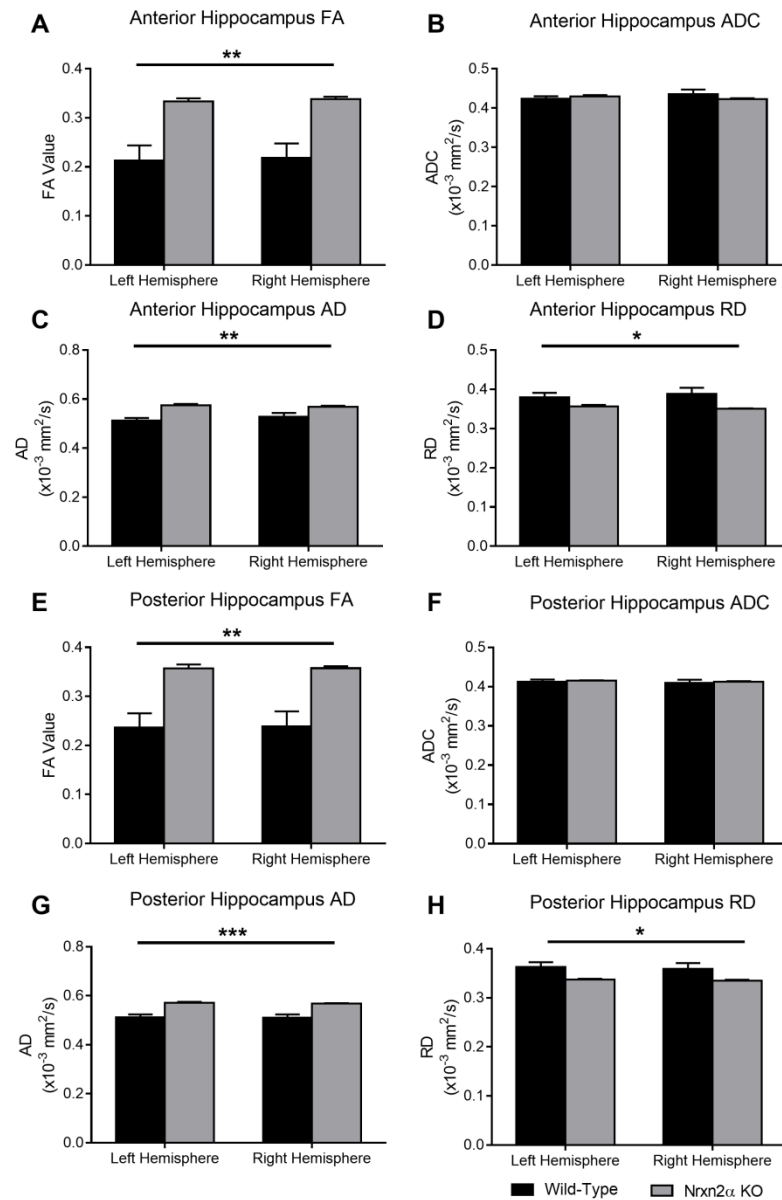

DTI quantified for the whole anterior hippocampus (Bregma -1.06 mm – -2.46 mm) and posterior hippocampus (Bregma -2.54 mm – -3.16 mm). (A) Fractional anisotropy (FA) in the anterior hippocampus was significantly increased in Nrnx2 $\alpha$  KO mice (genotype:  $F_{(1,10)} = 15.63$ ,  $p = 0.0027$ ) but (B) apparent diffusion coefficient (ADC) was not altered (genotype:  $F_{(1,10)} < 1$ ,  $p = 0.738$ ). (C) Axial diffusivity (AD) (genotype:  $F_{(1,10)} = 16.17$ ,  $p = 0.0024$ ) and (D) radial diffusivity (RD) (genotype:  $F_{(1,10)} = 5.05$ ,  $p = 0.048$ ) were both significantly altered in Nrnx2 $\alpha$  KO mice. In the posterior hippocampus, in Nrnx2 $\alpha$  KO mice, (E) FA was significant increased (genotype:  $F_{(1,10)} = 15.62$ ,  $p = 0.0027$ ), (F) ADC was similar to wild-types (genotype:  $F_{(1,10)} < 1$ ,  $p = 0.679$ ), (G) AD was increased (genotype:  $F_{(1,10)} = 22.31$ ,  $p = 0.0008$ ) and (H) RD was significantly reduced (genotype:  $F_{(1,10)} = 5.34$ ,  $p = 0.043$ ). Error bars represent s.e.m. \* =  $P < 0.05$ , \*\* =  $P < 0.01$ , \*\*\* =  $P < 0.001$ . Wild-type n=6, Nrnx2 $\alpha$  KO n=6.

## Supp. Figure 9

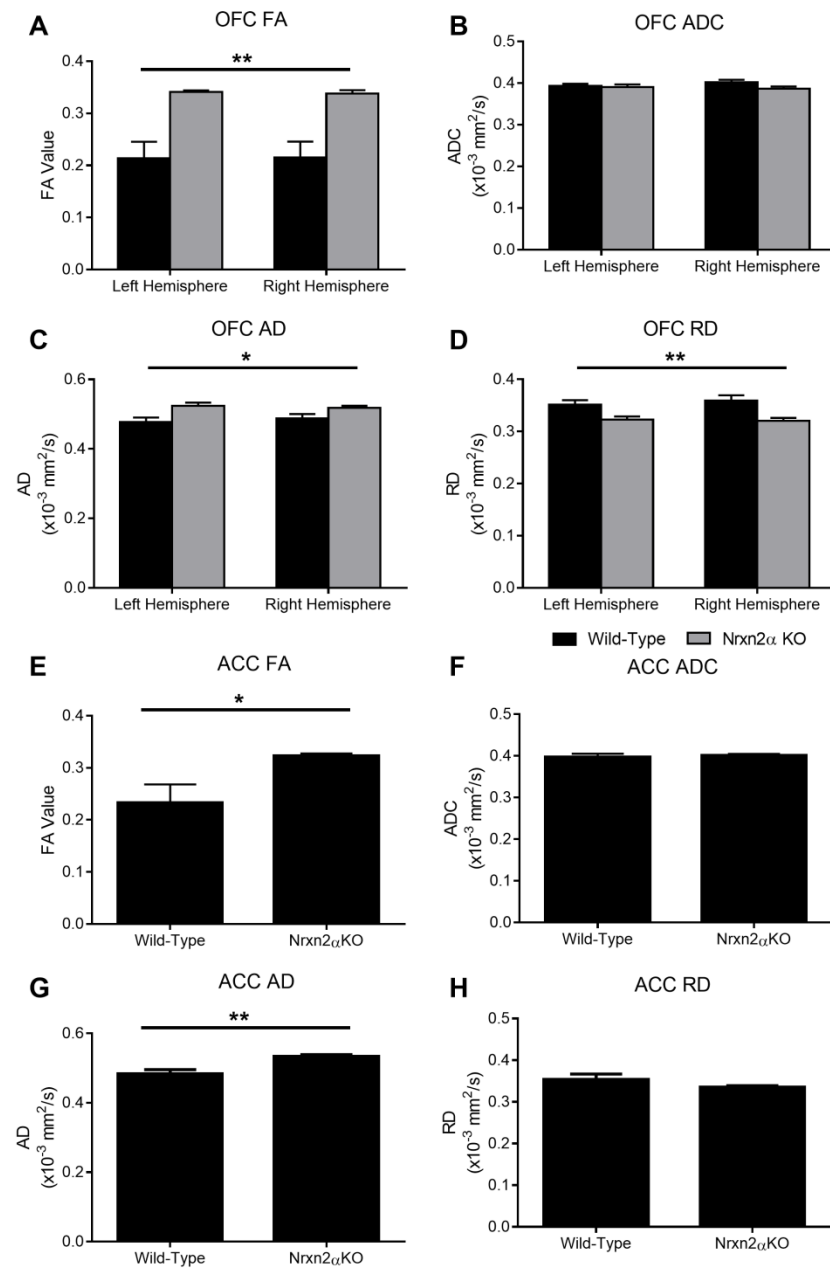

DTI quantified for the whole orbitofrontal cortex (OFC) and anterior cingulate cortex (ACC) and posterior hippocampus (Bregma -1.34 mm – -0.46 mm). **(A)** Fractional anisotropy (FA) in the OFC was significantly increased in Nrnx2 $\alpha$  KO mice (genotype:  $F_{(1,10)} = 16.14$ ,  $p = 0.0024$ ) but **(B)** apparent diffusion coefficient (ADC) was not altered (genotype:  $F_{(1,10)} = 1.43$ ,  $p = 0.260$ ). **(C)** Axial diffusivity (AD) (genotype:  $F_{(1,10)} = 6.71$ ,  $p = 0.027$ ) and **(D)** radial diffusivity (RD) (genotype:  $F_{(1,10)} = 10.07$ ,  $p = 0.0099$ ) were both significantly altered in Nrnx2 $\alpha$  KO mice. In the ACC of Nrnx2 $\alpha$  KO mice, **(E)** FA was significant increased (genotype:  $t_{(10)} = 2.55$ ,  $p = 0.029$ ), **(F)** ADC was similar to wild-types (genotype:  $t_{(10)} = 2.55$ ,  $p = 0.618$ ), **(G)** AD was increased (genotype:  $t_{(10)} = 3.89$ ,  $p = 0.003$ ) and **(H)** RD was not significantly different (genotype:  $t_{(10)} = 1.35$ ,  $p = 0.208$ ). Error bars represent s.e.m. \* =  $P < 0.05$ , \*\* =  $P < 0.01$ . Wild-type  $n=6$ , Nrnx2 $\alpha$  KO  $n=6$ .

## Supp. Figure 10

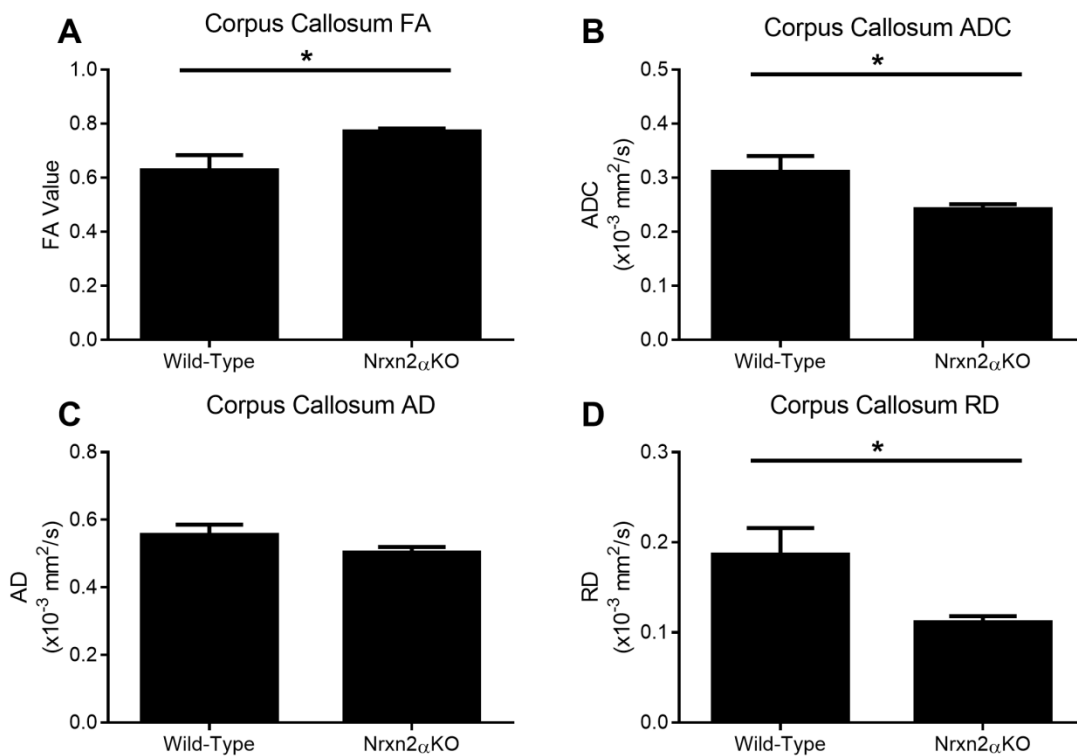

DTI quantification of the corpus callosum (Bregma 0.98 mm). To examine the integrity of white matter tracts within Nrnx2 $\alpha$  KO mice, we examined diffusivity in the corpus callosum. **(A)** Fractional anisotropy (FA) was significantly increased in Nrnx2 $\alpha$  KO mice (genotype:  $t_{(10)} = 2.50$ ,  $p = 0.032$ ) and apparent diffusion coefficient (ADC) **(B)** significantly decreased (genotype:  $t_{(10)} = 2.28$ ,  $p = 0.046$ ). This difference appeared to be driven predominantly by radial diffusivity (RD), as axial diffusion (AD) **(C)** was not significantly different (genotype:  $t_{(10)} = 1.49$ ,  $p = 0.168$ ) whilst RD **(D)** was significantly reduced in Nrnx2 $\alpha$  KO mice (genotype:  $t_{(10)} = 2.45$ ,  $p = 0.034$ ). Error bars represent s.e.m. \* =  $P < 0.05$ . Wild-type  $n=6$ , Nrnx2 $\alpha$  KO  $n=6$ .

## Supp. Figure 11

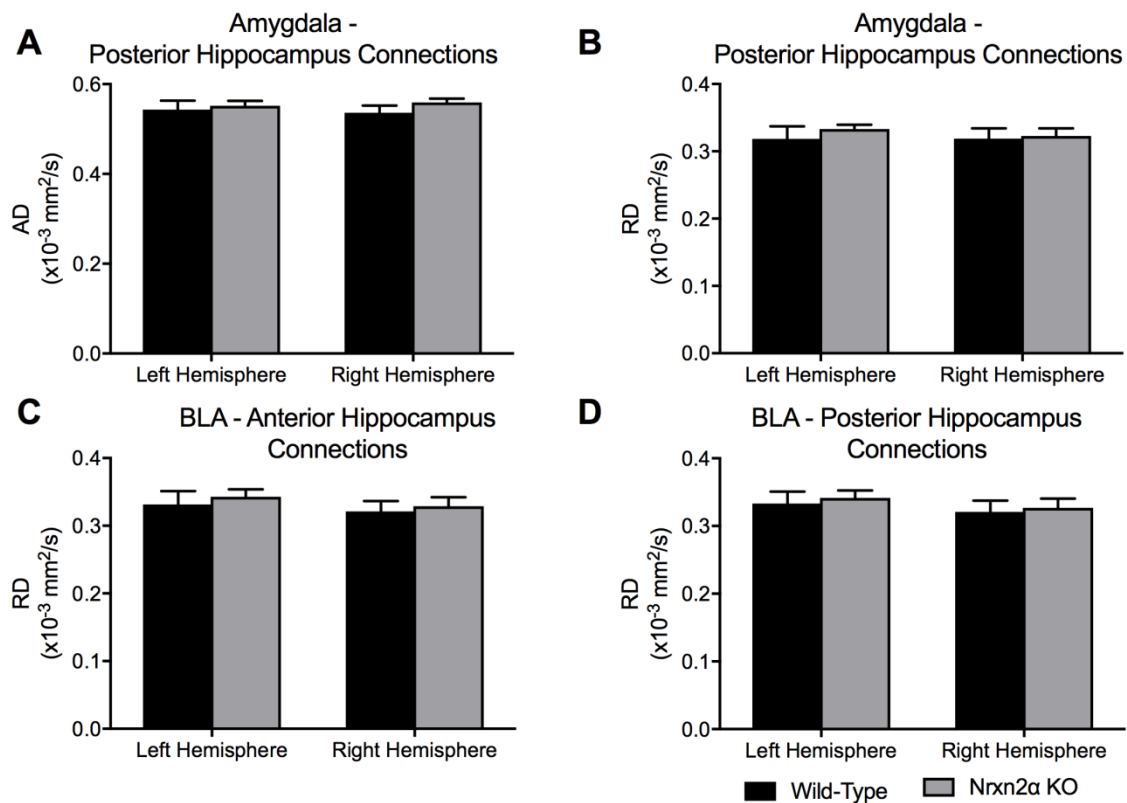

Axial diffusivity (AD) and radial diffusivity (RD) of computed tracts of connections from the amygdala to hippocampus. Tracts from the anterior amygdala to the posterior hippocampus (Bregma -2.46 mm) were analysed for AD (**A**) and RD (**B**). No significant differences between the tracts of Nrnx2 $\alpha$  KO mice were observed. No significant differences were found for RD of tracts specifically from the basolateral nuclei of the amygdala (BLA) to the anterior (**C**) or posterior (**D**) hippocampus. Error bars represent s.e.m. Wild-type n=6, Nrnx2 $\alpha$  KO n=6.

## Supp. Figure 12

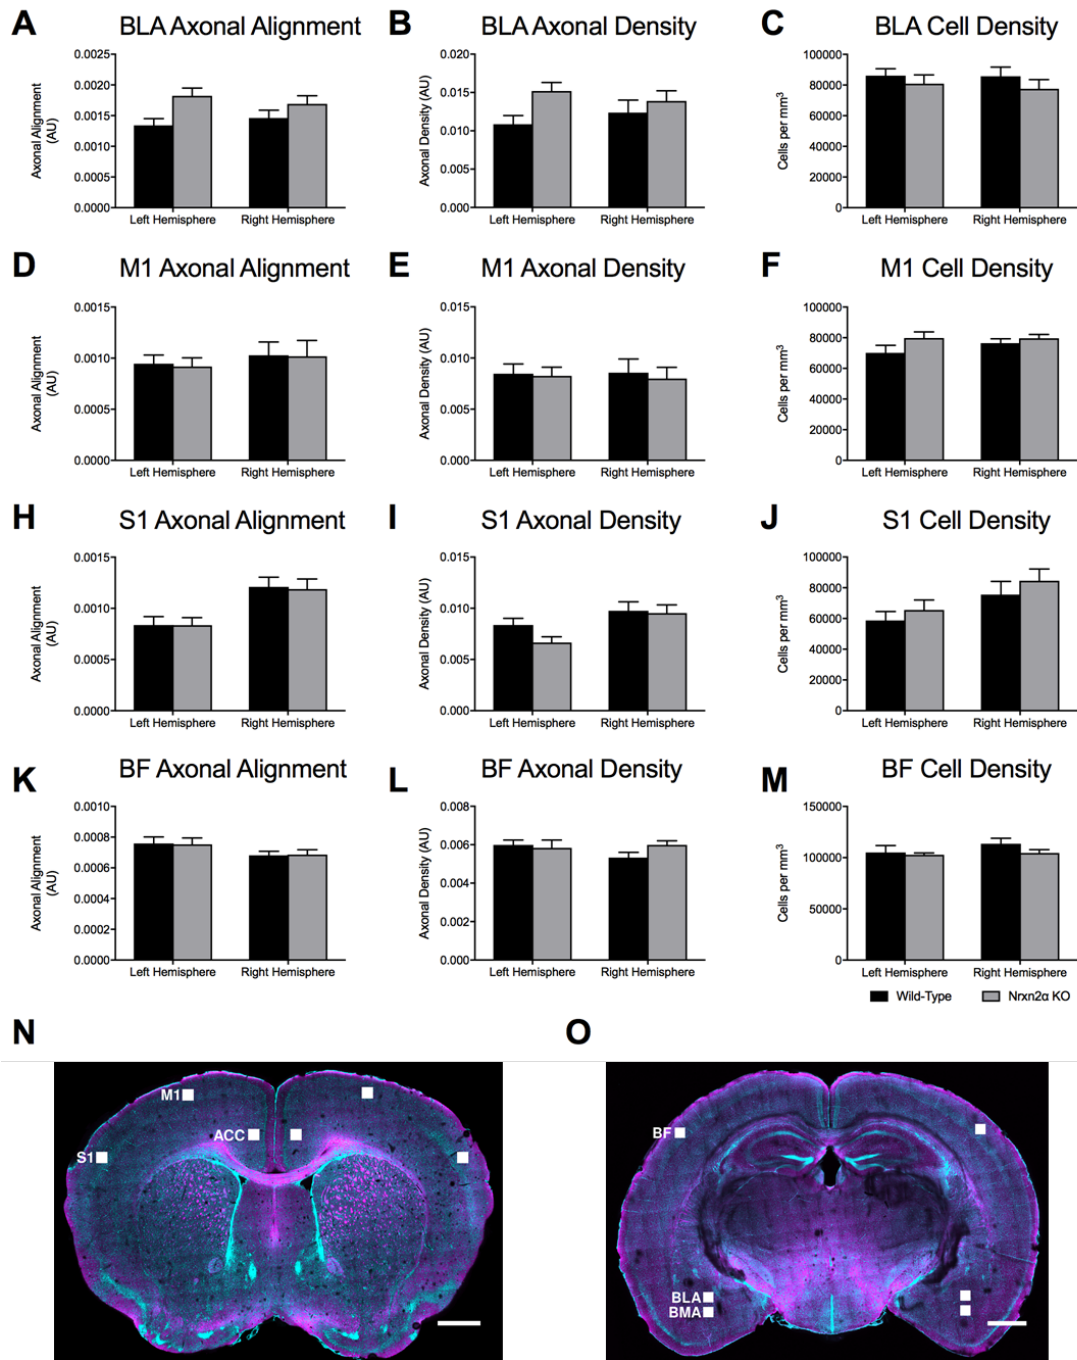

CLARITY-derived quantification of fibres and cell density within the basolateral amygdala (BLA) and control regions (**A**) Although there were trends towards increased axonal alignment and fibre density (**B**) in Nrnx2α KO mice, no significant differences were found. (**C**) Cell density in the BLA was similar between the genotypes. Statistical analysis (Supp. Table 4) was performed for the primary motor cortex (M1; **D-F**), primary somatosensory cortex (S1; **H-J**) and the barrel field (BF; **K-M**). No genotypic differences were found for any measure within these cortical regions. (**N-O**) CLARITY images of the scanned regions of interest. Error bars represent s.e.m. Wild-type n=6, Nrnx2α KO n=6.

## References

1. Wu D, Xu J, McMahon MT, van Zijl PC, Mori S, Northington FJ, et al. In vivo high-resolution diffusion tensor imaging of the mouse brain. *NeuroImage*. 2013;83:18-26.
2. Vo A, Sako W, Dewey SL, Eidelberg D, Ulug AM. 18FDG-microPET and MR DTI findings in Tor1a+/- heterozygous knock-out mice. *Neurobiology of disease*. 2015;73:399-406.
3. Kumar M, Duda JT, Hwang WT, Kenworthy C, Ittyerah R, Pickup S, et al. High resolution magnetic resonance imaging for characterization of the neuroligin-3 knock-in mouse model associated with autism spectrum disorder. *PloS one*. 2014;9(10):e109872.
4. Ruest T, Holmes WM, Barrie JA, Griffiths IR, Anderson TJ, Dewar D, et al. High-resolution diffusion tensor imaging of fixed brain in a mouse model of Pelizaeus-Merzbacher disease: comparison with quantitative measures of white matter pathology. *NMR in biomedicine*. 2011;24(10):1369-79.
5. Kim S, Pickup S, Fairless AH, Ittyerah R, Dow HC, Abel T, et al. Association between sociability and diffusion tensor imaging in BALB/cJ mice. *NMR in biomedicine*. 2012;25(1):104-12.
6. Jones DK. The effect of gradient sampling schemes on measures derived from diffusion tensor MRI: a Monte Carlo study. *Magnetic resonance in medicine*. 2004;51(4):807-15.
7. Lebel C, Benner T, Beaulieu C. Six is enough? Comparison of diffusion parameters measured using six or more diffusion-encoding gradient directions with deterministic tractography. *Magnetic resonance in medicine*. 2012;68(2):474-83.
8. Ni H, Kavcic V, Zhu T, Ekholm S, Zhong J. Effects of number of diffusion gradient directions on derived diffusion tensor imaging indices in human brain. *AJNR American journal of neuroradiology*. 2006;27(8):1776-81.
9. Hasan KM, Parker DL, Alexander AL. Comparison of gradient encoding schemes for diffusion-tensor MRI. *Journal of magnetic resonance imaging : JMRI*. 2001;13(5):769-80.
10. Schindelin J, Arganda-Carreras I, Frise E, Kaynig V, Longair M, Pietzsch T, et al. Fiji: an open-source platform for biological-image analysis. *Nature methods*. 2012;9(7):676-82.
11. Peng H, Ruan Z, Long F, Simpson JH, Myers EW. V3D enables real-time 3D visualization and quantitative analysis of large-scale biological image data sets. *Nature biotechnology*. 2010;28(4):348-53.
12. Linkert M, Rueden CT, Allan C, Burel JM, Moore W, Patterson A, et al. Metadata matters: access to image data in the real world. *The Journal of cell biology*. 2010;189(5):777-82.
13. Perge JA, Niven JE, Mugnaini E, Balasubramanian V, Sterling P. Why do axons differ in caliber? *The Journal of neuroscience : the official journal of the Society for Neuroscience*. 2012;32(2):626-38.
14. Otsu N. A Threshold Selection Method from Gray-Level Histograms. *IEEE Transactions on Systems, Man, and Cybernetics*. 1979;9(1):62-6.
15. Rosin P. Unimodal thresholding. *Pattern Recognition*. 2001;34(11):2083-96.
16. Lee T, Kashyap R, Chu C. Building Skeleton Models via 3-D Medial Surface Axis Thinning Algorithms. *CVGIP: Graphical Models and Image Processing*. 1994;56(6):462-78.
17. Kerschnitzki M, Kollmannsberger P, Burghammer M, Duda GN, Weinkamer R, Wagermaier W, et al. Architecture of the osteocyte network correlates with bone material quality. *Journal of bone and mineral research : the official journal of the American Society for Bone and Mineral Research*. 2013;28(8):1837-45.
18. Franklin K, Paxinos G. *The Mouse Brain in Stereotaxic Coordinates*: Academic Press; 2008.



Figure 1

**A**

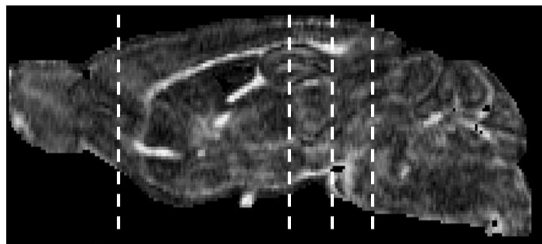

**i**

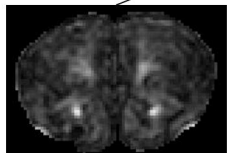

Bregma +2.58 mm

**ii**

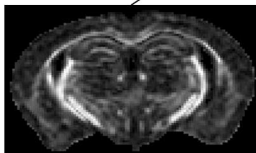

Bregma -1.94 mm

**iii**

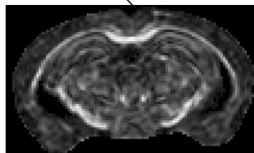

Bregma -2.46 mm

**iv**

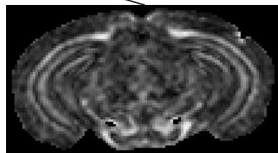

Bregma -3.28 mm

**B**

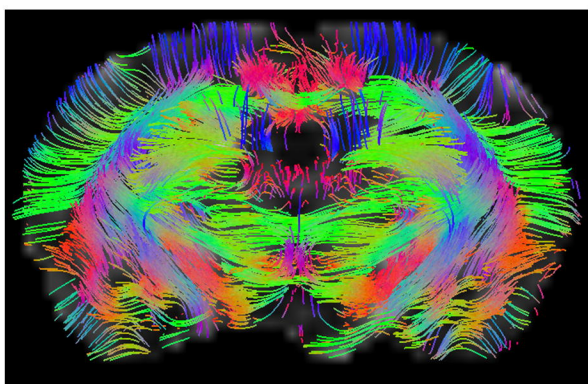

**C**

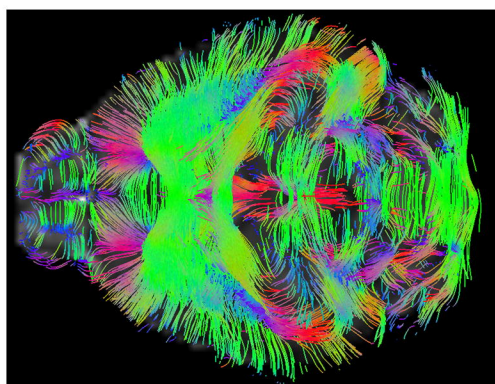

**D**

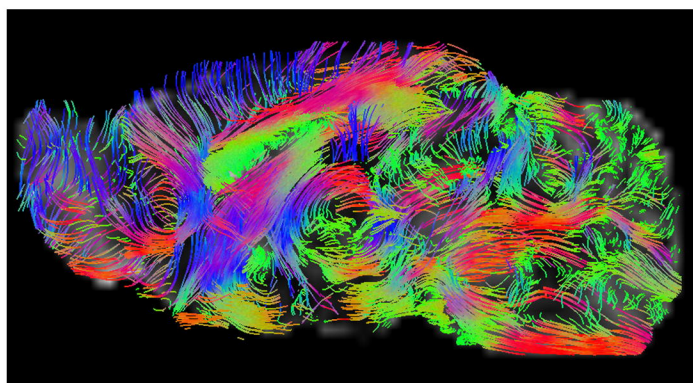

**E**

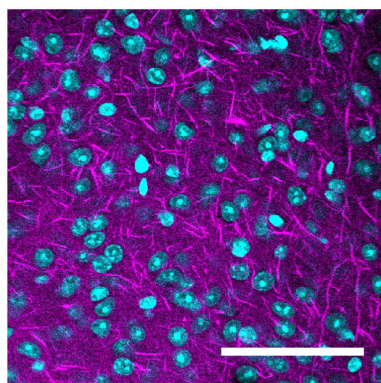

**F**

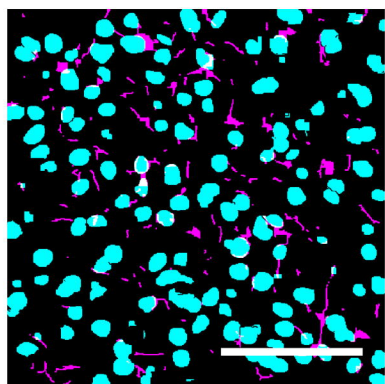

**G**

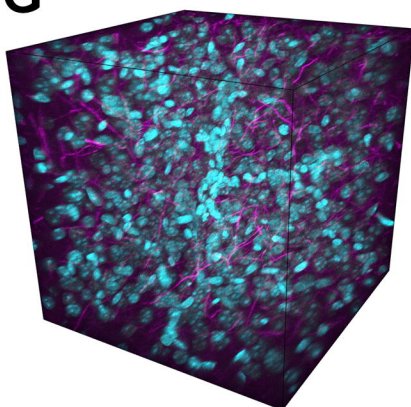

**H**

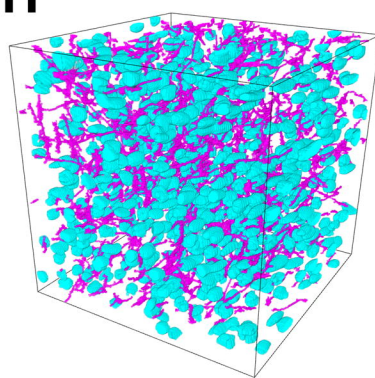

# Figure 2

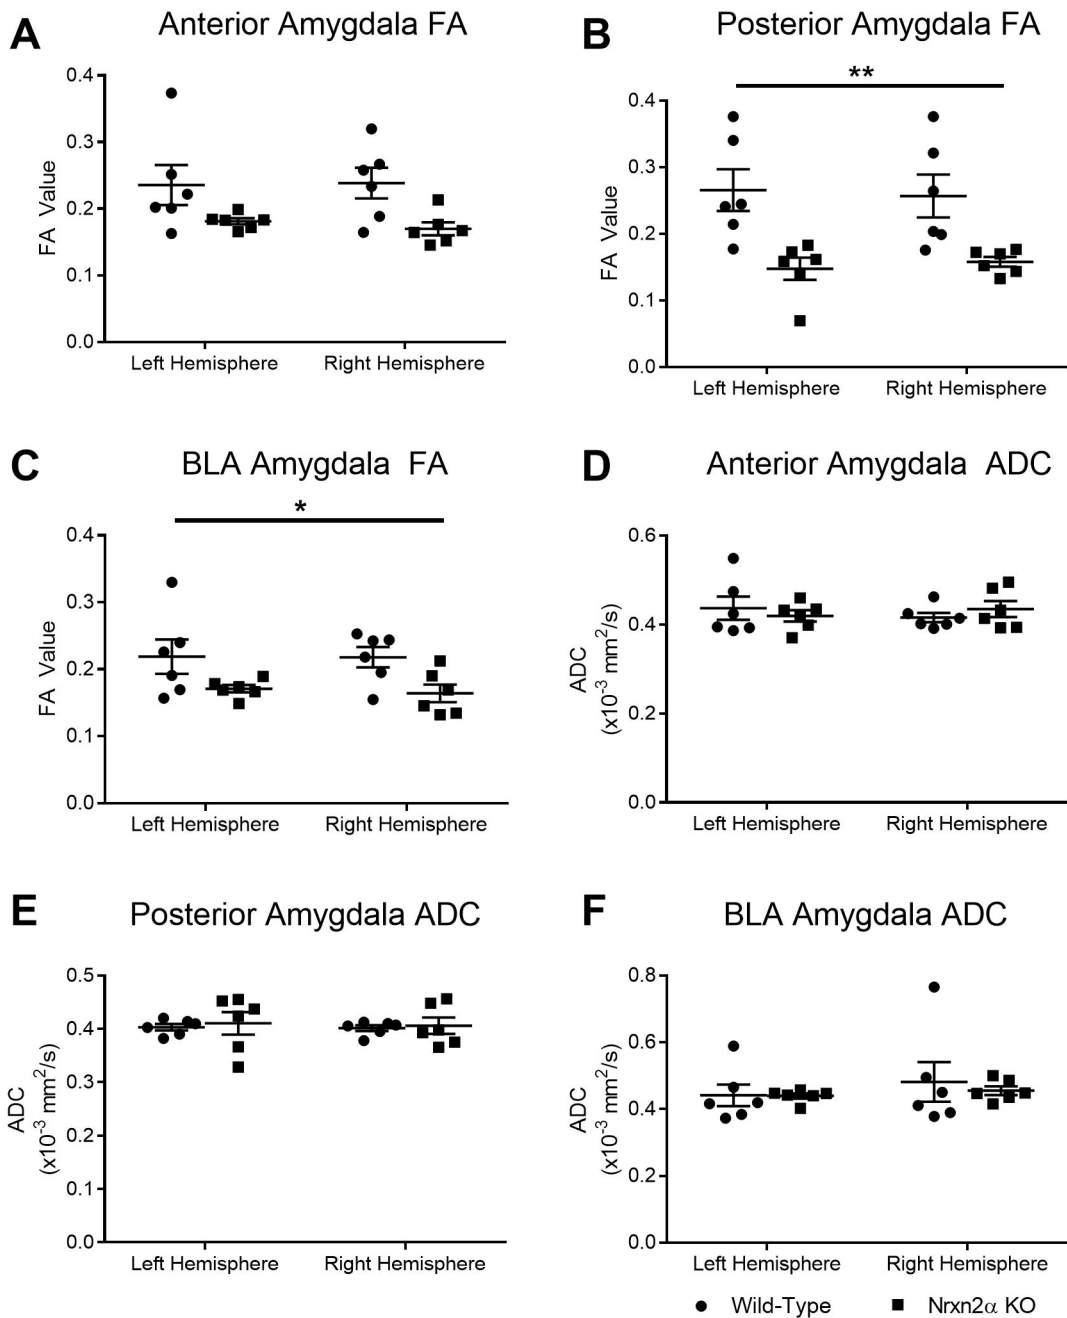

# Figure 3

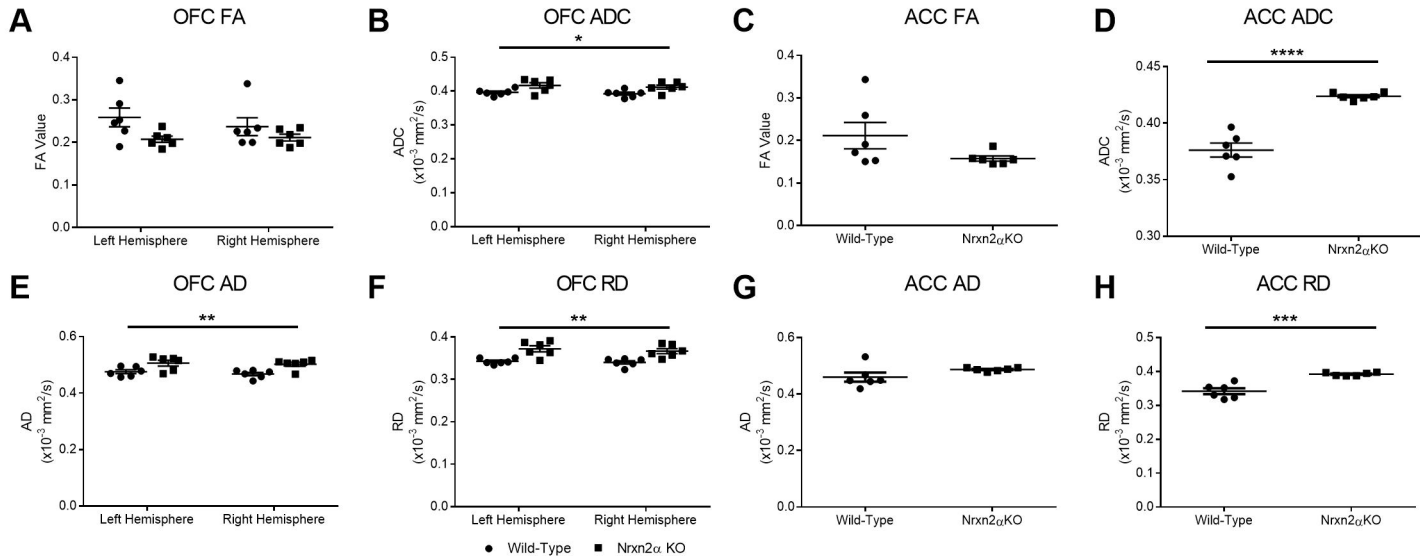

# Figure 4

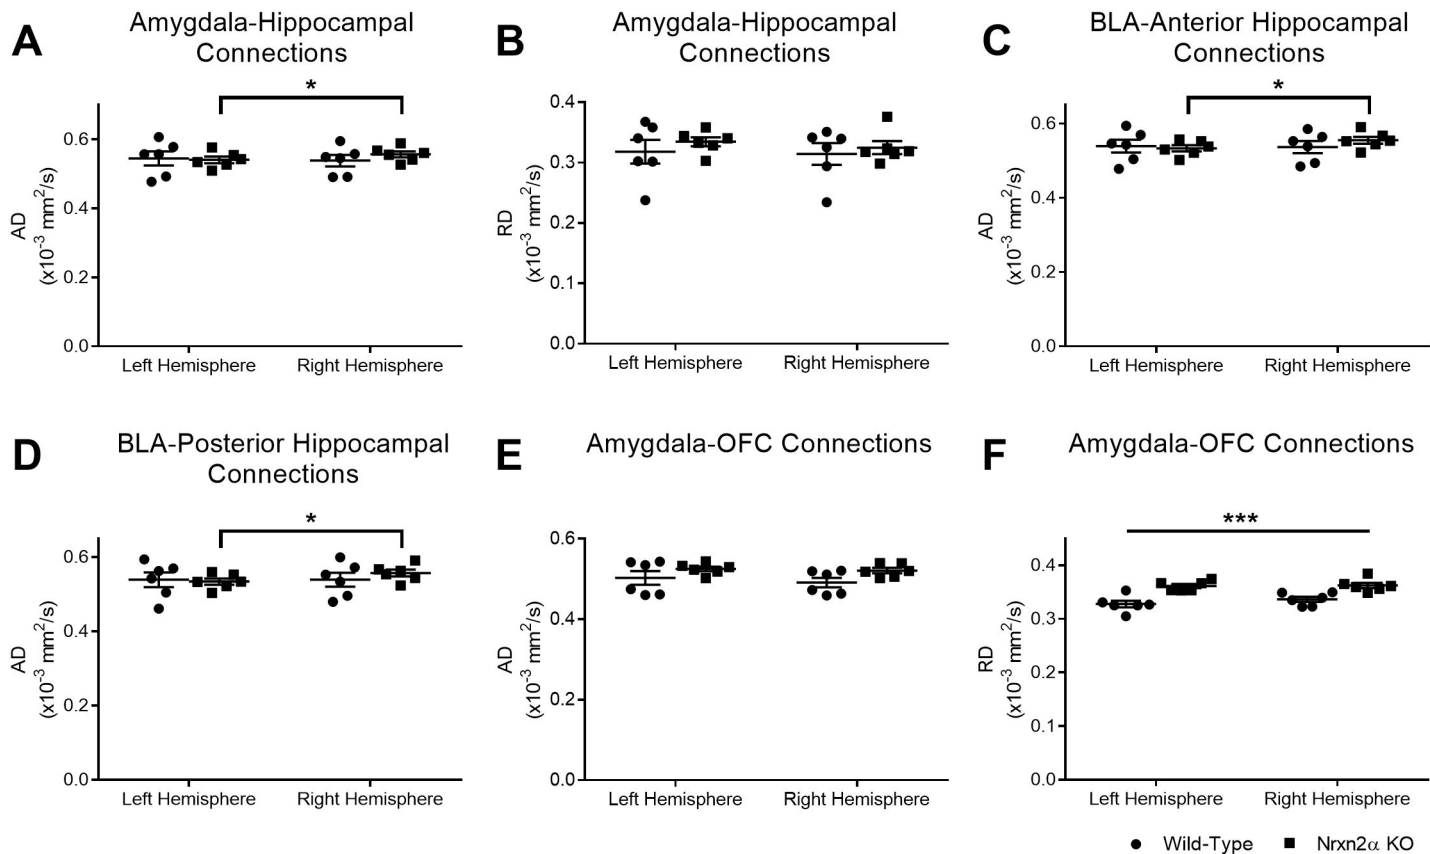

Figure 5

**A**

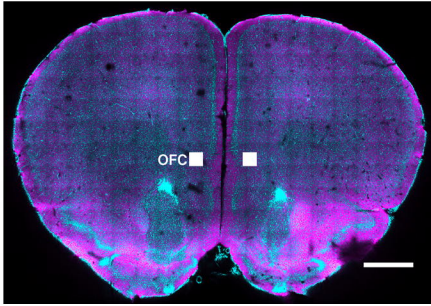

**B**

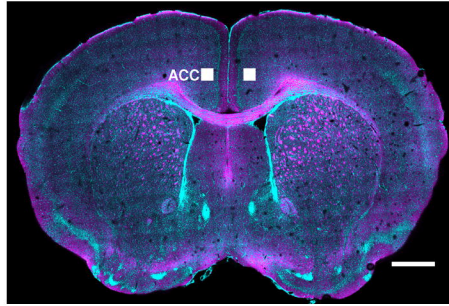

**C**

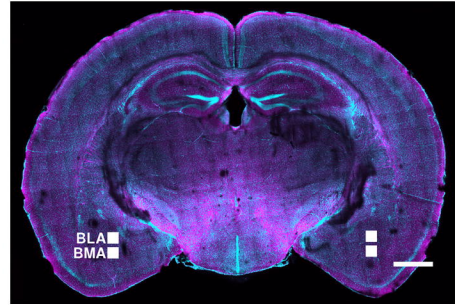

**D**

ACC Axonal Alignment

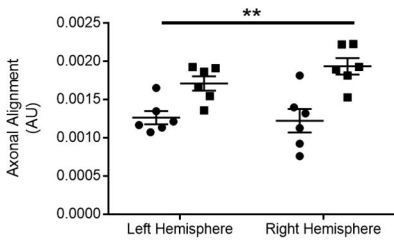

**E**

ACC Axonal Density

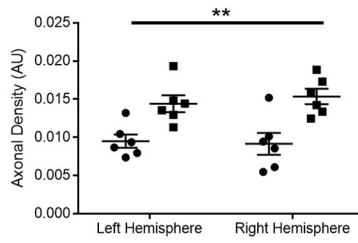

**F**

ACC Cell Density

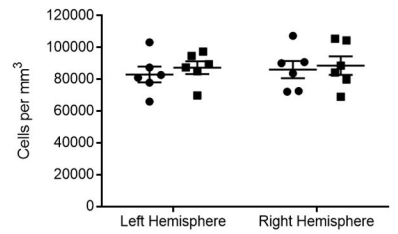

**G**

Medial OFC Axonal Alignment

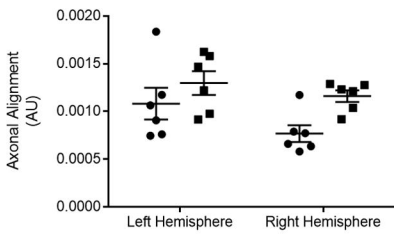

**H**

Medial OFC Axonal Density

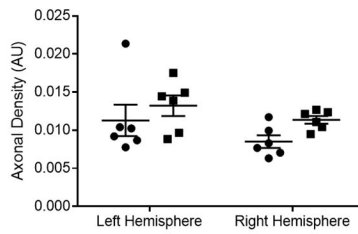

**I**

Medial OFC Cell Density

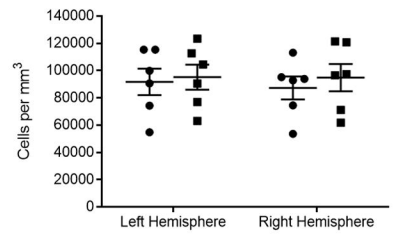

**J**

BMA Axonal Alignment

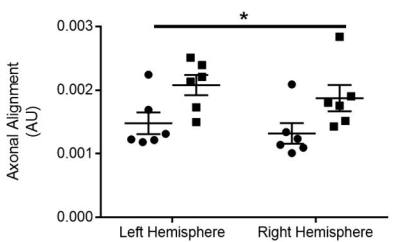

**K**

BMA Axonal Density

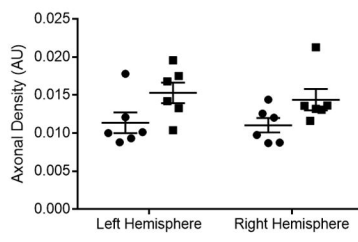

**L**

BMA Cell Density

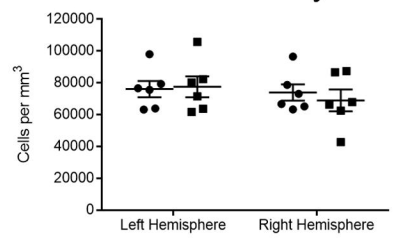

● Wild-Type ■ Nrnx2α KO
